# Supplementary material for: Involvement of TRPV4 in temperature-dependent perspiration in mice
Source: eLife. 2024 Jul 4;13:RP92993. doi: 10.7554/eLife.92993 (PMC11223765; doi:10.7554/eLife.92993)
Supplement: Figure 2—source data 1. [file elife-92993-fig2-data1.xlsx]

## Sheet: Fig.1A
	Iono max	2.576	2.29	2.429	2.59	2.537	2.779	2.655	2.222	1.966	1.965	1.745
																											Ave	S.E.
1	0	1.024	1.015	0.969	0.93	0.961	0.95	0.962	0.868	0.855	0.831	0.866		0	0.397516	0.443231	0.39893	0.359073	0.378794	0.34185	0.362335	0.390639	0.434893	0.422901	0.496275		0.402403	0.0134286
2	0.05	1.031	1.015	0.975	0.94	0.961	0.954	0.964	0.873	0.866	0.839	0.882		0.05	0.400233	0.443231	0.4014	0.362934	0.378794	0.343289	0.363089	0.392889	0.440488	0.426972	0.505444		0.405342	0.0139789
3	0.1	1.033	1.009	0.963	0.928	0.956	0.949	0.965	0.875	0.867	0.839	0.879		0.1	0.401009	0.440611	0.396459	0.358301	0.376823	0.34149	0.363465	0.393789	0.440997	0.426972	0.503725		0.403967	0.0140549
4	0.15	1.032	1	0.961	0.93	0.953	0.949	0.966	0.88	0.876	0.834	0.879		0.15	0.400621	0.436681	0.395636	0.359073	0.375641	0.34149	0.363842	0.39604	0.445575	0.424427	0.503725		0.403886	0.014028
5	0.2	1.032	0.998	0.959	0.937	0.957	0.949	0.968	0.88	0.873	0.844	0.888		0.2	0.400621	0.435808	0.394813	0.361776	0.377217	0.34149	0.364595	0.39604	0.444049	0.429517	0.508883		0.404982	0.0142625
6	0.25	1.032	0.993	0.958	0.937	0.957	0.95	0.977	0.888	0.881	0.844	0.901		0.25	0.400621	0.433624	0.394401	0.361776	0.377217	0.34185	0.367985	0.39964	0.448118	0.429517	0.516332		0.406462	0.0147122
7	0.3	1.031	0.981	0.947	0.926	0.957	0.953	0.976	0.889	0.884	0.833	0.885		0.3	0.400233	0.428384	0.389872	0.357529	0.377217	0.342929	0.367608	0.40009	0.449644	0.423919	0.507163		0.404054	0.0141026
8	0.35	1.034	0.992	0.956	0.938	0.968	0.967	0.986	0.896	0.895	0.85	0.903		0.35	0.401398	0.433188	0.393578	0.362162	0.381553	0.347967	0.371375	0.40324	0.455239	0.43257	0.517479		0.409068	0.0146047
9	0.4	1.028	0.98	0.948	0.938	0.959	0.958	0.981	0.9	0.899	0.847	0.9		0.4	0.399068	0.427948	0.390284	0.362162	0.378006	0.344728	0.369492	0.405041	0.457274	0.431043	0.515759		0.407346	0.0147258
10	0.45	1.02	0.984	0.954	0.948	0.956	0.959	0.984	0.905	0.903	0.853	0.912		0.45	0.395963	0.429694	0.392754	0.366023	0.376823	0.345088	0.370621	0.407291	0.459308	0.434097	0.522636		0.409118	0.0151894
11	0.5	1.027	0.988	0.968	0.954	0.963	0.964	0.989	0.903	0.9	0.851	0.914		0.5	0.39868	0.431441	0.398518	0.36834	0.379582	0.346887	0.372505	0.406391	0.457782	0.433079	0.523782		0.410635	0.0149363
12	0.55	1.017	0.979	0.959	0.945	0.958	0.96	0.982	0.902	0.897	0.852	0.913		0.55	0.394798	0.427511	0.394813	0.364865	0.377611	0.345448	0.369868	0.405941	0.456256	0.433588	0.523209		0.408537	0.0151169
13	0.6	1.023	0.982	0.965	0.946	0.961	0.963	0.985	0.904	0.9	0.854	0.915		0.6	0.397127	0.428821	0.397283	0.365251	0.378794	0.346528	0.370998	0.406841	0.457782	0.434606	0.524355		0.409853	0.0151307
14	0.65	1.018	0.98	0.964	0.949	0.956	0.962	0.982	0.902	0.904	0.859	0.937		0.65	0.395186	0.427948	0.396871	0.366409	0.376823	0.346168	0.369868	0.405941	0.459817	0.43715	0.536963		0.410831	0.016166
15	0.7	1.034	0.974	0.952	0.939	0.949	0.954	0.974	0.901	0.904	0.887	1.004		0.7	0.401398	0.425328	0.391931	0.362548	0.374064	0.343289	0.366855	0.405491	0.459817	0.451399	0.575358		0.414316	0.019504
16	0.75	1.05	0.987	0.963	0.949	0.955	0.961	0.987	0.909	0.917	0.894	0.966		0.75	0.407609	0.431004	0.396459	0.366409	0.376429	0.345808	0.371751	0.409091	0.466429	0.454962	0.553582		0.416321	0.0177415
17	0.8	1.033	0.99	0.966	0.954	0.961	0.964	0.983	0.905	0.912	0.88	0.939		0.8	0.401009	0.432314	0.397695	0.36834	0.378794	0.346887	0.370245	0.407291	0.463886	0.447837	0.538109		0.413855	0.0164024
18	0.85	1.025	0.986	0.958	0.945	0.954	0.955	0.979	0.904	0.904	0.864	0.928		0.85	0.397904	0.430568	0.394401	0.364865	0.376035	0.343649	0.368738	0.406841	0.459817	0.439695	0.531805		0.410392	0.0160445
19	0.9	1.02	0.984	0.961	0.943	0.954	0.954	0.979	0.903	0.905	0.862	0.916		0.9	0.395963	0.429694	0.395636	0.364093	0.376035	0.343289	0.368738	0.406391	0.460326	0.438677	0.524928		0.409434	0.0156025
20	0.95	1.015	0.976	0.958	0.945	0.947	0.95	0.977	0.909	0.905	0.854	0.919		0.95	0.394022	0.426201	0.394401	0.364865	0.373276	0.34185	0.367985	0.409091	0.460326	0.434606	0.526648		0.408479	0.0157471
21	1	1.002	0.96	0.952	0.913	0.953	0.957	0.977	0.908	0.908	0.858	0.908		1	0.388975	0.419214	0.391931	0.35251	0.375641	0.344368	0.367985	0.408641	0.461851	0.436641	0.520344		0.406191	0.0156171
22	1.05	1.019	0.973	0.952	0.937	0.951	0.951	0.975	0.901	0.908	0.859	0.918		1.05	0.395575	0.424891	0.391931	0.361776	0.374852	0.342209	0.367232	0.405491	0.461851	0.43715	0.526074		0.408094	0.0158462
23	1.1	1.02	0.976	0.953	0.935	0.949	0.946	0.971	0.893	0.9	0.85	0.903		1.1	0.395963	0.426201	0.392343	0.361004	0.374064	0.34041	0.365725	0.40189	0.457782	0.43257	0.517479		0.405948	0.0152243
24	1.15	1.05	1.012	0.975	0.967	0.983	0.98	0.981	0.896	0.901	0.859	0.906		1.15	0.407609	0.441921	0.4014	0.373359	0.387466	0.352645	0.369492	0.40324	0.458291	0.43715	0.519198		0.413797	0.0143843
25	1.2	1.101	1.056	1.006	0.982	1.018	1.011	1.005	0.914	0.927	0.875	0.917		1.2	0.427407	0.461135	0.414162	0.379151	0.401261	0.3638	0.378531	0.411341	0.471516	0.445293	0.525501		0.425373	0.0144161
26	1.25	1.149	1.097	1.053	1.023	1.056	1.038	1.045	0.959	0.937	0.893	0.921		1.25	0.44604	0.479039	0.433512	0.394981	0.41624	0.373516	0.393597	0.431593	0.476602	0.454453	0.527794		0.438851	0.0135109
27	1.3	1.174	1.116	1.074	1.031	1.094	1.079	1.088	1.004	0.957	0.909	0.92		1.3	0.455745	0.487336	0.442157	0.398069	0.431218	0.388269	0.409793	0.451845	0.486775	0.462595	0.527221		0.449184	0.0125899
28	1.35	1.18	1.123	1.113	1.076	1.104	1.093	1.097	1.022	0.972	0.923	0.94		1.35	0.458075	0.490393	0.458213	0.415444	0.43516	0.393307	0.413183	0.459946	0.494405	0.46972	0.538682		0.456957	0.0126275
29	1.4	1.205	1.143	1.13	1.076	1.125	1.113	1.155	1.059	0.992	0.936	0.944		1.4	0.46778	0.499127	0.465212	0.415444	0.443437	0.400504	0.435028	0.476598	0.504578	0.476336	0.540974		0.465911	0.0123375
30	1.45	1.226	1.162	1.149	1.094	1.154	1.127	1.188	1.095	1.007	0.959	0.954		1.45	0.475932	0.507424	0.473034	0.422394	0.454868	0.405542	0.447458	0.492799	0.512208	0.488041	0.546705		0.475128	0.0123673
31	1.5	1.253	1.177	1.171	1.138	1.176	1.139	1.194	1.09	1.015	0.992	0.98		1.5	0.486413	0.513974	0.482091	0.439382	0.46354	0.40986	0.449718	0.490549	0.516277	0.504835	0.561605		0.483477	0.0126231
32	1.55	1.257	1.178	1.194	1.158	1.192	1.157	1.192	1.083	1.028	1.005	1.023		1.55	0.487966	0.51441	0.49156	0.447104	0.469846	0.416337	0.448964	0.487399	0.522889	0.51145	0.586246		0.48947	0.0137404
33	1.6	1.28	1.194	1.187	1.153	1.205	1.168	1.227	1.106	1.048	1.027	1.042		1.6	0.496894	0.521397	0.488678	0.445174	0.47497	0.420295	0.462147	0.49775	0.533062	0.522646	0.597135		0.496377	0.0144334
34	1.65	1.26	1.19	1.184	1.166	1.199	1.171	1.232	1.103	1.058	1.032	1.07		1.65	0.48913	0.519651	0.487443	0.450193	0.472605	0.421375	0.46403	0.4964	0.538149	0.525191	0.613181		0.497941	0.0154434
35	1.7	1.26	1.199	1.192	1.149	1.212	1.179	1.248	1.132	1.086	1.067	1.101		1.7	0.48913	0.523581	0.490737	0.443629	0.47773	0.424253	0.470056	0.509451	0.552391	0.543003	0.630946		0.504992	0.0172215
36	1.75	1.231	1.185	1.187	1.147	1.207	1.182	1.253	1.142	1.104	1.072	1.128		1.75	0.477873	0.517467	0.488678	0.442857	0.475759	0.425333	0.47194	0.513951	0.561546	0.545547	0.646418		0.506125	0.0186404
37	1.8	1.225	1.2	1.196	1.127	1.223	1.191	1.277	1.172	1.132	1.082	1.14		1.8	0.475543	0.524017	0.492384	0.435135	0.482065	0.428571	0.480979	0.527453	0.575788	0.550636	0.653295		0.511443	0.0196206
38	1.85	1.232	1.188	1.191	1.134	1.208	1.181	1.264	1.159	1.128	1.085	1.147		1.85	0.478261	0.518777	0.490325	0.437838	0.476153	0.424973	0.476083	0.521602	0.573754	0.552163	0.657307		0.509749	0.0199727
39	1.9	1.212	1.194	1.184	1.148	1.203	1.174	1.251	1.149	1.124	1.081	1.161		1.9	0.470497	0.521397	0.487443	0.443243	0.474182	0.422454	0.471186	0.517102	0.571719	0.550127	0.66533		0.508607	0.0206012
40	1.95	1.212	1.187	1.182	1.125	1.213	1.179	1.267	1.171	1.139	1.09	1.166		1.95	0.470497	0.518341	0.48662	0.434363	0.478124	0.424253	0.477213	0.527003	0.579349	0.554707	0.668195		0.510788	0.021204
41	2	1.205	1.184	1.172	1.142	1.206	1.173	1.252	1.151	1.116	1.086	1.19		2	0.46778	0.517031	0.482503	0.440927	0.475365	0.422094	0.471563	0.518002	0.56765	0.552672	0.681948		0.508867	0.0218516
42	2.05	1.203	1.185	1.172	1.125	1.206	1.176	1.266	1.16	1.11	1.088	1.197		2.05	0.467003	0.517467	0.482503	0.434363	0.475365	0.423174	0.476836	0.522052	0.564598	0.55369	0.68596		0.509365	0.0222
43	2.1	1.205	1.188	1.17	1.136	1.203	1.173	1.255	1.15	1.114	1.089	1.216		2.1	0.46778	0.518777	0.48168	0.43861	0.474182	0.422094	0.472693	0.517552	0.566633	0.554198	0.696848		0.510095	0.0230198
44	2.15	1.201	1.183	1.173	1.144	1.2	1.172	1.244	1.158	1.119	1.09	1.226		2.15	0.466227	0.516594	0.482915	0.441699	0.473	0.421734	0.46855	0.521152	0.569176	0.554707	0.702579		0.510757	0.0235375
45	2.2	1.198	1.181	1.166	1.118	1.2	1.17	1.255	1.172	1.12	1.097	1.222		2.2	0.465062	0.515721	0.480033	0.43166	0.473	0.421015	0.472693	0.527453	0.569685	0.55827	0.700287		0.510443	0.0237736
46	2.25	1.194	1.184	1.164	1.139	1.197	1.168	1.247	1.155	1.115	1.091	1.224		2.25	0.463509	0.517031	0.47921	0.439768	0.471817	0.420295	0.46968	0.519802	0.567141	0.555216	0.701433		0.509537	0.0236012
47	2.3	1.187	1.177	1.158	1.113	1.188	1.157	1.247	1.164	1.115	1.097	1.211		2.3	0.460792	0.513974	0.476739	0.42973	0.46827	0.416337	0.46968	0.523852	0.567141	0.55827	0.693983		0.507161	0.0236787
48	2.35	1.196	1.179	1.157	1.106	1.185	1.155	1.246	1.173	1.124	1.111	1.194		2.35	0.464286	0.514847	0.476328	0.427027	0.467087	0.415617	0.469303	0.527903	0.571719	0.565394	0.684241		0.507614	0.0233614
49	2.4	1.189	1.174	1.15	1.081	1.187	1.15	1.239	1.181	1.127	1.102	1.182		2.4	0.461568	0.512664	0.473446	0.417375	0.467875	0.413818	0.466667	0.531503	0.573245	0.560814	0.677364		0.505122	0.0233482
50	2.45	1.202	1.171	1.149	1.094	1.192	1.155	1.243	1.175	1.118	1.09	1.172		2.45	0.466615	0.511354	0.473034	0.422394	0.469846	0.415617	0.468173	0.528803	0.568667	0.554707	0.671633		0.504622	0.0223193
51	2.5	1.202	1.167	1.147	1.081	1.193	1.151	1.241	1.176	1.129	1.084	1.158		2.5	0.466615	0.509607	0.472211	0.417375	0.47024	0.414178	0.46742	0.529253	0.574262	0.551654	0.66361		0.503311	0.0221165
52	2.55	1.214	1.176	1.15	1.099	1.186	1.149	1.236	1.16	1.114	1.089	1.164		2.55	0.471273	0.513537	0.473446	0.424324	0.467481	0.413458	0.465537	0.522052	0.566633	0.554198	0.667049		0.503544	0.0219101
53	2.6	1.219	1.177	1.145	1.096	1.175	1.141	1.224	1.159	1.108	1.076	1.156		2.6	0.473214	0.513974	0.471387	0.423166	0.463145	0.410579	0.461017	0.521602	0.563581	0.547583	0.662464		0.501065	0.021672
54	2.65	1.238	1.179	1.157	1.097	1.181	1.149	1.227	1.15	1.104	1.078	1.159		2.65	0.48059	0.514847	0.476328	0.423552	0.46551	0.413458	0.462147	0.517552	0.561546	0.548601	0.664183		0.502574	0.0214169
55	2.7	1.245	1.179	1.149	1.1	1.174	1.143	1.223	1.152	1.102	1.082	1.168		2.7	0.483307	0.514847	0.473034	0.42471	0.462751	0.411299	0.46064	0.518452	0.560529	0.550636	0.669341		0.502686	0.0219223
56	2.75	1.238	1.184	1.147	1.098	1.169	1.136	1.22	1.143	1.098	1.076	1.176		2.75	0.48059	0.517031	0.472211	0.423938	0.46078	0.40878	0.45951	0.514401	0.558494	0.547583	0.673926		0.501568	0.022328
57	2.8	1.245	1.189	1.147	1.101	1.172	1.134	1.218	1.135	1.093	1.073	1.172		2.8	0.483307	0.519214	0.472211	0.425097	0.461963	0.40806	0.458757	0.510801	0.555951	0.546056	0.671633		0.501186	0.0220417
58	2.85	1.241	1.185	1.138	1.096	1.171	1.127	1.218	1.139	1.099	1.079	1.158		2.85	0.481755	0.517467	0.468506	0.423166	0.461569	0.405542	0.458757	0.512601	0.559003	0.549109	0.66361		0.500099	0.021837
59	2.9	1.234	1.185	1.145	1.11	1.162	1.132	1.208	1.126	1.096	1.076	1.156		2.9	0.479037	0.517467	0.471387	0.428571	0.458021	0.407341	0.454991	0.506751	0.557477	0.547583	0.662464		0.49919	0.0215406
60	2.95	1.237	1.187	1.149	1.113	1.17	1.134	1.212	1.126	1.096	1.081	1.153		2.95	0.480202	0.518341	0.473034	0.42973	0.461175	0.40806	0.456497	0.506751	0.557477	0.550127	0.660745		0.500194	0.0213087
61	3	1.235	1.179	1.149	1.083	1.177	1.138	1.221	1.138	1.093	1.076	1.134		3	0.479425	0.514847	0.473034	0.418147	0.463934	0.4095	0.459887	0.512151	0.555951	0.547583	0.649857		0.498574	0.0207031
62	3.05	1.241	1.182	1.153	1.091	1.174	1.133	1.22	1.139	1.104	1.079	1.141		3.05	0.481755	0.516157	0.474681	0.421236	0.462751	0.407701	0.45951	0.512601	0.561546	0.549109	0.653868		0.500083	0.0211098
63	3.1	1.239	1.189	1.143	1.107	1.168	1.126	1.212	1.124	1.094	1.08	1.141		3.1	0.480978	0.519214	0.470564	0.427413	0.460386	0.405182	0.456497	0.505851	0.55646	0.549618	0.653868		0.49873	0.0210325
64	3.15	1.238	1.213	1.144	1.099	1.17	1.129	1.214	1.133	1.103	1.08	1.147		3.15	0.48059	0.529694	0.470976	0.424324	0.461175	0.406261	0.45725	0.509901	0.561038	0.549618	0.657307		0.500739	0.0215268
65	3.2	1.244	1.203	1.141	1.081	1.171	1.125	1.214	1.133	1.097	1.071	1.141		3.2	0.482919	0.525328	0.469741	0.417375	0.461569	0.404822	0.45725	0.509901	0.557986	0.545038	0.653868		0.498709	0.0213595
66	3.25	1.231	1.184	1.14	1.085	1.173	1.124	1.214	1.132	1.095	1.073	1.136		3.25	0.477873	0.517031	0.469329	0.418919	0.462357	0.404462	0.45725	0.509451	0.556968	0.546056	0.651003		0.497336	0.0210726
67	3.3	1.235	1.175	1.137	1.09	1.17	1.119	1.208	1.136	1.097	1.071	1.141		3.3	0.479425	0.5131	0.468094	0.420849	0.461175	0.402663	0.454991	0.511251	0.557986	0.545038	0.653868		0.497131	0.0213175
68	3.35	1.233	1.174	1.142	1.089	1.172	1.123	1.216	1.138	1.096	1.069	1.141		3.35	0.478649	0.512664	0.470152	0.420463	0.461963	0.404102	0.458004	0.512151	0.557477	0.54402	0.653868		0.497592	0.0211576
69	3.4	1.232	1.163	1.138	1.079	1.171	1.115	1.201	1.139	1.094	1.071	1.151		3.4	0.478261	0.50786	0.468506	0.416602	0.461569	0.401223	0.452354	0.512601	0.55646	0.545038	0.659599		0.49637	0.0218855
70	3.45	1.212	1.165	1.142	1.094	1.158	1.119	1.201	1.127	1.098	1.077	1.153		3.45	0.470497	0.508734	0.470152	0.422394	0.456445	0.402663	0.452354	0.507201	0.558494	0.548092	0.660745		0.496161	0.0219431
71	3.5	1.237	1.165	1.136	1.079	1.161	1.124	1.205	1.125	1.095	1.076	1.147		3.5	0.480202	0.508734	0.467682	0.416602	0.457627	0.404462	0.453861	0.506301	0.556968	0.547583	0.657307		0.496121	0.0216687
72	3.55	1.225	1.156	1.132	1.067	1.162	1.128	1.196	1.128	1.094	1.07	1.149		3.55	0.475543	0.504803	0.466035	0.411969	0.458021	0.405901	0.450471	0.507651	0.55646	0.544529	0.658453		0.494531	0.0218677
73	3.6	1.223	1.154	1.13	1.09	1.151	1.119	1.186	1.116	1.086	1.066	1.147		3.6	0.474767	0.50393	0.465212	0.420849	0.453685	0.402663	0.446704	0.50225	0.552391	0.542494	0.657307		0.492932	0.0216036
74	3.65	1.214	1.156	1.131	1.079	1.15	1.126	1.202	1.131	1.091	1.073	1.154		3.65	0.471273	0.504803	0.465624	0.416602	0.453291	0.405182	0.452731	0.509001	0.554934	0.546056	0.661318		0.49462	0.0220159
75	3.7	1.22	1.161	1.135	1.075	1.161	1.128	1.208	1.133	1.093	1.075	1.145		3.7	0.473602	0.506987	0.46727	0.415058	0.457627	0.405901	0.454991	0.509901	0.555951	0.547074	0.65616		0.495502	0.0215988
76	3.75	1.216	1.16	1.129	1.081	1.157	1.116	1.199	1.136	1.097	1.078	1.146		3.75	0.47205	0.50655	0.4648	0.417375	0.45605	0.401583	0.451601	0.511251	0.557986	0.548601	0.656734		0.494962	0.0219477
77	3.8	1.351	1.189	1.126	1.033	1.194	1.087	1.223	1.159	1.104	1.073	1.035		3.8	0.524457	0.519214	0.463565	0.398842	0.470635	0.391148	0.46064	0.521602	0.561546	0.546056	0.593123		0.49553	0.0194506
78	3.85	2.147	2.008	1.874	1.994	2.101	2.053	1.903	1.729	1.675	1.62	1.544		3.85	0.833463	0.876856	0.771511	0.769884	0.828143	0.738755	0.716761	0.778128	0.851984	0.824427	0.884814		0.806793	0.0167006
79	3.9	2.177	2.023	1.925	1.988	2.105	2.077	1.899	1.784	1.726	1.708	1.623		3.9	0.845109	0.883406	0.792507	0.767568	0.82972	0.747391	0.715254	0.80288	0.877925	0.869211	0.930086		0.823732	0.019663
80	3.95	2.174	2.02	1.929	2.002	2.083	2.06	1.875	1.78	1.715	1.705	1.627		3.95	0.843944	0.882096	0.794154	0.772973	0.821048	0.741274	0.706215	0.80108	0.87233	0.867684	0.932378		0.82138	0.0200981
81	4	2.151	1.992	1.908	1.977	2.061	2.029	1.822	1.765	1.719	1.679	1.613		4	0.835016	0.869869	0.785508	0.76332	0.812377	0.730119	0.686252	0.794329	0.874364	0.854453	0.924355		0.811815	0.0209098
82	4.05	2.131	1.985	1.904	1.966	2.034	2.018	1.796	1.733	1.708	1.652	1.585		4.05	0.827252	0.866812	0.783862	0.759073	0.801734	0.72616	0.67646	0.779928	0.868769	0.840712	0.908309		0.803552	0.020503
83	4.1	2.103	1.975	1.891	1.947	2.007	1.994	1.781	1.705	1.669	1.615	1.563		4.1	0.816382	0.862445	0.77851	0.751737	0.791092	0.717524	0.67081	0.767327	0.848932	0.821883	0.895702		0.79294	0.0197903
84	4.15	2.062	1.936	1.87	1.958	1.984	1.974	1.741	1.668	1.63	1.585	1.558		4.15	0.800466	0.845415	0.769864	0.755985	0.782026	0.710327	0.655744	0.750675	0.829095	0.806616	0.892837		0.781732	0.0196221
85	4.2	2.042	1.913	1.82	1.867	1.956	1.946	1.779	1.665	1.616	1.576	1.532		4.2	0.792702	0.835371	0.74928	0.720849	0.770989	0.700252	0.670056	0.749325	0.821974	0.802036	0.877937		0.771888	0.0186485
86	4.25	2.034	1.9	1.796	1.817	1.946	1.931	1.779	1.677	1.61	1.563	1.526		4.25	0.789596	0.829694	0.739399	0.701544	0.767048	0.694854	0.670056	0.754725	0.818922	0.79542	0.874499		0.766887	0.0189018
87	4.3	2.009	1.885	1.79	1.833	1.905	1.898	1.725	1.643	1.586	1.547	1.544		4.3	0.779891	0.823144	0.736929	0.707722	0.750887	0.682979	0.649718	0.739424	0.806714	0.787277	0.884814		0.759045	0.0201683
88	4.35	2.002	1.872	1.78	1.808	1.886	1.878	1.712	1.632	1.563	1.535	1.535		4.35	0.777174	0.817467	0.732812	0.698069	0.743398	0.675783	0.644821	0.734473	0.795015	0.78117	0.879656		0.752713	0.0201958
89	4.4	1.977	1.862	1.752	1.754	1.864	1.86	1.702	1.625	1.544	1.511	1.507		4.4	0.767469	0.8131	0.721284	0.67722	0.734726	0.669306	0.641055	0.731323	0.785351	0.768957	0.86361		0.743036	0.0198527
90	4.45	1.967	1.839	1.735	1.72	1.839	1.836	1.679	1.612	1.524	1.49	1.48		4.45	0.763587	0.803057	0.714286	0.664093	0.724872	0.660669	0.632392	0.725473	0.775178	0.75827	0.848138		0.733638	0.0195607
91	4.5	1.933	1.82	1.719	1.687	1.819	1.82	1.662	1.589	1.511	1.471	1.471		4.5	0.750388	0.79476	0.707699	0.651351	0.716989	0.654912	0.625989	0.715122	0.768566	0.748601	0.84298		0.725214	0.0196528
92	4.55	1.883	1.78	1.68	1.627	1.786	1.783	1.649	1.591	1.499	1.463	1.452		4.55	0.730978	0.777293	0.691643	0.628185	0.703981	0.641598	0.621092	0.716022	0.762462	0.744529	0.832092		0.713625	0.0198543
93	4.6	1.861	1.768	1.658	1.637	1.74	1.751	1.614	1.535	1.465	1.454	1.455		4.6	0.722438	0.772052	0.682585	0.632046	0.685849	0.630083	0.60791	0.690819	0.745168	0.739949	0.833811		0.703883	0.0203705
94	4.65	1.859	1.738	1.636	1.601	1.713	1.723	1.6	1.538	1.468	1.439	1.442		4.65	0.721661	0.758952	0.673528	0.618147	0.675207	0.620007	0.602637	0.692169	0.746694	0.732316	0.826361		0.697062	0.0206698
95	4.7	1.787	1.681	1.578	1.552	1.645	1.657	1.549	1.489	1.421	1.395	1.404		4.7	0.693711	0.734061	0.64965	0.599228	0.648404	0.596258	0.583427	0.670117	0.722787	0.709924	0.804585		0.673832	0.0204094
96	4.75	1.759	1.645	1.526	1.494	1.597	1.606	1.513	1.462	1.415	1.385	1.389		4.75	0.682842	0.718341	0.628242	0.576834	0.629484	0.577906	0.569868	0.657966	0.719736	0.704835	0.795989		0.660185	0.0216837
97	4.8	1.729	1.592	1.464	1.426	1.535	1.537	1.478	1.422	1.364	1.355	1.375		4.8	0.671196	0.695197	0.602717	0.550579	0.605045	0.553077	0.556685	0.639964	0.693795	0.689567	0.787966		0.640526	0.0226367
98	4.85	1.678	1.536	1.41	1.371	1.481	1.478	1.434	1.381	1.336	1.323	1.348		4.85	0.651398	0.670742	0.580486	0.529344	0.58376	0.531846	0.540113	0.621512	0.679552	0.673282	0.772493		0.621321	0.0230473
99	4.9	1.63	1.487	1.352	1.342	1.426	1.415	1.398	1.341	1.299	1.297	1.341		4.9	0.632764	0.649345	0.556608	0.518147	0.562081	0.509176	0.526554	0.60351	0.660732	0.660051	0.768481		0.604314	0.0238672
100	4.95	1.547	1.413	1.299	1.262	1.377	1.36	1.362	1.307	1.263	1.25	1.292		4.95	0.600543	0.617031	0.534788	0.487259	0.542767	0.489385	0.512994	0.588209	0.642421	0.636132	0.740401		0.581085	0.0232292
101	5	1.474	1.358	1.257	1.213	1.331	1.318	1.316	1.266	1.227	1.222	1.265		5	0.572205	0.593013	0.517497	0.46834	0.524635	0.474271	0.495669	0.569757	0.62411	0.621883	0.724928		0.562392	0.0232298
102	5.05	1.421	1.315	1.218	1.178	1.288	1.273	1.286	1.239	1.208	1.198	1.24		5.05	0.55163	0.574236	0.501441	0.454826	0.507686	0.458078	0.484369	0.557606	0.614446	0.609669	0.710602		0.54769	0.0233665
103	5.1	1.37	1.277	1.189	1.135	1.262	1.241	1.268	1.225	1.186	1.173	1.22		5.1	0.531832	0.557642	0.489502	0.438224	0.497438	0.446564	0.477589	0.551305	0.603255	0.596947	0.69914		0.535403	0.0233916
104	5.15	1.334	1.251	1.174	1.159	1.238	1.218	1.234	1.194	1.163	1.156	1.215		5.15	0.517857	0.546288	0.483326	0.44749	0.487978	0.438287	0.464783	0.537354	0.591556	0.588295	0.696275		0.527226	0.0230875
105	5.2	1.285	1.207	1.148	1.098	1.213	1.187	1.226	1.194	1.149	1.137	1.189		5.2	0.498835	0.527074	0.472622	0.423938	0.478124	0.427132	0.46177	0.537354	0.584435	0.578626	0.681375		0.515572	0.0232488
106	5.25	1.263	1.191	1.137	1.081	1.205	1.172	1.217	1.181	1.139	1.122	1.179		5.25	0.490295	0.520087	0.468094	0.417375	0.47497	0.421734	0.45838	0.531503	0.579349	0.570992	0.675645		0.509857	0.0231473
107	5.3	1.248	1.186	1.134	1.088	1.197	1.158	1.2	1.164	1.136	1.116	1.172		5.3	0.484472	0.517904	0.466859	0.420077	0.471817	0.416697	0.451977	0.523852	0.577823	0.567939	0.671633		0.506459	0.0230272
108	5.35	1.247	1.176	1.138	1.092	1.186	1.151	1.187	1.155	1.125	1.111	1.167		5.35	0.484084	0.513537	0.468506	0.421622	0.467481	0.414178	0.447081	0.519802	0.572228	0.565394	0.668768		0.50388	0.0227631
109	5.4	1.217	1.166	1.121	1.053	1.177	1.137	1.188	1.158	1.127	1.107	1.155		5.4	0.472438	0.50917	0.461507	0.406564	0.463934	0.40914	0.447458	0.521152	0.573245	0.563359	0.661891		0.499078	0.0232377
110	5.45	1.197	1.153	1.119	1.079	1.163	1.133	1.158	1.143	1.118	1.108	1.164		5.45	0.464674	0.503493	0.460683	0.416602	0.458415	0.407701	0.436158	0.514401	0.568667	0.563868	0.667049		0.496519	0.0235216
111	5.5	1.175	1.146	1.105	1.053	1.167	1.14	1.161	1.163	1.131	1.109	1.158		5.5	0.456134	0.500437	0.45492	0.406564	0.459992	0.41022	0.437288	0.523402	0.57528	0.564377	0.66361		0.495657	0.0239698
112	5.55	1.192	1.166	1.129	1.094	1.192	1.174	1.184	1.172	1.138	1.122	1.161		5.55	0.462733	0.50917	0.4648	0.422394	0.469846	0.422454	0.445951	0.527453	0.57884	0.570992	0.66533		0.503633	0.0229182
113	5.6	1.183	1.174	1.128	1.095	1.195	1.174	1.18	1.189	1.156	1.138	1.171		5.6	0.459239	0.512664	0.464389	0.42278	0.471029	0.422454	0.444444	0.535104	0.587996	0.579135	0.67106		0.50639	0.0239398
114	5.65	1.19	1.182	1.135	1.093	1.191	1.168	1.176	1.188	1.15	1.13	1.168		5.65	0.461957	0.516157	0.46727	0.422008	0.469452	0.420295	0.442938	0.534653	0.584944	0.575064	0.669341		0.505825	0.0236947
115	5.7	1.168	1.162	1.113	1.066	1.176	1.157	1.172	1.181	1.153	1.128	1.169		5.7	0.453416	0.507424	0.458213	0.411583	0.46354	0.416337	0.441431	0.531503	0.58647	0.574046	0.669914		0.501262	0.0245604
116	5.75	1.157	1.147	1.11	1.07	1.174	1.158	1.165	1.173	1.133	1.116	1.177		5.75	0.449146	0.500873	0.456978	0.413127	0.462751	0.416697	0.438795	0.527903	0.576297	0.567939	0.674499		0.498637	0.0244396
117	5.8	1.169	1.147	1.111	1.079	1.17	1.155	1.157	1.175	1.14	1.129	1.184		5.8	0.453804	0.500873	0.45739	0.416602	0.461175	0.415617	0.435782	0.528803	0.579858	0.574555	0.67851		0.50027	0.0249158
118	5.85	1.149	1.132	1.106	1.06	1.164	1.147	1.15	1.172	1.133	1.118	1.18		5.85	0.44604	0.494323	0.455331	0.409266	0.45881	0.412738	0.433145	0.527453	0.576297	0.568957	0.676218		0.496234	0.0250779
119	5.9	1.142	1.143	1.106	1.055	1.16	1.149	1.148	1.178	1.142	1.125	1.168		5.9	0.443323	0.499127	0.455331	0.407336	0.457233	0.413458	0.432392	0.530153	0.580875	0.572519	0.669341		0.496463	0.0250331
120	5.95	1.154	1.136	1.104	1.074	1.159	1.145	1.143	1.166	1.132	1.116	1.162		5.95	0.447981	0.49607	0.454508	0.414672	0.456839	0.412019	0.430508	0.524752	0.575788	0.567939	0.665903		0.49518	0.0242609
121	6	1.153	1.143	1.109	1.081	1.171	1.158	1.151	1.174	1.141	1.123	1.17		6	0.447593	0.499127	0.456566	0.417375	0.461569	0.416697	0.433522	0.528353	0.580366	0.571501	0.670487		0.498469	0.0244413
122	6.05	1.226	1.189	1.15	1.079	1.203	1.174	1.168	1.194	1.16	1.131	1.167		6.05	0.475932	0.519214	0.473446	0.416602	0.474182	0.422454	0.439925	0.537354	0.590031	0.575573	0.668768		0.508498	0.0237023
123	6.1	1.409	1.322	1.285	1.262	1.362	1.33	1.274	1.243	1.161	1.095	1.115		6.1	0.546972	0.577293	0.529024	0.487259	0.536855	0.478589	0.479849	0.559406	0.590539	0.557252	0.638968		0.543819	0.0149555
124	6.15	1.495	1.462	1.518	1.749	1.632	1.541	1.304	1.347	1.178	1.117	1.064		6.15	0.580357	0.638428	0.624949	0.67529	0.643279	0.554516	0.491149	0.606211	0.599186	0.568448	0.609742		0.599232	0.0150958
125	6.2	1.796	1.696	1.668	1.644	1.783	1.9	1.79	1.803	1.526	1.412	1.396		6.2	0.697205	0.740611	0.686702	0.634749	0.702799	0.683699	0.6742	0.811431	0.776195	0.718575	0.8		0.720561	0.0167735
126	6.25	1.913	1.76	1.754	1.665	1.878	2.013	1.956	1.862	1.577	1.477	1.466		6.25	0.742624	0.768559	0.722108	0.642857	0.740244	0.724361	0.736723	0.837984	0.802136	0.751654	0.840115		0.755397	0.0170154
127	6.3	2.058	1.815	1.839	1.72	1.965	2.084	2.077	1.928	1.634	1.526	1.509		6.3	0.798913	0.792576	0.757102	0.664093	0.774537	0.74991	0.782298	0.867687	0.831129	0.77659	0.864756		0.787236	0.0171458
128	6.35	2.176	1.879	1.935	1.773	2.072	2.198	2.166	1.988	1.676	1.544	1.524		6.35	0.84472	0.820524	0.796624	0.684556	0.816713	0.790932	0.815819	0.894689	0.852492	0.785751	0.873352		0.816016	0.0167482
129	6.4	2.233	1.909	1.994	1.824	2.141	2.278	2.226	1.98	1.684	1.545	1.52		6.4	0.866848	0.833624	0.820914	0.704247	0.84391	0.819719	0.838418	0.891089	0.856562	0.78626	0.87106		0.830241	0.0152772
130	6.45	2.328	1.985	2.058	1.859	2.214	2.341	2.3	2.021	1.718	1.585	1.556		6.45	0.903727	0.866812	0.847262	0.717761	0.872684	0.842389	0.86629	0.909541	0.873856	0.806616	0.891691		0.854421	0.0162429
131	6.5	2.345	2.015	2.091	1.89	2.277	2.394	2.342	2.044	1.748	1.603	1.549		6.5	0.910326	0.879913	0.860848	0.72973	0.897517	0.861461	0.882109	0.919892	0.889115	0.815776	0.887679		0.866761	0.0160829
132	6.55	2.407	2.044	2.136	1.938	2.315	2.467	2.37	2.043	1.767	1.613	1.561		6.55	0.934394	0.892576	0.879374	0.748263	0.912495	0.887729	0.892655	0.919442	0.898779	0.820865	0.894556		0.880103	0.0157725
133	6.6	2.402	2.067	2.14	1.92	2.32	2.492	2.405	2.058	1.803	1.634	1.539		6.6	0.932453	0.90262	0.881021	0.741313	0.914466	0.896725	0.905838	0.926193	0.917091	0.831552	0.881948		0.884656	0.0165846
134	6.65	2.425	2.092	2.181	1.955	2.338	2.524	2.425	2.037	1.79	1.637	1.532		6.65	0.941382	0.913537	0.8979	0.754826	0.921561	0.90824	0.913371	0.916742	0.910478	0.833079	0.877937		0.889914	0.0159326
135	6.7	2.468	2.123	2.213	1.972	2.374	2.562	2.446	2.056	1.829	1.677	1.563		6.7	0.958075	0.927074	0.911075	0.76139	0.935751	0.921914	0.921281	0.925293	0.930315	0.853435	0.895702		0.903755	0.0163047
136	6.75	2.491	2.149	2.233	1.981	2.396	2.584	2.481	2.079	1.838	1.686	1.564		6.75	0.967003	0.938428	0.919308	0.764865	0.944423	0.929831	0.934463	0.935644	0.934893	0.858015	0.896275		0.911195	0.0169323
137	6.8	2.509	2.184	2.246	1.995	2.424	2.608	2.496	2.096	1.858	1.714	1.571		6.8	0.973991	0.953712	0.92466	0.77027	0.955459	0.938467	0.940113	0.943294	0.945066	0.872265	0.900287		0.91978	0.0171445
138	6.85	2.492	2.204	2.24	1.985	2.411	2.63	2.533	2.096	1.87	1.729	1.57		6.85	0.967391	0.962445	0.92219	0.766409	0.950335	0.946384	0.954049	0.943294	0.95117	0.879898	0.899713		0.922116	0.0175558
139	6.9	2.512	2.199	2.258	1.994	2.443	2.654	2.546	2.117	1.873	1.731	1.59		6.9	0.975155	0.960262	0.929601	0.769884	0.962948	0.95502	0.958945	0.952745	0.952696	0.880916	0.911175		0.928123	0.0178118
140	6.95	2.483	2.191	2.251	1.985	2.461	2.673	2.565	2.133	1.876	1.752	1.595		6.95	0.963898	0.956769	0.926719	0.766409	0.970043	0.961857	0.966102	0.959946	0.954222	0.891603	0.91404		0.930146	0.0180334
141	7	2.502	2.219	2.279	1.984	2.498	2.714	2.615	2.157	1.9	1.773	1.61		7	0.971273	0.968996	0.938246	0.766023	0.984628	0.97661	0.984934	0.970747	0.966429	0.90229	0.922636		0.941165	0.0192574
142	7.05	2.512	2.234	2.286	1.997	2.528	2.737	2.641	2.144	1.913	1.786	1.627		7.05	0.975155	0.975546	0.941128	0.771042	0.996453	0.984887	0.994727	0.964896	0.973042	0.908906	0.932378		0.947105	0.019406
143	7.1	2.465	2.209	2.276	1.956	2.533	2.74	2.655	2.168	1.912	1.796	1.616		7.1	0.95691	0.964629	0.937011	0.755212	0.998423	0.985966	1	0.975698	0.972533	0.913995	0.926074		0.944223	0.0207103
144	7.15	2.576	2.29	2.387	2.37	2.505	2.723	2.465	2.205	1.939	1.823	1.639		7.15	1	1	0.982709	0.915058	0.987387	0.979849	0.928437	0.992349	0.986267	0.927735	0.939255		0.967186	0.00977728
145	7.2	2.469	2.275	2.411	2.419	2.491	2.732	2.41	2.188	1.915	1.794	1.667		7.2	0.958463	0.99345	0.99259	0.933977	0.981868	0.983087	0.907721	0.984698	0.974059	0.912977	0.955301		0.961654	0.00934961
146	7.25	2.471	2.28	2.404	2.458	2.492	2.73	2.424	2.187	1.915	1.813	1.68		7.25	0.959239	0.995633	0.989708	0.949035	0.982263	0.982368	0.912994	0.984248	0.974059	0.922646	0.962751		0.964995	0.00819791
147	7.3	2.481	2.27	2.414	2.47	2.495	2.742	2.415	2.195	1.919	1.817	1.682		7.3	0.963121	0.991266	0.993825	0.953668	0.983445	0.986686	0.909605	0.987849	0.976094	0.924682	0.963897		0.96674	0.00840481
148	7.35	2.464	2.284	2.418	2.476	2.514	2.761	2.438	2.184	1.902	1.824	1.676		7.35	0.956522	0.99738	0.995471	0.955985	0.990934	0.993523	0.918267	0.982898	0.967447	0.928244	0.960458		0.967921	0.00820437
149	7.4	2.449	2.275	2.429	2.487	2.52	2.773	2.423	2.191	1.921	1.838	1.681		7.4	0.950699	0.99345	1	0.960232	0.993299	0.997841	0.912618	0.986049	0.977111	0.935369	0.963324		0.969999	0.00857086
150	7.45	2.44	2.26	2.428	2.486	2.514	2.759	2.408	2.189	1.925	1.843	1.681		7.45	0.947205	0.9869	0.999588	0.959846	0.990934	0.992803	0.906968	0.985149	0.979145	0.937913	0.963324		0.968161	0.00856265
151	7.5	2.453	2.26	2.412	2.514	2.507	2.764	2.413	2.222	1.924	1.837	1.685		7.5	0.952252	0.9869	0.993001	0.970656	0.988175	0.994602	0.908851	1	0.978637	0.93486	0.965616		0.970323	0.00854526
152	7.55	2.443	2.271	2.409	2.497	2.51	2.762	2.435	2.198	1.913	1.852	1.688		7.55	0.94837	0.991703	0.991766	0.964093	0.989358	0.993883	0.917137	0.989199	0.973042	0.942494	0.967335		0.969853	0.00758492
153	7.6	2.43	2.259	2.428	2.524	2.52	2.77	2.422	2.213	1.926	1.857	1.697		7.6	0.943323	0.986463	0.999588	0.974517	0.993299	0.996761	0.912241	0.99595	0.979654	0.945038	0.972493		0.972666	0.0084161
154	7.65	2.441	2.257	2.409	2.498	2.513	2.763	2.418	2.218	1.933	1.854	1.695		7.65	0.947593	0.98559	0.991766	0.964479	0.99054	0.994243	0.910734	0.9982	0.983215	0.943511	0.971347		0.97102	0.00822038
155	7.7	2.447	2.249	2.406	2.532	2.515	2.764	2.41	2.222	1.935	1.86	1.706		7.7	0.949922	0.982096	0.990531	0.977606	0.991328	0.994602	0.907721	1	0.984232	0.946565	0.97765		0.972932	0.00830297
156	7.75	2.449	2.277	2.422	2.532	2.526	2.771	2.428	2.22	1.93	1.866	1.698		7.75	0.950699	0.994323	0.997118	0.977606	0.995664	0.997121	0.914501	0.9991	0.981689	0.949618	0.973066		0.9755	0.0081504
157	7.8	2.443	2.261	2.427	2.555	2.535	2.774	2.415	2.215	1.932	1.874	1.719		7.8	0.94837	0.987336	0.999177	0.986486	0.999212	0.998201	0.909605	0.99685	0.982706	0.95369	0.9851		0.976976	0.0085434
158	7.85	2.45	2.263	2.418	2.549	2.529	2.77	2.412	2.218	1.94	1.882	1.721		7.85	0.951087	0.98821	0.995471	0.98417	0.996847	0.996761	0.908475	0.9982	0.986775	0.957761	0.986246		0.977273	0.00835012
159	7.9	2.437	2.275	2.42	2.553	2.532	2.779	2.43	2.213	1.938	1.878	1.706		7.9	0.94604	0.99345	0.996295	0.985714	0.998029	1	0.915254	0.99595	0.985758	0.955725	0.97765		0.977261	0.00817378
160	7.95	2.444	2.279	2.422	2.556	2.533	2.779	2.421	2.2	1.939	1.89	1.714		7.95	0.948758	0.995197	0.997118	0.986873	0.998423	1	0.911864	0.990099	0.986267	0.961832	0.982235		0.97806	0.00818208
161	8	2.42	2.244	2.415	2.547	2.526	2.779	2.404	2.185	1.931	1.878	1.714		8	0.939441	0.979913	0.994236	0.983398	0.995664	1	0.905461	0.983348	0.982197	0.955725	0.982235		0.972874	0.00858774
162	8.05	2.436	2.27	2.419	2.569	2.529	2.776	2.422	2.187	1.936	1.907	1.722		8.05	0.945652	0.991266	0.995883	0.991892	0.996847	0.99892	0.912241	0.984248	0.984741	0.970483	0.986819		0.97809	0.00801756
163	8.1	2.433	2.258	2.412	2.582	2.515	2.772	2.414	2.186	1.931	1.902	1.714		8.1	0.944488	0.986026	0.993001	0.996911	0.991328	0.997481	0.909228	0.983798	0.982197	0.967939	0.982235		0.975876	0.00807786
164	8.15	2.431	2.254	2.423	2.57	2.537	2.777	2.41	2.191	1.938	1.913	1.72		8.15	0.943711	0.984279	0.99753	0.992278	1	0.99928	0.907721	0.986049	0.985758	0.973537	0.985673		0.977802	0.00846367
165	8.2	2.443	2.243	2.411	2.552	2.515	2.767	2.391	2.191	1.942	1.93	1.72		8.2	0.94837	0.979476	0.99259	0.985328	0.991328	0.995682	0.900565	0.986049	0.987792	0.982188	0.985673		0.975913	0.00843281
166	8.25	2.454	2.255	2.422	2.585	2.519	2.775	2.407	2.184	1.943	1.917	1.722		8.25	0.95264	0.984716	0.997118	0.998069	0.992905	0.998561	0.906591	0.982898	0.988301	0.975573	0.986819		0.978563	0.00820805
167	8.3	2.433	2.261	2.407	2.57	2.515	2.751	2.418	2.188	1.944	1.924	1.725		8.3	0.944488	0.987336	0.990943	0.992278	0.991328	0.989924	0.910734	0.984698	0.98881	0.979135	0.988539		0.97711	0.00779946
168	8.35	2.425	2.265	2.42	2.578	2.516	2.772	2.426	2.185	1.966	1.946	1.741		8.35	0.941382	0.989083	0.996295	0.995367	0.991723	0.997481	0.913748	0.983348	1	0.990331	0.997708		0.981497	0.00837461
169	8.4	2.411	2.248	2.395	2.559	2.495	2.739	2.412	2.181	1.946	1.94	1.734		8.4	0.935947	0.981659	0.986002	0.988031	0.983445	0.985606	0.908475	0.981548	0.989827	0.987277	0.993696		0.974683	0.00810817
170	8.45	2.422	2.239	2.408	2.569	2.502	2.758	2.404	2.181	1.947	1.954	1.744		8.45	0.940217	0.977729	0.991354	0.991892	0.986204	0.992443	0.905461	0.981548	0.990336	0.994402	0.999427		0.977365	0.0086472
171	8.5	2.411	2.253	2.41	2.571	2.505	2.763	2.413	2.179	1.946	1.941	1.739		8.5	0.935947	0.983843	0.992178	0.992664	0.987387	0.994243	0.908851	0.980648	0.989827	0.987786	0.996562		0.977267	0.00849245
172	8.55	2.413	2.227	2.411	2.582	2.499	2.743	2.396	2.19	1.947	1.947	1.745		8.55	0.936724	0.972489	0.99259	0.996911	0.985022	0.987046	0.902448	0.985599	0.990336	0.99084	1		0.976364	0.00903182
173	8.6	2.411	2.237	2.405	2.575	2.514	2.757	2.399	2.176	1.944	1.955	1.734		8.6	0.935947	0.976856	0.990119	0.994208	0.990934	0.992083	0.903578	0.979298	0.98881	0.994911	0.993696		0.976404	0.0088966
174	8.65	2.403	2.24	2.395	2.59	2.497	2.748	2.41	2.179	1.955	1.965	1.733		8.65	0.932842	0.978166	0.986002	1	0.984233	0.988845	0.907721	0.980648	0.994405	1	0.993123		0.976908	0.00887214
175	8.7	2.408	2.236	2.392	2.558	2.49	2.749	2.412	2.181	1.945	1.964	1.731		8.7	0.934783	0.976419	0.984767	0.987645	0.981474	0.989205	0.908475	0.981548	0.989318	0.999491	0.991977		0.975009	0.00835573

## Sheet: Fig.1B
		Iono max	3.846	3.315	3.032	3.842	2.572	3.127	4.807	3.363	3.55	4.182	2.417	3.79	5.298	6.008	2.534	3.904	3.299	2.927	2.542	5.085
	Time	Time	Area1	Area2	Area3	Area4	Area5	Area6	Area7	Area8	Area9	Area10	Area11	Area12	Area13	Area14	Area15	Area16	Area17	Area18	Area19	Area20			Area1	Area2	Area3	Area4	Area5	Area6	Area7	Area8	Area9	Area10	Area11	Area12	Area13	Area14	Area15	Area16	Area17	Area18	Area19	Area20		Ave	S.E.
1	0	0	1.19	1.121	1.182	1.144	1.116	1.139	1.059	1.108	1.192	1.085	1.162	1.201	1.11	1.145	1.128	1.058	1.091	1.177	1.144	1.035		0	0.309412	0.33816	0.389842	0.297762	0.433904	0.364247	0.220304	0.329468	0.335775	0.259445	0.480761	0.316887	0.209513	0.190579	0.445146	0.271004	0.330706	0.402118	0.450039	0.20354		0.328931	0.0194192
2	3	0.05	1.185	1.116	1.186	1.142	1.124	1.115	1.055	1.095	1.182	1.09	1.15	1.199	1.114	1.143	1.103	1.062	1.1	1.165	1.119	1.04		0.05	0.308112	0.336652	0.391161	0.297241	0.437014	0.356572	0.219472	0.325602	0.332958	0.260641	0.475796	0.316359	0.210268	0.190246	0.43528	0.272029	0.333434	0.398018	0.440205	0.204523		0.328005	0.0189641
3	6	0.1	1.211	1.161	1.188	1.165	1.137	1.142	1.084	1.108	1.173	1.114	1.172	1.186	1.133	1.144	1.115	1.075	1.12	1.164	1.13	1.052		0.1	0.314873	0.350226	0.391821	0.303227	0.442068	0.365206	0.225504	0.329468	0.330423	0.26638	0.484899	0.312929	0.213854	0.190413	0.440016	0.275359	0.339497	0.397677	0.444532	0.206883		0.329171	0.0191397
4	9	0.15	1.19	1.111	1.187	1.132	1.129	1.114	1.062	1.112	1.194	1.093	1.156	1.197	1.118	1.131	1.128	1.058	1.114	1.173	1.14	1.04		0.15	0.309412	0.335143	0.391491	0.294638	0.438958	0.356252	0.220928	0.330657	0.336338	0.261358	0.478279	0.315831	0.211023	0.188249	0.445146	0.271004	0.337678	0.400752	0.448466	0.204523		0.330034	0.0193773
5	12	0.2	1.206	1.126	1.191	1.143	1.136	1.109	1.045	1.099	1.185	1.098	1.159	1.174	1.113	1.135	1.112	1.059	1.091	1.166	1.129	1.044		0.2	0.313573	0.339668	0.39281	0.297501	0.44168	0.354653	0.217391	0.326792	0.333803	0.262554	0.47952	0.309763	0.210079	0.188915	0.438832	0.27126	0.330706	0.39836	0.444138	0.20531		0.328336	0.0192766
6	15	0.25	1.223	1.111	1.186	1.156	1.138	1.109	1.055	1.097	1.175	1.092	1.138	1.188	1.109	1.133	1.129	1.051	1.092	1.155	1.117	1.042		0.25	0.317993	0.335143	0.391161	0.300885	0.442457	0.354653	0.219472	0.326197	0.330986	0.261119	0.470832	0.313456	0.209324	0.188582	0.445541	0.269211	0.331009	0.394602	0.439418	0.204916		0.327607	0.0190812
7	18	0.3	1.23	1.155	1.199	1.201	1.159	1.125	1.094	1.116	1.196	1.112	1.169	1.209	1.139	1.156	1.133	1.076	1.116	1.164	1.144	1.069		0.3	0.319813	0.348416	0.395449	0.312598	0.450622	0.35977	0.227585	0.331847	0.336901	0.265901	0.483657	0.318997	0.214987	0.19241	0.447119	0.275615	0.338284	0.397677	0.450039	0.210226		0.330622	0.0192477
8	21	0.35	1.191	1.123	1.176	1.149	1.128	1.145	1.063	1.099	1.185	1.083	1.165	1.207	1.115	1.138	1.12	1.068	1.108	1.184	1.129	1.041		0.35	0.309672	0.338763	0.387863	0.299063	0.438569	0.366166	0.221136	0.326792	0.333803	0.258967	0.482002	0.31847	0.210457	0.189414	0.441989	0.273566	0.335859	0.40451	0.444138	0.20472		0.331596	0.0193398
9	24	0.4	1.189	1.111	1.168	1.136	1.124	1.105	1.053	1.095	1.168	1.083	1.136	1.165	1.1	1.129	1.099	1.042	1.087	1.158	1.112	1.023		0.4	0.309152	0.335143	0.385224	0.295679	0.437014	0.353374	0.219056	0.325602	0.329014	0.258967	0.470004	0.307388	0.207626	0.187916	0.433702	0.266906	0.329494	0.395627	0.437451	0.20118		0.326786	0.0189087
10	27	0.45	1.235	1.147	1.218	1.175	1.158	1.141	1.081	1.122	1.223	1.103	1.184	1.216	1.159	1.185	1.155	1.107	1.134	1.205	1.173	1.086		0.45	0.321113	0.346003	0.401715	0.30583	0.450233	0.364886	0.22488	0.333631	0.344507	0.263749	0.489863	0.320844	0.218762	0.197237	0.455801	0.283555	0.343741	0.411684	0.461448	0.213569		0.330964	0.0197048
11	30	0.5	1.229	1.146	1.192	1.174	1.145	1.146	1.063	1.109	1.226	1.114	1.178	1.223	1.137	1.178	1.146	1.086	1.122	1.195	1.149	1.059		0.5	0.319553	0.345701	0.39314	0.30557	0.445179	0.366485	0.221136	0.329765	0.345352	0.26638	0.487381	0.322691	0.214609	0.196072	0.452249	0.278176	0.340103	0.408268	0.452006	0.20826		0.336278	0.0195225
12	33	0.55	1.243	1.15	1.198	1.183	1.137	1.14	1.079	1.123	1.21	1.117	1.17	1.208	1.143	1.179	1.147	1.089	1.122	1.205	1.143	1.055		0.55	0.323193	0.346908	0.395119	0.307913	0.442068	0.364567	0.224464	0.333928	0.340845	0.267097	0.484071	0.318734	0.215742	0.196238	0.452644	0.278945	0.340103	0.411684	0.449646	0.207473		0.334986	0.0193371
13	36	0.6	1.232	1.17	1.221	1.197	1.183	1.155	1.095	1.15	1.231	1.137	1.195	1.255	1.191	1.173	1.183	1.114	1.149	1.216	1.186	1.085		0.6	0.320333	0.352941	0.402704	0.311556	0.459953	0.369364	0.227793	0.341957	0.346761	0.271879	0.494415	0.331135	0.224802	0.19524	0.466851	0.285348	0.348287	0.415442	0.466562	0.213373		0.338702	0.0200497
14	39	0.65	1.211	1.129	1.189	1.147	1.126	1.109	1.055	1.106	1.17	1.088	1.152	1.182	1.138	1.131	1.101	1.049	1.097	1.16	1.145	1.031		0.65	0.314873	0.340573	0.39215	0.298542	0.437792	0.354653	0.219472	0.328873	0.329577	0.260163	0.476624	0.311873	0.214798	0.188249	0.434491	0.268699	0.332525	0.39631	0.450433	0.202753		0.335003	0.0191513
15	42	0.7	1.228	1.175	1.23	1.198	1.156	1.15	1.097	1.135	1.216	1.126	1.177	1.219	1.18	1.189	1.151	1.097	1.123	1.211	1.177	1.08		0.7	0.319293	0.354449	0.405673	0.311817	0.449456	0.367765	0.228209	0.337496	0.342535	0.269249	0.486967	0.321636	0.222726	0.197903	0.454223	0.280994	0.340406	0.413734	0.463021	0.212389		0.333334	0.0195514
16	45	0.75	1.225	1.18	1.205	1.189	1.136	1.14	1.09	1.131	1.234	1.13	1.169	1.226	1.177	1.19	1.156	1.104	1.142	1.198	1.138	1.07		0.75	0.318513	0.355958	0.397427	0.309474	0.44168	0.364567	0.226753	0.336307	0.347606	0.270206	0.483657	0.323483	0.222159	0.198069	0.456196	0.282787	0.346166	0.409293	0.447679	0.210423		0.338209	0.0190887
17	48	0.8	1.235	1.16	1.204	1.164	1.135	1.14	1.066	1.103	1.194	1.13	1.163	1.2	1.159	1.178	1.138	1.074	1.116	1.186	1.125	1.058		0.8	0.321113	0.349925	0.397098	0.302967	0.441291	0.364567	0.22176	0.327981	0.336338	0.270206	0.481175	0.316623	0.218762	0.196072	0.449092	0.275102	0.338284	0.405193	0.442565	0.208063		0.335314	0.019072
18	51	0.85	1.172	1.135	1.175	1.156	1.123	1.137	1.081	1.106	1.168	1.103	1.137	1.181	1.12	1.153	1.132	1.058	1.116	1.172	1.114	1.04		0.85	0.304732	0.342383	0.387533	0.300885	0.436625	0.363607	0.22488	0.328873	0.329014	0.263749	0.470418	0.311609	0.211401	0.191911	0.446725	0.271004	0.338284	0.40041	0.438238	0.204523		0.330775	0.0188913
19	54	0.9	1.189	1.134	1.171	1.151	1.13	1.106	1.071	1.086	1.178	1.091	1.155	1.201	1.122	1.135	1.102	1.057	1.082	1.153	1.115	1.057		0.9	0.309152	0.342081	0.386214	0.299584	0.439347	0.353694	0.2228	0.322926	0.331831	0.26088	0.477865	0.316887	0.211778	0.188915	0.434886	0.270748	0.327978	0.393919	0.438631	0.207866		0.32762	0.018817
20	57	0.95	1.18	1.138	1.171	1.168	1.128	1.138	1.062	1.088	1.197	1.091	1.161	1.182	1.128	1.142	1.133	1.05	1.103	1.151	1.11	1.048		0.95	0.306812	0.343288	0.386214	0.304008	0.438569	0.363927	0.220928	0.323521	0.337183	0.26088	0.480348	0.311873	0.212911	0.19008	0.447119	0.268955	0.334344	0.393235	0.436664	0.206096		0.327623	0.0190989
21	60	1	1.194	1.128	1.163	1.157	1.134	1.11	1.053	1.102	1.176	1.088	1.148	1.193	1.115	1.138	1.11	1.053	1.1	1.144	1.113	1.039		1	0.310452	0.340271	0.383575	0.301145	0.440902	0.354973	0.219056	0.327684	0.331268	0.260163	0.474969	0.314776	0.210457	0.189414	0.438043	0.269723	0.333434	0.390844	0.437844	0.204326		0.327507	0.0189064
22	63	1.05	1.18	1.137	1.204	1.137	1.136	1.135	1.061	1.115	1.182	1.09	1.159	1.186	1.115	1.13	1.136	1.056	1.094	1.159	1.139	1.033		1.05	0.306812	0.342986	0.397098	0.29594	0.44168	0.362968	0.22072	0.331549	0.332958	0.260641	0.47952	0.312929	0.210457	0.188083	0.448303	0.270492	0.331616	0.395969	0.448072	0.203147		0.327881	0.0195797
23	66	1.1	1.189	1.126	1.173	1.158	1.124	1.111	1.049	1.079	1.182	1.088	1.14	1.184	1.114	1.13	1.132	1.047	1.086	1.159	1.104	1.034		1.1	0.309152	0.339668	0.386873	0.301406	0.437014	0.355293	0.218223	0.320844	0.332958	0.260163	0.471659	0.312401	0.210268	0.188083	0.446725	0.268186	0.329191	0.395969	0.434304	0.203343		0.327591	0.0190154
24	69	1.15	1.168	1.13	1.17	1.153	1.137	1.12	1.052	1.096	1.171	1.08	1.15	1.166	1.11	1.125	1.114	1.047	1.092	1.149	1.112	1.032		1.15	0.303692	0.340875	0.385884	0.300104	0.442068	0.358171	0.218848	0.325899	0.329859	0.25825	0.475796	0.307652	0.209513	0.18725	0.439621	0.268186	0.331009	0.392552	0.437451	0.20295		0.325934	0.0191554
25	72	1.2	1.171	1.12	1.18	1.145	1.133	1.109	1.061	1.077	1.166	1.086	1.148	1.191	1.102	1.155	1.118	1.041	1.1	1.171	1.136	1.041		1.2	0.304472	0.337858	0.389182	0.298022	0.440513	0.354653	0.22072	0.32025	0.328451	0.259684	0.474969	0.314248	0.208003	0.192244	0.4412	0.26665	0.333434	0.400068	0.446892	0.20472		0.326297	0.019237
26	75	1.25	1.19	1.132	1.169	1.152	1.123	1.112	1.048	1.097	1.179	1.08	1.151	1.183	1.117	1.175	1.112	1.049	1.094	1.154	1.123	1.043		1.25	0.309412	0.341478	0.385554	0.299844	0.436625	0.355612	0.218015	0.326197	0.332113	0.25825	0.47621	0.312137	0.210834	0.195573	0.438832	0.268699	0.331616	0.39426	0.441778	0.205113		0.32686	0.0189101
27	78	1.3	1.193	1.146	1.186	1.15	1.134	1.129	1.08	1.103	1.211	1.109	1.158	1.204	1.147	1.187	1.135	1.07	1.102	1.177	1.129	1.053		1.3	0.310192	0.345701	0.391161	0.299323	0.440902	0.361049	0.224672	0.327981	0.341127	0.265184	0.479106	0.317678	0.216497	0.19757	0.447908	0.274078	0.334041	0.402118	0.444138	0.20708		0.329142	0.0189985
28	81	1.35	1.18	1.15	1.191	1.154	1.129	1.12	1.064	1.077	1.175	1.09	1.148	1.195	1.124	1.172	1.124	1.059	1.112	1.136	1.138	1.042		1.35	0.306812	0.346908	0.39281	0.300364	0.438958	0.358171	0.221344	0.32025	0.330986	0.260641	0.474969	0.315303	0.212156	0.195073	0.443567	0.27126	0.337072	0.388111	0.447679	0.204916		0.329871	0.0190267
29	84	1.4	1.161	1.114	1.165	1.135	1.102	1.121	1.065	1.088	1.18	1.089	1.137	1.186	1.119	1.171	1.116	1.042	1.077	1.16	1.124	1.047		1.4	0.301872	0.336048	0.384235	0.295419	0.42846	0.358491	0.221552	0.323521	0.332394	0.260402	0.470418	0.312929	0.211212	0.194907	0.44041	0.266906	0.326463	0.39631	0.442172	0.2059		0.326934	0.0186838
30	87	1.45	1.16	1.139	1.152	1.137	1.116	1.113	1.059	1.095	1.178	1.08	1.147	1.179	1.125	1.171	1.1	1.042	1.071	1.148	1.103	1.064		1.45	0.301612	0.34359	0.379947	0.29594	0.433904	0.355932	0.220304	0.325602	0.331831	0.25825	0.474555	0.311082	0.212344	0.194907	0.434096	0.266906	0.324644	0.39221	0.43391	0.209243		0.325271	0.0185152
31	90	1.5	1.17	1.126	1.179	1.136	1.119	1.122	1.058	1.085	1.162	1.092	1.143	1.197	1.111	1.176	1.137	1.049	1.091	1.153	1.118	1.065		1.5	0.304212	0.339668	0.388852	0.295679	0.43507	0.35881	0.220096	0.322629	0.327324	0.261119	0.4729	0.315831	0.209702	0.195739	0.448698	0.268699	0.330706	0.393919	0.439811	0.20944		0.325993	0.0188912
32	93	1.55	1.177	1.131	1.176	1.157	1.111	1.116	1.072	1.094	1.174	1.082	1.149	1.186	1.123	1.172	1.121	1.031	1.086	1.152	1.119	1.07		1.55	0.306032	0.341176	0.387863	0.301145	0.43196	0.356892	0.223008	0.325305	0.330704	0.258728	0.475383	0.312929	0.211967	0.195073	0.442384	0.264088	0.329191	0.393577	0.440205	0.210423		0.326923	0.0187351
33	96	1.6	1.156	1.127	1.157	1.134	1.117	1.132	1.043	1.085	1.166	1.079	1.136	1.165	1.115	1.161	1.117	1.027	1.085	1.164	1.141	1.061		1.6	0.300572	0.33997	0.381596	0.295159	0.434292	0.362008	0.216975	0.322629	0.328451	0.258011	0.470004	0.307388	0.210457	0.193242	0.440805	0.263064	0.328888	0.397677	0.448859	0.208653		0.326168	0.0190317
34	99	1.65	1.183	1.137	1.199	1.153	1.107	1.121	1.058	1.078	1.185	1.092	1.146	1.177	1.126	1.181	1.134	1.039	1.102	1.155	1.128	1.053		1.65	0.307592	0.342986	0.395449	0.300104	0.430404	0.358491	0.220096	0.320547	0.333803	0.261119	0.474141	0.310554	0.212533	0.196571	0.447514	0.266137	0.334041	0.394602	0.443745	0.20708		0.326655	0.01895
35	102	1.7	1.15	1.141	1.159	1.139	1.111	1.118	1.054	1.102	1.173	1.084	1.146	1.184	1.109	1.179	1.115	1.032	1.09	1.159	1.121	1.052		1.7	0.299012	0.344193	0.382256	0.29646	0.43196	0.357531	0.219264	0.327684	0.330423	0.259206	0.474141	0.312401	0.209324	0.196238	0.440016	0.264344	0.330403	0.395969	0.440991	0.206883		0.326905	0.0188418
36	105	1.75	1.177	1.13	1.184	1.161	1.132	1.116	1.064	1.101	1.189	1.097	1.143	1.178	1.127	1.169	1.113	1.038	1.103	1.148	1.112	1.063		1.75	0.306032	0.340875	0.390501	0.302186	0.440124	0.356892	0.221344	0.327386	0.33493	0.262315	0.4729	0.310818	0.212722	0.194574	0.439227	0.265881	0.334344	0.39221	0.437451	0.209046		0.326761	0.0187272
37	108	1.8	1.125	1.104	1.136	1.11	1.096	1.094	1.035	1.062	1.156	1.062	1.11	1.153	1.085	1.136	1.084	1.003	1.052	1.126	1.078	1.023		1.8	0.292512	0.333032	0.37467	0.288912	0.426128	0.349856	0.215311	0.315789	0.325634	0.253945	0.459247	0.304222	0.204794	0.189081	0.427782	0.256916	0.318885	0.384694	0.424076	0.20118		0.322461	0.018285
38	111	1.85	1.174	1.156	1.169	1.157	1.132	1.127	1.076	1.083	1.19	1.095	1.132	1.188	1.14	1.175	1.126	1.048	1.086	1.143	1.108	1.073		1.85	0.305252	0.348718	0.385554	0.301145	0.440124	0.360409	0.22384	0.322034	0.335211	0.261836	0.468349	0.313456	0.215176	0.195573	0.444357	0.268443	0.329191	0.390502	0.435877	0.211013		0.322568	0.0185252
39	114	1.9	1.208	1.157	1.191	1.141	1.105	1.122	1.049	1.073	1.184	1.092	1.13	1.175	1.122	1.176	1.113	1.033	1.081	1.17	1.107	1.049		1.9	0.314093	0.34902	0.39281	0.296981	0.429627	0.35881	0.218223	0.31906	0.333521	0.261119	0.467522	0.310026	0.211778	0.195739	0.439227	0.2646	0.327675	0.399727	0.435484	0.206293		0.327185	0.0186632
40	117	1.95	1.393	1.059	1.234	1.048	1.038	1.115	0.943	1.102	1.242	1.075	1.077	1.077	1.065	1.103	1.109	1.042	1.035	1.124	1.067	0.942		1.95	0.362194	0.319457	0.406992	0.272775	0.403577	0.356572	0.196172	0.327684	0.349859	0.257054	0.445594	0.284169	0.201019	0.183589	0.437648	0.266906	0.313731	0.384011	0.419748	0.185251		0.322633	0.0191146
41	120	2	1.173	1.114	1.154	1.097	1.083	1.09	1.038	1.029	1.155	1.058	1.112	1.146	1.087	1.131	1.08	1.005	1.053	1.133	1.106	1.027		2	0.304992	0.336048	0.380607	0.285528	0.421073	0.348577	0.215935	0.305977	0.325352	0.252989	0.460074	0.302375	0.205172	0.188249	0.426204	0.257428	0.319188	0.387086	0.43509	0.201967		0.318348	0.0184384
42	123	2.05	1.216	1.176	1.18	1.167	1.133	1.119	1.049	1.099	1.188	1.099	1.142	1.195	1.119	1.149	1.113	1.05	1.073	1.145	1.114	1.048		2.05	0.316173	0.354751	0.389182	0.303748	0.440513	0.357851	0.218223	0.326792	0.334648	0.262793	0.472487	0.315303	0.211212	0.191245	0.439227	0.268955	0.32525	0.391186	0.438238	0.206096		0.323095	0.0188718
43	126	2.1	1.132	1.113	1.14	1.111	1.093	1.097	1.017	1.04	1.158	1.056	1.103	1.141	1.079	1.132	1.084	0.995	1.058	1.122	1.08	1.024		2.1	0.294332	0.335747	0.375989	0.289172	0.424961	0.350815	0.211566	0.309248	0.326197	0.252511	0.456351	0.301055	0.203662	0.188415	0.427782	0.254867	0.320703	0.383328	0.424862	0.201377		0.32242	0.0183488
44	129	2.15	1.168	1.151	1.198	1.153	1.129	1.131	1.071	1.067	1.219	1.106	1.13	1.179	1.119	1.165	1.111	1.036	1.074	1.15	1.135	1.045		2.15	0.303692	0.34721	0.395119	0.300104	0.438958	0.361689	0.2228	0.317276	0.34338	0.264467	0.467522	0.311082	0.211212	0.193908	0.438437	0.265369	0.325553	0.392894	0.446499	0.205506		0.32214	0.018911
45	132	2.2	1.12	1.082	1.153	1.091	1.103	1.106	1.02	1.057	1.181	1.078	1.11	1.139	1.081	1.146	1.104	0.997	1.046	1.122	1.096	1.018		2.2	0.291212	0.326395	0.380277	0.283967	0.428849	0.353694	0.212191	0.314303	0.332676	0.257771	0.459247	0.300528	0.204039	0.190746	0.435675	0.255379	0.317066	0.383328	0.431157	0.200197		0.322784	0.0186797
46	135	2.25	1.177	1.151	1.23	1.139	1.13	1.13	1.053	1.084	1.225	1.127	1.137	1.18	1.119	1.189	1.132	1.033	1.083	1.164	1.108	1.05		2.25	0.306032	0.34721	0.405673	0.29646	0.439347	0.361369	0.219056	0.322331	0.34507	0.269488	0.470418	0.311346	0.211212	0.197903	0.446725	0.2646	0.328281	0.397677	0.435877	0.20649		0.323531	0.0190207
47	138	2.3	1.179	1.164	1.221	1.162	1.149	1.135	1.064	1.076	1.234	1.114	1.159	1.215	1.117	1.181	1.145	1.048	1.093	1.175	1.158	1.043		2.3	0.306552	0.351131	0.402704	0.302447	0.446734	0.362968	0.221344	0.319952	0.347606	0.26638	0.47952	0.32058	0.210834	0.196571	0.451855	0.268443	0.331313	0.401435	0.455547	0.205113		0.33079	0.0196984
48	141	2.35	1.163	1.177	1.217	1.173	1.145	1.128	1.069	1.091	1.245	1.123	1.156	1.197	1.124	1.188	1.129	1.043	1.094	1.193	1.169	1.056		2.35	0.302392	0.355053	0.401385	0.30531	0.445179	0.360729	0.222384	0.324413	0.350704	0.268532	0.478279	0.315831	0.212156	0.197736	0.445541	0.267162	0.331616	0.407585	0.459874	0.20767		0.332714	0.019579
49	144	2.4	1.207	1.183	1.229	1.18	1.152	1.138	1.068	1.08	1.235	1.12	1.153	1.192	1.122	1.178	1.15	1.042	1.075	1.151	1.128	1.059		2.4	0.313833	0.356863	0.405343	0.307132	0.4479	0.363927	0.222176	0.321142	0.347887	0.267814	0.477038	0.314512	0.211778	0.196072	0.453828	0.266906	0.325856	0.393235	0.443745	0.20826		0.332619	0.0193911
50	147	2.45	1.224	1.211	1.228	1.162	1.152	1.142	1.069	1.098	1.221	1.121	1.17	1.214	1.116	1.174	1.129	1.047	1.097	1.169	1.133	1.081		2.45	0.318253	0.365309	0.405013	0.302447	0.4479	0.365206	0.222384	0.326494	0.343944	0.268054	0.484071	0.320317	0.210646	0.195406	0.445541	0.268186	0.332525	0.399385	0.445712	0.212586		0.333116	0.0194382
51	150	2.5	1.206	1.185	1.246	1.178	1.164	1.169	1.077	1.115	1.272	1.148	1.174	1.202	1.135	1.207	1.152	1.065	1.112	1.197	1.164	1.086		2.5	0.313573	0.357466	0.41095	0.306611	0.452566	0.373841	0.224048	0.331549	0.35831	0.27451	0.485726	0.31715	0.214232	0.200899	0.454617	0.272797	0.337072	0.408951	0.457907	0.213569		0.336143	0.0197538
52	153	2.55	1.204	1.227	1.205	1.196	1.14	1.146	1.068	1.092	1.236	1.137	1.15	1.222	1.114	1.191	1.132	1.047	1.09	1.169	1.129	1.091		2.55	0.313053	0.370136	0.397427	0.311296	0.443235	0.366485	0.222176	0.32471	0.348169	0.271879	0.475796	0.322427	0.210268	0.198236	0.446725	0.268186	0.330403	0.399385	0.444138	0.214553		0.336126	0.019031
53	156	2.6	1.234	1.21	1.226	1.159	1.162	1.144	1.085	1.096	1.245	1.143	1.151	1.223	1.126	1.179	1.148	1.053	1.099	1.165	1.148	1.091		2.6	0.320853	0.365008	0.404354	0.301666	0.451788	0.365846	0.225713	0.325899	0.350704	0.273314	0.47621	0.322691	0.212533	0.196238	0.453039	0.269723	0.333131	0.398018	0.451613	0.214553		0.334789	0.0193515
54	159	2.65	1.247	1.254	1.243	1.173	1.153	1.146	1.073	1.096	1.248	1.137	1.164	1.215	1.119	1.19	1.129	1.052	1.094	1.155	1.178	1.118		2.65	0.324233	0.378281	0.40996	0.30531	0.448289	0.366485	0.223216	0.325899	0.351549	0.271879	0.481589	0.32058	0.211212	0.198069	0.445541	0.269467	0.331616	0.394602	0.463415	0.219862		0.336349	0.0195113
55	162	2.7	1.179	1.203	1.202	1.172	1.152	1.151	1.083	1.081	1.242	1.139	1.15	1.217	1.112	1.18	1.125	1.039	1.09	1.18	1.149	1.11		2.7	0.306552	0.362896	0.396438	0.305049	0.4479	0.368084	0.225296	0.321439	0.349859	0.272358	0.475796	0.321108	0.209891	0.196405	0.443962	0.266137	0.330403	0.403143	0.452006	0.218289		0.335352	0.0191872
56	165	2.75	1.278	1.232	1.203	1.172	1.167	1.141	1.057	1.119	1.267	1.135	1.164	1.228	1.106	1.197	1.151	1.05	1.094	1.17	1.143	1.108		2.75	0.332293	0.371644	0.396768	0.305049	0.453733	0.364886	0.219888	0.332739	0.356901	0.271401	0.481589	0.324011	0.208758	0.199234	0.454223	0.268955	0.331616	0.399727	0.449646	0.217896		0.335349	0.019491
57	168	2.8	1.168	1.217	1.209	1.177	1.162	1.159	1.085	1.098	1.265	1.139	1.17	1.223	1.115	1.221	1.141	1.037	1.09	1.173	1.147	1.151		2.8	0.303692	0.367119	0.398747	0.306351	0.451788	0.370643	0.225713	0.326494	0.356338	0.272358	0.484071	0.322691	0.210457	0.203229	0.450276	0.265625	0.330403	0.400752	0.45122	0.226352		0.336632	0.0192749
58	171	2.85	1.11	1.178	1.178	1.173	1.162	1.145	1.086	1.107	1.249	1.131	1.159	1.234	1.111	1.218	1.129	1.016	1.081	1.146	1.138	1.143		2.85	0.288612	0.355354	0.388522	0.30531	0.451788	0.366166	0.225921	0.32917	0.351831	0.270445	0.47952	0.325594	0.209702	0.20273	0.445541	0.260246	0.327675	0.391527	0.447679	0.224779		0.334311	0.0190044
59	174	2.9	1.239	1.239	1.202	1.17	1.201	1.157	1.061	1.128	1.255	1.146	1.165	1.236	1.107	1.213	1.127	1.029	1.091	1.15	1.159	1.133		2.9	0.322153	0.373756	0.396438	0.304529	0.466952	0.370003	0.22072	0.335415	0.353521	0.274032	0.482002	0.326121	0.208947	0.201897	0.444751	0.263576	0.330706	0.392894	0.45594	0.222812		0.334882	0.0195367
60	177	2.95	1.185	1.245	1.204	1.188	1.188	1.15	1.092	1.124	1.256	1.138	1.165	1.228	1.156	1.201	1.142	1.033	1.066	1.173	1.162	1.148		2.95	0.308112	0.375566	0.397098	0.309214	0.461897	0.367765	0.227169	0.334225	0.353803	0.272119	0.482002	0.324011	0.218196	0.1999	0.450671	0.2646	0.323128	0.400752	0.45712	0.225762		0.337507	0.0194079
61	180	3	1.253	1.293	1.193	1.198	1.192	1.156	1.089	1.104	1.234	1.144	1.154	1.246	1.162	1.211	1.125	1.048	1.101	1.161	1.159	1.176		3	0.325793	0.390045	0.39347	0.311817	0.463453	0.369683	0.226545	0.328278	0.347606	0.273553	0.477451	0.32876	0.219328	0.201565	0.443962	0.268443	0.333737	0.396652	0.45594	0.231268		0.338511	0.0189974
62	183	3.05	1.204	1.207	1.191	1.15	1.135	1.127	1.028	1.082	1.214	1.124	1.134	1.189	1.13	1.173	1.115	1.005	1.055	1.123	1.103	1.115		3.05	0.313053	0.364103	0.39281	0.299323	0.441291	0.360409	0.213855	0.321737	0.341972	0.268771	0.469177	0.31372	0.213288	0.19524	0.440016	0.257428	0.319794	0.383669	0.43391	0.219272		0.333755	0.0186278
63	186	3.1	1.116	1.217	1.178	1.207	1.19	1.162	1.103	1.119	1.259	1.159	1.18	1.235	1.171	1.209	1.121	1.052	1.082	1.158	1.156	1.175		3.1	0.290172	0.367119	0.388522	0.314159	0.462675	0.371602	0.229457	0.332739	0.354648	0.27714	0.488209	0.325858	0.221027	0.201232	0.442384	0.269467	0.327978	0.395627	0.45476	0.231072		0.332717	0.019049
64	189	3.15	1.149	1.171	1.223	1.232	1.214	1.189	1.134	1.154	1.282	1.183	1.203	1.266	1.209	1.267	1.142	1.061	1.112	1.18	1.174	1.185		3.15	0.298752	0.353243	0.403364	0.320666	0.472006	0.380237	0.235906	0.343146	0.361127	0.282879	0.497724	0.334037	0.228199	0.210885	0.450671	0.271773	0.337072	0.403143	0.461841	0.233038		0.340639	0.01925
65	192	3.2	1.264	1.223	1.218	1.234	1.222	1.203	1.108	1.172	1.288	1.162	1.193	1.261	1.208	1.268	1.17	1.05	1.099	1.18	1.168	1.178		3.2	0.328653	0.368929	0.401715	0.321187	0.475117	0.384714	0.230497	0.348498	0.362817	0.277857	0.493587	0.332718	0.228011	0.211052	0.461721	0.268955	0.333131	0.403143	0.459481	0.231662		0.345079	0.0194523
66	195	3.25	1.239	1.291	1.247	1.228	1.208	1.187	1.121	1.141	1.312	1.188	1.198	1.263	1.195	1.257	1.145	1.059	1.108	1.199	1.188	1.206		3.25	0.322153	0.389442	0.41128	0.319625	0.469673	0.379597	0.233202	0.33928	0.369577	0.284075	0.495656	0.333245	0.225557	0.209221	0.451855	0.27126	0.335859	0.409634	0.467349	0.237168		0.346954	0.0194817
67	198	3.3	1.226	1.221	1.182	1.187	1.182	1.149	1.067	1.101	1.259	1.141	1.148	1.226	1.14	1.235	1.117	1.022	1.085	1.146	1.133	1.144		3.3	0.318773	0.368326	0.389842	0.308954	0.459565	0.367445	0.221968	0.327386	0.354648	0.272836	0.474969	0.323483	0.215176	0.205559	0.440805	0.261783	0.328888	0.391527	0.445712	0.224975		0.341433	0.0187575
68	201	3.35	1.195	1.187	1.22	1.195	1.171	1.137	1.08	1.117	1.29	1.136	1.157	1.229	1.134	1.228	1.136	1.019	1.068	1.149	1.152	1.148		3.35	0.310712	0.358069	0.402375	0.311036	0.455288	0.363607	0.224672	0.332144	0.36338	0.27164	0.478693	0.324274	0.214043	0.204394	0.448303	0.261014	0.323734	0.392552	0.453186	0.225762		0.335537	0.0190987
69	204	3.4	1.171	1.227	1.195	1.214	1.175	1.149	1.094	1.123	1.336	1.143	1.15	1.231	1.116	1.218	1.113	1.016	1.082	1.145	1.134	1.161		3.4	0.304472	0.370136	0.394129	0.315981	0.456843	0.367445	0.227585	0.333928	0.376338	0.273314	0.475796	0.324802	0.210646	0.20273	0.439227	0.260246	0.327978	0.391186	0.446105	0.228319		0.336152	0.018863
70	207	3.45	1.199	1.157	1.221	1.182	1.149	1.136	1.051	1.092	1.369	1.12	1.133	1.207	1.119	1.197	1.116	1.012	1.084	1.145	1.127	1.1		3.45	0.311752	0.34902	0.402704	0.307652	0.446734	0.363287	0.218639	0.32471	0.385634	0.267814	0.468763	0.31847	0.211212	0.199234	0.44041	0.259221	0.328584	0.391186	0.443352	0.216323		0.334548	0.019041
71	210	3.5	1.25	1.227	1.259	1.205	1.186	1.167	1.103	1.137	1.401	1.164	1.167	1.24	1.122	1.225	1.14	1.043	1.111	1.187	1.149	1.151		3.5	0.325013	0.370136	0.415237	0.313639	0.46112	0.373201	0.229457	0.338091	0.394648	0.278336	0.48283	0.327177	0.211778	0.203895	0.449882	0.267162	0.336769	0.405535	0.452006	0.226352		0.337924	0.0195176
72	213	3.55	1.225	1.207	1.27	1.208	1.17	1.174	1.103	1.114	1.393	1.174	1.187	1.248	1.133	1.208	1.163	1.052	1.089	1.157	1.163	1.134		3.55	0.318513	0.364103	0.418865	0.31442	0.454899	0.37544	0.229457	0.331252	0.392394	0.280727	0.491105	0.329288	0.213854	0.201065	0.458958	0.269467	0.3301	0.395285	0.457514	0.223009		0.342799	0.0197847
73	216	3.6	1.21	1.19	1.251	1.209	1.173	1.146	1.076	1.099	1.371	1.141	1.143	1.233	1.112	1.196	1.14	1.022	1.086	1.162	1.108	1.13		3.6	0.314613	0.358974	0.412599	0.31468	0.456065	0.366485	0.22384	0.326792	0.386197	0.272836	0.4729	0.32533	0.209891	0.199068	0.449882	0.261783	0.329191	0.396994	0.435877	0.222222		0.339648	0.0192277
74	219	3.65	1.236	1.217	1.281	1.199	1.159	1.163	1.099	1.13	1.417	1.175	1.166	1.253	1.137	1.23	1.164	1.047	1.092	1.164	1.164	1.15		3.65	0.321373	0.367119	0.422493	0.312077	0.450622	0.371922	0.228625	0.33601	0.399155	0.280966	0.482416	0.330607	0.214609	0.204727	0.459353	0.268186	0.331009	0.397677	0.457907	0.226155		0.339981	0.0195471
75	222	3.7	1.275	1.24	1.295	1.234	1.16	1.171	1.123	1.123	1.427	1.187	1.2	1.271	1.144	1.25	1.153	1.066	1.11	1.175	1.149	1.178		3.7	0.331513	0.374057	0.427111	0.321187	0.451011	0.37448	0.233618	0.333928	0.401972	0.283835	0.496483	0.335356	0.215931	0.208056	0.455012	0.273053	0.336466	0.401435	0.452006	0.231662		0.34503	0.0194104
76	225	3.75	1.275	1.246	1.29	1.233	1.156	1.182	1.106	1.115	1.45	1.181	1.195	1.259	1.153	1.236	1.155	1.078	1.103	1.195	1.176	1.17		3.75	0.331513	0.375867	0.425462	0.320927	0.449456	0.377998	0.230081	0.331549	0.408451	0.282401	0.494415	0.33219	0.217629	0.205726	0.455801	0.276127	0.334344	0.408268	0.462628	0.230088		0.347227	0.0197136
77	228	3.8	1.267	1.227	1.269	1.202	1.138	1.172	1.099	1.103	1.398	1.17	1.177	1.253	1.119	1.213	1.146	1.041	1.084	1.17	1.165	1.151		3.8	0.329433	0.370136	0.418536	0.312858	0.442457	0.3748	0.228625	0.327981	0.393803	0.27977	0.486967	0.330607	0.211212	0.201897	0.452249	0.26665	0.328584	0.399727	0.458301	0.226352		0.344797	0.0195041
78	231	3.85	1.281	1.246	1.262	1.206	1.167	1.156	1.11	1.115	1.388	1.161	1.159	1.242	1.109	1.214	1.133	1.051	1.1	1.16	1.142	1.138		3.85	0.333073	0.375867	0.416227	0.313899	0.453733	0.369683	0.230913	0.331549	0.390986	0.277618	0.47952	0.327704	0.209324	0.202064	0.447119	0.269211	0.333434	0.39631	0.449253	0.223795		0.341806	0.0192569
79	234	3.9	1.25	1.28	1.244	1.232	1.182	1.155	1.095	1.114	1.382	1.176	1.174	1.22	1.104	1.194	1.127	1.027	1.088	1.158	1.165	1.141		3.9	0.325013	0.386124	0.41029	0.320666	0.459565	0.369364	0.227793	0.331252	0.389296	0.281205	0.485726	0.3219	0.208381	0.198735	0.444751	0.263064	0.329797	0.395627	0.458301	0.224385		0.341563	0.0197101
80	237	3.95	1.303	1.283	1.286	1.257	1.196	1.19	1.121	1.124	1.424	1.197	1.18	1.27	1.131	1.219	1.16	1.066	1.116	1.174	1.204	1.171		3.95	0.338794	0.387029	0.424142	0.327173	0.465008	0.380556	0.233202	0.334225	0.401127	0.286227	0.488209	0.335092	0.213477	0.202896	0.457774	0.273053	0.338284	0.401093	0.473643	0.230285		0.345563	0.0199834
81	240	4	1.294	1.242	1.278	1.228	1.16	1.155	1.107	1.125	1.434	1.181	1.169	1.226	1.125	1.218	1.16	1.061	1.086	1.184	1.156	1.152		4	0.336453	0.374661	0.421504	0.319625	0.451011	0.369364	0.230289	0.334523	0.403944	0.282401	0.483657	0.323483	0.212344	0.20273	0.457774	0.271773	0.329191	0.40451	0.45476	0.226549		0.347046	0.019562
82	243	4.05	1.284	1.265	1.26	1.214	1.157	1.169	1.102	1.142	1.397	1.168	1.167	1.231	1.102	1.189	1.137	1.047	1.09	1.188	1.161	1.14		4.05	0.333853	0.381599	0.415567	0.315981	0.449844	0.373841	0.229249	0.339578	0.393521	0.279292	0.48283	0.324802	0.208003	0.197903	0.448698	0.268186	0.330403	0.405876	0.456727	0.224189		0.343762	0.0196409
83	246	4.1	1.292	1.237	1.298	1.191	1.171	1.174	1.091	1.104	1.4	1.157	1.168	1.231	1.114	1.211	1.16	1.04	1.089	1.157	1.167	1.121		4.1	0.335933	0.373152	0.4281	0.309995	0.455288	0.37544	0.226961	0.328278	0.394366	0.276662	0.483244	0.324802	0.210268	0.201565	0.457774	0.266393	0.3301	0.395285	0.459087	0.220452		0.342827	0.0199821
84	249	4.15	1.305	1.246	1.262	1.225	1.147	1.152	1.092	1.102	1.405	1.168	1.155	1.239	1.11	1.199	1.136	1.028	1.08	1.174	1.155	1.127		4.15	0.339314	0.375867	0.416227	0.318844	0.445956	0.368404	0.227169	0.327684	0.395775	0.279292	0.477865	0.326913	0.209513	0.199567	0.448303	0.26332	0.327372	0.401093	0.454367	0.221632		0.341941	0.0194494
85	252	4.2	1.314	1.254	1.276	1.22	1.153	1.158	1.101	1.113	1.41	1.164	1.162	1.242	1.105	1.222	1.146	1.039	1.09	1.172	1.159	1.148		4.2	0.341654	0.378281	0.420844	0.317543	0.448289	0.370323	0.229041	0.330955	0.397183	0.278336	0.480761	0.327704	0.208569	0.203395	0.452249	0.266137	0.330403	0.40041	0.45594	0.225762		0.342206	0.0195075
86	255	4.25	1.318	1.266	1.285	1.211	1.162	1.155	1.107	1.134	1.41	1.184	1.176	1.232	1.11	1.212	1.157	1.049	1.085	1.15	1.173	1.135		4.25	0.342694	0.3819	0.423813	0.3152	0.451788	0.369364	0.230289	0.337199	0.397183	0.283118	0.486554	0.325066	0.209513	0.201731	0.45659	0.268699	0.328888	0.392894	0.461448	0.223206		0.343773	0.0197861
87	258	4.3	1.317	1.26	1.291	1.217	1.168	1.18	1.105	1.12	1.439	1.171	1.187	1.259	1.121	1.219	1.18	1.066	1.106	1.187	1.193	1.152		4.3	0.342434	0.38009	0.425792	0.316762	0.454121	0.377358	0.229873	0.333036	0.405352	0.28001	0.491105	0.33219	0.211589	0.202896	0.465667	0.273053	0.335253	0.405535	0.469315	0.226549		0.346128	0.0202027
88	261	4.35	1.321	1.27	1.287	1.218	1.147	1.176	1.116	1.122	1.405	1.154	1.165	1.232	1.114	1.185	1.151	1.043	1.093	1.158	1.16	1.133		4.35	0.343474	0.383107	0.424472	0.317022	0.445956	0.376079	0.232161	0.333631	0.395775	0.275945	0.482002	0.325066	0.210268	0.197237	0.454223	0.267162	0.331313	0.395627	0.456334	0.222812		0.345691	0.0196744
89	264	4.4	1.338	1.284	1.328	1.258	1.168	1.18	1.132	1.14	1.425	1.204	1.206	1.272	1.131	1.214	1.162	1.076	1.117	1.187	1.207	1.166		4.4	0.347894	0.38733	0.437995	0.327434	0.454121	0.377358	0.23549	0.338983	0.401408	0.287901	0.498966	0.33562	0.213477	0.202064	0.458564	0.275615	0.338587	0.405535	0.474823	0.229302		0.347453	0.0201662
90	267	4.45	1.343	1.259	1.293	1.218	1.144	1.168	1.105	1.133	1.408	1.172	1.176	1.256	1.104	1.185	1.146	1.05	1.089	1.163	1.18	1.12		4.45	0.349194	0.379789	0.426451	0.317022	0.44479	0.373521	0.229873	0.336902	0.39662	0.280249	0.486554	0.331398	0.208381	0.197237	0.452249	0.268955	0.3301	0.397335	0.464201	0.220256		0.347989	0.0198896
91	270	4.5	1.317	1.29	1.292	1.232	1.137	1.178	1.129	1.114	1.381	1.169	1.192	1.233	1.109	1.181	1.126	1.044	1.095	1.166	1.164	1.131		4.5	0.342434	0.38914	0.426121	0.320666	0.442068	0.376719	0.234866	0.331252	0.389014	0.279531	0.493173	0.32533	0.209324	0.196571	0.444357	0.267418	0.331919	0.39836	0.457907	0.222419		0.344242	0.0197044
92	273	4.55	1.319	1.276	1.295	1.209	1.154	1.161	1.114	1.117	1.395	1.18	1.179	1.23	1.123	1.189	1.143	1.045	1.094	1.171	1.16	1.126		4.55	0.342954	0.384917	0.427111	0.31468	0.448678	0.371282	0.231745	0.332144	0.392958	0.282162	0.487795	0.324538	0.211967	0.197903	0.451066	0.267674	0.331616	0.400068	0.456334	0.221436		0.34394	0.0197462
93	276	4.6	1.339	1.248	1.293	1.208	1.149	1.17	1.097	1.126	1.388	1.164	1.165	1.243	1.121	1.179	1.14	1.043	1.092	1.17	1.132	1.113		4.6	0.348154	0.376471	0.426451	0.31442	0.446734	0.374161	0.228209	0.33482	0.390986	0.278336	0.482002	0.327968	0.211589	0.196238	0.449882	0.267162	0.331009	0.399727	0.445319	0.218879		0.343189	0.019544
94	279	4.65	1.314	1.297	1.284	1.215	1.143	1.17	1.105	1.097	1.402	1.162	1.158	1.235	1.125	1.177	1.121	1.036	1.076	1.168	1.118	1.128		4.65	0.341654	0.391252	0.423483	0.316242	0.444401	0.374161	0.229873	0.326197	0.39493	0.277857	0.479106	0.325858	0.212344	0.195905	0.442384	0.265369	0.326159	0.399043	0.439811	0.221829		0.341909	0.0193074
95	282	4.7	1.329	1.267	1.289	1.207	1.149	1.17	1.098	1.126	1.393	1.168	1.185	1.245	1.119	1.192	1.152	1.047	1.085	1.155	1.149	1.128		4.7	0.345554	0.382202	0.425132	0.314159	0.446734	0.374161	0.228417	0.33482	0.392394	0.279292	0.490277	0.328496	0.211212	0.198402	0.454617	0.268186	0.328888	0.394602	0.452006	0.221829		0.342481	0.0197485
96	285	4.75	1.338	1.29	1.317	1.231	1.159	1.187	1.117	1.134	1.423	1.182	1.176	1.253	1.133	1.218	1.151	1.077	1.101	1.19	1.191	1.136		4.75	0.347894	0.38914	0.434367	0.320406	0.450622	0.379597	0.232369	0.337199	0.400845	0.28264	0.486554	0.330607	0.213854	0.20273	0.454223	0.275871	0.333737	0.40656	0.468529	0.223402		0.346063	0.019918
97	288	4.8	1.351	1.311	1.322	1.243	1.182	1.183	1.136	1.151	1.454	1.194	1.207	1.267	1.141	1.215	1.161	1.083	1.121	1.194	1.206	1.154		4.8	0.351274	0.395475	0.436016	0.323529	0.459565	0.378318	0.236322	0.342254	0.409577	0.285509	0.499379	0.334301	0.215364	0.20223	0.458169	0.277408	0.3398	0.407926	0.47443	0.226942		0.350623	0.0203328
98	291	4.85	1.309	1.264	1.297	1.226	1.162	1.165	1.092	1.115	1.407	1.172	1.162	1.215	1.102	1.191	1.143	1.047	1.101	1.19	1.143	1.134		4.85	0.340354	0.381297	0.42777	0.319105	0.451788	0.372562	0.227169	0.331549	0.396338	0.280249	0.480761	0.32058	0.208003	0.198236	0.451066	0.268186	0.333737	0.40656	0.449646	0.223009		0.348044	0.0197418
99	294	4.9	1.311	1.288	1.296	1.219	1.145	1.197	1.124	1.11	1.382	1.16	1.181	1.242	1.104	1.187	1.134	1.046	1.078	1.184	1.152	1.148		4.9	0.340874	0.388537	0.427441	0.317283	0.445179	0.382795	0.233826	0.330062	0.389296	0.277379	0.488622	0.327704	0.208381	0.19757	0.447514	0.26793	0.326766	0.40451	0.453186	0.225762		0.343715	0.0197092
100	297	4.95	1.346	1.267	1.271	1.193	1.124	1.134	1.095	1.071	1.368	1.142	1.141	1.22	1.078	1.167	1.126	1.026	1.056	1.153	1.098	1.084		4.95	0.349974	0.382202	0.419195	0.310515	0.437014	0.362648	0.227793	0.318466	0.385352	0.273075	0.472073	0.3219	0.203473	0.194241	0.444357	0.262807	0.320097	0.393919	0.431943	0.213176		0.340121	0.0192351
101	300	5	1.189	1.231	1.461	1.432	1.334	1.513	1.376	1.461	1.781	2.181	1.625	1.497	2.156	1.826	1.863	2.174	1.659	1.703	1.486	2.024		5	0.309152	0.371342	0.48186	0.372723	0.518663	0.48385	0.286249	0.434434	0.50169	0.521521	0.672321	0.394987	0.406946	0.303928	0.735201	0.556865	0.50288	0.581824	0.584579	0.398033		0.403582	0.0268684
102	303	5.05	1.572	1.623	2.277	2.481	1.989	2.586	2.772	2.656	2.909	3.08	2.162	2.534	4.418	3.992	2.19	3.386	2.83	2.49	2.22	3.507		5.05	0.408736	0.489593	0.750989	0.645757	0.773328	0.826991	0.576659	0.789771	0.819437	0.73649	0.894497	0.668602	0.8339	0.664447	0.864246	0.867316	0.857836	0.8507	0.873328	0.689676		0.607534	0.0302119
103	306	5.1	1.468	1.738	2.263	2.629	2.014	2.558	3.014	2.596	2.873	3.107	2.139	2.692	4.26	4.121	1.989	2.82	2.887	2.585	2.227	3.35		5.1	0.381695	0.524284	0.746372	0.684279	0.783048	0.818036	0.627002	0.77193	0.809296	0.742946	0.884981	0.71029	0.804077	0.685919	0.784925	0.722336	0.875114	0.883157	0.876082	0.6588		0.741422	0.0280833
104	309	5.15	1.429	1.602	2.161	2.626	2.012	2.477	2.983	2.594	2.65	3.048	2.106	2.678	3.875	4.052	1.913	2.5	2.814	2.506	2.195	3.229		5.15	0.371555	0.483258	0.712731	0.683498	0.782271	0.792133	0.620553	0.771335	0.746479	0.728838	0.871328	0.706596	0.731408	0.674434	0.754933	0.640369	0.852986	0.856167	0.863493	0.635005		0.726348	0.0279752
105	312	5.2	1.393	1.515	2.093	2.686	2.011	2.509	3.09	2.619	2.6	3.122	2.135	2.725	3.732	4.027	1.877	2.281	2.826	2.55	2.169	3.265		5.2	0.362194	0.457014	0.690303	0.699115	0.781882	0.802366	0.642813	0.778769	0.732394	0.746533	0.883326	0.718997	0.704417	0.670273	0.740726	0.584273	0.856623	0.871199	0.853265	0.642085		0.712448	0.0295289
106	315	5.25	1.396	1.47	1.916	2.562	1.968	2.456	2.965	2.569	2.365	2.99	2.071	2.633	3.477	3.84	1.801	2.062	2.724	2.422	2.053	3.157		5.25	0.362975	0.443439	0.631926	0.66684	0.765163	0.785417	0.616809	0.763901	0.666197	0.714969	0.856847	0.694723	0.656285	0.639148	0.710734	0.528176	0.825705	0.827468	0.807632	0.620846		0.695094	0.0285729
107	318	5.3	1.387	1.488	1.911	2.617	2.079	2.485	3.072	2.688	2.367	3.065	2.11	2.742	3.378	3.928	1.85	1.989	2.78	2.5	2.173	3.193		5.3	0.360634	0.448869	0.630277	0.681156	0.80832	0.794691	0.639068	0.799286	0.666761	0.732903	0.872983	0.723483	0.637599	0.653795	0.730071	0.509477	0.84268	0.854117	0.854839	0.627925		0.686353	0.0310363
108	321	5.35	1.408	1.527	1.913	2.63	2.084	2.502	3.061	2.659	2.363	3.12	2.115	2.798	3.312	3.985	1.813	1.982	2.794	2.504	2.056	3.242		5.35	0.366095	0.460633	0.630937	0.684539	0.810264	0.800128	0.63678	0.790663	0.665634	0.746055	0.875052	0.738259	0.625142	0.663282	0.71547	0.507684	0.846923	0.855483	0.808812	0.637561		0.693358	0.0302784
109	324	5.4	1.427	1.488	1.879	2.665	2.106	2.521	2.998	2.702	2.368	3.023	2.087	2.778	3.178	3.948	1.853	1.903	2.82	2.514	2.125	3.181		5.4	0.371035	0.448869	0.619723	0.693649	0.818818	0.806204	0.623674	0.803449	0.667042	0.72286	0.863467	0.732982	0.599849	0.657124	0.731255	0.487449	0.854804	0.8589	0.835956	0.625565		0.692202	0.0315729
110	327	5.45	1.379	1.492	1.83	2.603	2.088	2.47	3.04	2.582	2.275	2.996	2.063	2.762	3.134	3.841	1.81	1.854	2.743	2.481	2.087	3.185		5.45	0.358554	0.450075	0.603562	0.677512	0.81182	0.789894	0.632411	0.767767	0.640845	0.716404	0.853537	0.72876	0.591544	0.639314	0.714286	0.474898	0.831464	0.847626	0.821007	0.626352		0.685008	0.0309206
111	330	5.5	1.386	1.511	1.791	2.659	2.097	2.46	3.005	2.655	2.28	3.07	2.059	2.826	3.041	3.848	1.781	1.806	2.765	2.471	2.102	3.144		5.5	0.360374	0.455807	0.590699	0.692087	0.815319	0.786697	0.62513	0.789474	0.642254	0.734099	0.851882	0.745646	0.57399	0.640479	0.702841	0.462602	0.838133	0.844209	0.826908	0.618289		0.679364	0.0316802
112	333	5.55	1.438	1.534	1.866	2.7	2.151	2.52	3.131	2.695	2.313	3.11	2.082	2.858	3.002	3.823	1.784	1.871	2.812	2.542	2.134	3.197		5.55	0.373895	0.462745	0.615435	0.702759	0.836314	0.805884	0.651342	0.801368	0.651549	0.743663	0.861398	0.75409	0.566629	0.636318	0.704025	0.479252	0.85238	0.868466	0.839496	0.628712		0.685816	0.0320706
113	336	5.6	1.391	1.457	1.8	2.604	2.057	2.43	2.978	2.646	2.245	3.048	2.037	2.744	2.946	3.777	1.793	1.799	2.727	2.431	2.102	3.014		5.6	0.361674	0.439517	0.593668	0.677772	0.799767	0.777103	0.619513	0.786798	0.632394	0.728838	0.84278	0.724011	0.556059	0.628662	0.707577	0.460809	0.826614	0.830543	0.826908	0.592724		0.681236	0.0314964
114	339	5.65	1.431	1.47	1.758	2.576	2.107	2.487	2.943	2.579	2.216	2.973	2.02	2.748	2.929	3.758	1.738	1.775	2.706	2.47	2.091	3.041		5.65	0.372075	0.443439	0.579815	0.670484	0.819207	0.795331	0.612232	0.766875	0.624225	0.710904	0.835747	0.725066	0.55285	0.625499	0.685872	0.454662	0.820249	0.843867	0.822581	0.598033		0.669319	0.031485
115	342	5.7	1.391	1.455	1.785	2.538	2.071	2.39	2.922	2.586	2.211	2.973	2.011	2.723	2.841	3.736	1.731	1.715	2.681	2.409	2.02	2.984		5.7	0.361674	0.438914	0.58872	0.660593	0.80521	0.764311	0.607864	0.768956	0.622817	0.710904	0.832023	0.71847	0.53624	0.621838	0.68311	0.439293	0.812671	0.823027	0.79465	0.586824		0.663428	0.0310291
116	345	5.75	1.353	1.419	1.687	2.444	2.017	2.383	2.866	2.577	2.101	2.892	1.984	2.622	2.764	3.58	1.764	1.708	2.592	2.38	2.017	2.894		5.75	0.351794	0.428054	0.556398	0.636127	0.784215	0.762072	0.596214	0.76628	0.591831	0.691535	0.820852	0.691821	0.521706	0.595872	0.696133	0.4375	0.785693	0.813119	0.79347	0.569125		0.651698	0.0311358
117	348	5.8	1.437	1.479	1.738	2.569	2.123	2.443	2.984	2.621	2.176	2.987	2.044	2.722	2.795	3.662	1.783	1.778	2.691	2.462	2.106	2.949		5.8	0.373635	0.446154	0.573219	0.668662	0.825428	0.78126	0.620761	0.779364	0.612958	0.714252	0.845676	0.718206	0.527558	0.609521	0.703631	0.45543	0.815702	0.841134	0.828482	0.579941		0.65527	0.0320845
118	351	5.85	1.44	1.494	1.829	2.591	2.118	2.456	3.049	2.678	2.186	3.029	2.06	2.78	2.809	3.757	1.784	1.766	2.745	2.484	2.108	3.09		5.85	0.374415	0.450679	0.603232	0.674388	0.823484	0.785417	0.634283	0.796313	0.615775	0.724295	0.852296	0.733509	0.5302	0.625333	0.704025	0.452357	0.83207	0.84865	0.829268	0.60767		0.670466	0.0322096
119	354	5.9	1.42	1.468	1.717	2.478	2.088	2.377	2.906	2.584	2.128	2.959	2.011	2.694	2.705	3.685	1.733	1.702	2.6	2.452	2.082	2.932		5.9	0.369215	0.442836	0.566293	0.644977	0.81182	0.760154	0.604535	0.768362	0.599437	0.707556	0.832023	0.710818	0.51057	0.613349	0.683899	0.435963	0.788118	0.837718	0.81904	0.576598		0.664523	0.0316877
120	357	5.95	1.42	1.507	1.786	2.466	2.048	2.459	2.921	2.594	2.159	2.967	2.038	2.718	2.739	3.691	1.814	1.768	2.653	2.404	2.144	2.962		5.95	0.369215	0.4546	0.58905	0.641853	0.796267	0.786377	0.607656	0.771335	0.608169	0.709469	0.843194	0.71715	0.516988	0.614348	0.715864	0.452869	0.804183	0.821319	0.84343	0.582498		0.658228	0.0315672
121	360	6	1.412	1.415	1.686	2.382	2.033	2.342	2.849	2.533	2.081	2.845	1.95	2.615	2.64	3.537	1.71	1.69	2.541	2.322	1.967	2.883		6	0.367135	0.426848	0.556069	0.61999	0.790435	0.748961	0.592677	0.753197	0.586197	0.680297	0.806785	0.689974	0.498301	0.588715	0.674822	0.432889	0.770233	0.793304	0.7738	0.566962		0.649086	0.0299956
122	363	6.05	1.425	1.476	1.705	2.467	2.1	2.378	2.943	2.576	2.088	2.952	1.986	2.71	2.639	3.573	1.78	1.701	2.576	2.442	2.042	3.009		6.05	0.370515	0.445249	0.562335	0.642113	0.816485	0.760473	0.612232	0.765983	0.588169	0.705882	0.82168	0.71504	0.498112	0.594707	0.702447	0.435707	0.780843	0.834301	0.803304	0.59174		0.644123	0.0314518
123	366	6.1	1.562	1.427	1.636	2.349	1.955	2.292	2.729	2.451	1.95	2.818	1.922	2.522	2.665	3.422	1.738	1.738	2.472	2.315	1.907	2.929		6.1	0.406136	0.430468	0.539578	0.6114	0.760109	0.732971	0.567714	0.728814	0.549296	0.67384	0.795201	0.665435	0.50302	0.569574	0.685872	0.445184	0.749318	0.790912	0.750197	0.576008		0.639459	0.0276689
124	369	6.15	1.432	1.499	1.626	2.425	1.982	2.359	2.879	2.528	1.971	2.893	1.948	2.691	2.586	3.516	1.72	1.653	2.528	2.366	2.007	3.114		6.15	0.372335	0.452187	0.53628	0.631182	0.770607	0.754397	0.598918	0.75171	0.555211	0.691774	0.805958	0.710026	0.488109	0.58522	0.678769	0.423412	0.766293	0.808336	0.789536	0.612389		0.632842	0.0301863
125	372	6.2	1.462	1.439	1.661	2.342	2.011	2.358	2.871	2.494	1.984	2.821	1.917	2.618	2.514	3.546	1.728	1.617	2.441	2.354	1.958	2.944		6.2	0.380135	0.434087	0.547823	0.609578	0.781882	0.754077	0.597254	0.7416	0.558873	0.674558	0.793132	0.690765	0.474519	0.590213	0.681926	0.414191	0.739921	0.804236	0.77026	0.578958		0.635016	0.0297823
126	375	6.25	1.428	1.448	1.663	2.317	1.989	2.29	2.82	2.476	1.966	2.803	1.899	2.597	2.529	3.448	1.694	1.615	2.471	2.309	2.006	2.87		6.25	0.371295	0.436802	0.548483	0.603071	0.773328	0.732331	0.586644	0.736247	0.553803	0.670253	0.785685	0.685224	0.47735	0.573901	0.668508	0.413678	0.749015	0.788862	0.789142	0.564405		0.62815	0.0296406
127	378	6.3	1.459	1.401	1.627	2.253	1.944	2.287	2.768	2.416	1.945	2.765	1.906	2.535	2.478	3.379	1.727	1.646	2.412	2.303	1.935	2.813		6.3	0.379355	0.422624	0.536609	0.586413	0.755832	0.731372	0.575827	0.718406	0.547887	0.661167	0.788581	0.668865	0.467724	0.562417	0.681531	0.421619	0.731131	0.786812	0.761212	0.553196		0.621165	0.0289817
128	381	6.35	1.374	1.334	1.539	2.159	1.863	2.119	2.668	2.262	1.876	2.573	1.78	2.359	2.378	3.124	1.634	1.604	2.245	2.137	1.855	2.637		6.35	0.357254	0.402413	0.507586	0.561947	0.724339	0.677646	0.555024	0.672614	0.528451	0.615256	0.73645	0.622427	0.448849	0.519973	0.64483	0.410861	0.680509	0.730099	0.72974	0.518584		0.599586	0.0265969
129	384	6.4	1.399	1.39	1.566	2.169	1.832	2.114	2.694	2.232	1.887	2.597	1.795	2.306	2.3	3.04	1.677	1.633	2.215	2.089	1.852	2.515		6.4	0.363755	0.419306	0.516491	0.56455	0.712286	0.676047	0.560433	0.663693	0.531549	0.620995	0.742656	0.608443	0.434126	0.505992	0.6618	0.418289	0.671416	0.7137	0.72856	0.494592		0.581338	0.0260291
130	387	6.45	1.367	1.341	1.515	2.012	1.733	2.003	2.44	1.983	1.788	2.435	1.676	2.099	2.198	2.741	1.677	1.613	2.058	1.925	1.74	2.31		6.45	0.355434	0.404525	0.49967	0.523686	0.673795	0.64055	0.507593	0.589652	0.503662	0.582257	0.693422	0.553826	0.414874	0.456225	0.6618	0.413166	0.623825	0.65767	0.6845	0.454277		0.562577	0.0237822
131	390	6.5	1.429	1.35	1.497	1.906	1.637	1.94	2.254	1.857	1.742	2.252	1.599	1.925	2.1	2.516	1.585	1.588	1.889	1.839	1.676	2.147		6.5	0.371555	0.40724	0.493734	0.496096	0.63647	0.620403	0.4689	0.552186	0.490704	0.538498	0.661564	0.507916	0.396376	0.418775	0.625493	0.406762	0.572598	0.628288	0.659323	0.422222		0.531738	0.0216191
132	393	6.55	1.372	1.359	1.467	1.831	1.577	1.808	2.101	1.757	1.636	2.101	1.549	1.874	1.985	2.319	1.544	1.539	1.779	1.736	1.616	2.028		6.55	0.356734	0.409955	0.483839	0.476575	0.613142	0.57819	0.437071	0.52245	0.460845	0.502391	0.640877	0.494459	0.37467	0.385985	0.609313	0.394211	0.539254	0.593099	0.63572	0.39882		0.507068	0.0208077
133	396	6.6	1.326	1.29	1.372	1.708	1.518	1.704	1.911	1.66	1.548	1.924	1.475	1.7	1.793	2.066	1.509	1.522	1.626	1.633	1.526	1.891		6.6	0.344774	0.38914	0.452507	0.44456	0.590202	0.544931	0.397545	0.493607	0.436056	0.460067	0.610261	0.448549	0.33843	0.343875	0.595501	0.389857	0.492877	0.557909	0.600315	0.371878		0.480261	0.0205329
134	399	6.65	1.504	1.383	1.497	1.716	1.535	1.77	1.967	1.687	1.653	1.98	1.522	1.75	1.876	2.136	1.567	1.616	1.691	1.658	1.6	1.869		6.65	0.391056	0.417195	0.493734	0.446642	0.596812	0.566038	0.409195	0.501635	0.465634	0.473458	0.629706	0.461741	0.354096	0.355526	0.61839	0.413934	0.51258	0.56645	0.629426	0.367552		0.474341	0.0205708
135	402	6.7	1.776	1.519	1.545	1.769	1.537	1.787	1.893	1.68	1.745	2.047	1.577	1.706	2.092	2.2	1.686	1.772	1.742	1.7	1.624	1.91		6.7	0.461778	0.45822	0.509565	0.460437	0.597589	0.571474	0.393801	0.499554	0.491549	0.489479	0.652462	0.450132	0.394866	0.366178	0.665351	0.453893	0.528039	0.580799	0.638867	0.375615		0.492761	0.0203332
136	405	6.75	1.539	1.411	1.513	1.701	1.5	1.729	1.903	1.66	1.667	1.984	1.511	1.702	1.901	2.112	1.575	1.689	1.669	1.672	1.621	1.82		6.75	0.400156	0.425641	0.499011	0.442738	0.583204	0.552926	0.395881	0.493607	0.469577	0.474414	0.625155	0.449077	0.358815	0.351531	0.621547	0.432633	0.505911	0.571233	0.637687	0.357915		0.492208	0.0204291
137	408	6.8	1.522	1.387	1.47	1.674	1.466	1.701	1.803	1.62	1.631	1.929	1.48	1.663	1.844	2.077	1.506	1.631	1.636	1.629	1.604	1.791		6.8	0.395736	0.418401	0.484828	0.435711	0.569984	0.543972	0.375078	0.481713	0.459437	0.461263	0.612329	0.438786	0.348056	0.345706	0.594317	0.417777	0.495908	0.556543	0.630999	0.352212		0.476685	0.0200032
138	411	6.85	1.407	1.393	1.55	1.715	1.485	1.711	1.898	1.648	1.676	1.97	1.485	1.705	1.823	2.071	1.532	1.559	1.653	1.625	1.627	1.78		6.85	0.365835	0.420211	0.511214	0.446382	0.577372	0.54717	0.394841	0.490039	0.472113	0.471066	0.614398	0.449868	0.344092	0.344707	0.604578	0.399334	0.501061	0.555176	0.640047	0.350049		0.472958	0.0209049
139	414	6.9	1.59	1.422	1.581	1.731	1.509	1.73	1.861	1.635	1.674	1.968	1.503	1.707	1.901	2.104	1.597	1.691	1.668	1.641	1.597	1.875		6.9	0.413417	0.428959	0.521438	0.450547	0.586703	0.553246	0.387144	0.486173	0.471549	0.470588	0.621845	0.450396	0.358815	0.3502	0.630229	0.433145	0.505608	0.560642	0.628245	0.368732		0.479429	0.0201118
140	417	6.95	1.548	1.432	1.522	1.715	1.492	1.683	1.817	1.641	1.633	1.91	1.494	1.696	1.857	2.027	1.545	1.639	1.619	1.581	1.56	1.812		6.95	0.402496	0.431976	0.501979	0.446382	0.580093	0.538216	0.37799	0.487957	0.46	0.456719	0.618122	0.447493	0.35051	0.337383	0.609708	0.419826	0.490755	0.540143	0.61369	0.356342		0.478635	0.0197654
141	420	7	1.519	1.431	1.515	1.647	1.475	1.659	1.786	1.618	1.63	1.926	1.5	1.666	1.854	1.991	1.57	1.649	1.599	1.569	1.563	1.748		7	0.394956	0.431674	0.49967	0.428683	0.573484	0.53054	0.371542	0.481118	0.459155	0.460545	0.620604	0.439578	0.349943	0.331391	0.619574	0.422387	0.484692	0.536044	0.61487	0.343756		0.47155	0.020356
142	423	7.05	1.605	1.433	1.49	1.659	1.437	1.639	1.733	1.609	1.6	1.862	1.478	1.634	1.789	1.981	1.506	1.65	1.562	1.576	1.58	1.718		7.05	0.417317	0.432278	0.491425	0.431806	0.558709	0.524145	0.360516	0.478442	0.450704	0.445242	0.611502	0.431135	0.337675	0.329727	0.594317	0.422643	0.473477	0.538435	0.621558	0.337856		0.467078	0.0199267
143	426	7.1	1.626	1.544	1.582	1.792	1.557	1.713	1.847	1.66	1.673	1.906	1.51	1.734	1.881	2.063	1.578	1.684	1.66	1.632	1.596	1.811		7.1	0.422777	0.465762	0.521768	0.466424	0.605365	0.547809	0.384231	0.493607	0.471268	0.455763	0.624741	0.45752	0.35504	0.343375	0.622731	0.431352	0.503183	0.557567	0.627852	0.356146		0.47508	0.0203469
144	429	7.15	1.599	1.485	1.577	1.662	1.436	1.652	1.686	1.567	1.582	1.846	1.451	1.597	1.776	1.911	1.514	1.632	1.584	1.557	1.504	1.724		7.15	0.415757	0.447964	0.520119	0.432587	0.55832	0.528302	0.350739	0.465953	0.445634	0.441416	0.600331	0.421372	0.335221	0.318076	0.597474	0.418033	0.480145	0.531944	0.59166	0.339036		0.473859	0.0197585
145	432	7.2	1.584	1.516	1.54	1.61	1.455	1.603	1.689	1.539	1.616	1.804	1.459	1.626	1.755	1.951	1.5	1.624	1.519	1.522	1.51	1.65		7.2	0.411856	0.457315	0.507916	0.419053	0.565708	0.512632	0.351363	0.457627	0.455211	0.431373	0.603641	0.429024	0.331257	0.324734	0.591949	0.415984	0.460443	0.519986	0.59402	0.324484		0.460141	0.019773
146	435	7.25	1.557	1.478	1.519	1.623	1.397	1.547	1.565	1.474	1.544	1.754	1.407	1.542	1.675	1.802	1.456	1.557	1.475	1.507	1.449	1.58		7.25	0.404836	0.445852	0.500989	0.422436	0.543157	0.494723	0.325567	0.438299	0.43493	0.419417	0.582127	0.40686	0.316157	0.299933	0.574586	0.398822	0.447105	0.514862	0.570024	0.310718		0.450424	0.0197143
147	438	7.3	1.613	1.563	1.549	1.61	1.445	1.6	1.653	1.533	1.585	1.797	1.436	1.59	1.746	1.881	1.559	1.656	1.522	1.493	1.483	1.616		7.3	0.419397	0.471493	0.510884	0.419053	0.56182	0.511673	0.343874	0.455843	0.446479	0.429699	0.594125	0.419525	0.329558	0.313083	0.615233	0.42418	0.461352	0.510079	0.583399	0.317797		0.449749	0.0202006
148	441	7.35	1.615	1.531	1.573	1.622	1.404	1.55	1.556	1.463	1.579	1.733	1.414	1.558	1.656	1.768	1.465	1.599	1.467	1.48	1.452	1.571		7.35	0.419917	0.46184	0.518799	0.422176	0.545879	0.495683	0.323695	0.435028	0.444789	0.414395	0.585023	0.411082	0.312571	0.294274	0.578137	0.40958	0.44468	0.505637	0.571204	0.308948		0.451047	0.0200973
149	444	7.4	1.581	1.523	1.538	1.557	1.407	1.556	1.545	1.456	1.568	1.706	1.406	1.547	1.661	1.748	1.448	1.545	1.45	1.477	1.465	1.529		7.4	0.411076	0.459427	0.507256	0.405258	0.547045	0.497602	0.321406	0.432947	0.44169	0.407939	0.581713	0.408179	0.313515	0.290945	0.571429	0.395748	0.439527	0.504612	0.576318	0.300688		0.442941	0.0203627
150	447	7.45	1.584	1.563	1.54	1.551	1.401	1.517	1.555	1.47	1.559	1.734	1.381	1.564	1.612	1.781	1.467	1.593	1.48	1.476	1.439	1.572		7.45	0.411856	0.471493	0.507916	0.403696	0.544712	0.48513	0.323487	0.43711	0.439155	0.414634	0.571369	0.412665	0.304266	0.296438	0.578927	0.408043	0.448621	0.504271	0.56609	0.309145		0.441334	0.0198319
151	450	7.5	1.585	1.585	1.566	1.612	1.388	1.531	1.557	1.464	1.535	1.689	1.407	1.55	1.647	1.735	1.411	1.606	1.471	1.479	1.456	1.542		7.5	0.412116	0.47813	0.516491	0.419573	0.539658	0.489607	0.323903	0.435326	0.432394	0.403874	0.582127	0.408971	0.310872	0.288782	0.556827	0.411373	0.445893	0.505296	0.572777	0.303245		0.441906	0.0199663
152	453	7.55	1.527	1.509	1.582	1.51	1.367	1.5	1.52	1.435	1.534	1.624	1.379	1.489	1.61	1.647	1.475	1.595	1.437	1.423	1.457	1.479		7.55	0.397036	0.455204	0.521768	0.393024	0.531493	0.479693	0.316206	0.426702	0.432113	0.388331	0.570542	0.392876	0.303888	0.274134	0.582084	0.408555	0.435587	0.486163	0.573171	0.290855		0.437416	0.020949
153	456	7.6	1.708	1.712	1.733	1.534	1.411	1.541	1.449	1.444	1.591	1.639	1.405	1.442	1.586	1.577	1.494	1.685	1.422	1.448	1.478	1.45		7.6	0.444098	0.51644	0.57157	0.399271	0.5486	0.492805	0.301435	0.429379	0.448169	0.391918	0.581299	0.380475	0.299358	0.262483	0.589582	0.431609	0.43104	0.494704	0.581432	0.285152		0.438506	0.0232309
154	459	7.65	2.017	2.241	2.22	1.746	1.642	1.707	1.632	1.547	1.874	1.937	1.596	1.527	1.957	1.705	1.714	2.04	1.57	1.612	1.669	1.748		7.65	0.524441	0.676018	0.73219	0.454451	0.638414	0.545891	0.339505	0.460006	0.527887	0.463176	0.660323	0.402902	0.369385	0.283788	0.676401	0.522541	0.475902	0.550735	0.65657	0.343756		0.479627	0.0288526
155	462	7.7	2.175	2.468	2.407	1.8	1.723	1.761	1.717	1.653	1.956	2.155	1.661	1.602	2.21	1.814	1.904	2.302	1.641	1.716	1.806	1.993		7.7	0.565523	0.744495	0.793865	0.468506	0.669907	0.56316	0.357187	0.491525	0.550986	0.515304	0.687216	0.422691	0.417139	0.301931	0.751381	0.589652	0.497423	0.586266	0.710464	0.391937		0.534521	0.0312631
156	465	7.75	2.665	2.714	2.696	1.854	1.831	1.936	1.777	1.731	2.139	2.48	1.732	1.615	2.505	2.034	2.093	2.642	1.762	1.817	1.848	2.163		7.75	0.692928	0.818703	0.889182	0.482561	0.711897	0.619124	0.369669	0.514719	0.602535	0.593018	0.716591	0.426121	0.47282	0.338549	0.825967	0.676742	0.534101	0.620772	0.726987	0.425369		0.578373	0.0349318
157	468	7.8	3.243	3.202	3.015	2.062	1.967	2.192	2.057	1.944	2.45	3.105	1.935	1.816	3.056	2.338	2.33	3.271	1.976	2.045	2.079	2.685		7.8	0.843214	0.965913	0.994393	0.5367	0.764774	0.700991	0.427918	0.578055	0.690141	0.742468	0.800579	0.479156	0.576821	0.389148	0.919495	0.837859	0.598969	0.698668	0.81786	0.528024		0.648737	0.0394204
158	471	7.85	3.347	3.095	2.888	2.015	1.945	2.202	2.003	2.001	2.451	3.291	1.901	1.801	3.35	2.48	2.277	3.445	1.979	2.079	2.037	2.773		7.85	0.870255	0.933635	0.952507	0.524466	0.756221	0.704189	0.416684	0.595004	0.690423	0.786944	0.786512	0.475198	0.632314	0.412783	0.898579	0.882428	0.599879	0.710284	0.801338	0.545329		0.696653	0.0377793
159	474	7.9	3.578	3.124	2.918	2.007	1.856	2.256	1.99	2.053	2.465	3.446	1.918	1.812	3.572	2.656	2.19	3.577	1.98	2.11	2.079	2.885		7.9	0.930317	0.942383	0.962401	0.522384	0.721617	0.721458	0.41398	0.610467	0.694366	0.824008	0.793546	0.4781	0.674217	0.442077	0.864246	0.91624	0.600182	0.720875	0.81786	0.567355		0.704826	0.0382781
160	477	7.95	3.774	3.315	3.032	2.214	2.028	2.473	2.195	2.307	2.715	3.732	2.065	1.969	4.056	3.033	2.34	3.904	2.187	2.267	2.161	3.375		7.95	0.981279	1	1	0.576262	0.788491	0.790854	0.456626	0.685995	0.764789	0.892396	0.854365	0.519525	0.765572	0.504827	0.923441	1	0.662928	0.774513	0.850118	0.663717		0.741844	0.0382065
161	480	8	3.846	3.3	2.943	2.234	2.003	2.512	2.161	2.395	2.868	3.723	2.068	1.971	4.358	3.291	2.342	3.804	2.265	2.319	2.145	3.402		8	1	0.995475	0.970646	0.581468	0.778771	0.803326	0.449553	0.712162	0.807887	0.890244	0.855606	0.520053	0.822575	0.54777	0.92423	0.974385	0.686572	0.792279	0.843824	0.669027		0.777039	0.0366606
162	483	8.05	3.29	3.197	2.778	2.305	2.017	2.512	2.296	2.429	2.93	3.806	2.075	2.097	4.466	3.471	2.286	3.651	2.338	2.299	2.222	3.795		8.05	0.855434	0.964404	0.916227	0.599948	0.784215	0.803326	0.477637	0.722272	0.825352	0.910091	0.858502	0.553298	0.84296	0.57773	0.902131	0.935195	0.7087	0.785446	0.874115	0.746313		0.781729	0.0308399
163	486	8.1	3.293	3.276	2.771	2.487	2.006	2.623	2.46	2.51	3.056	4.012	2.089	2.234	4.587	3.703	2.315	3.582	2.458	2.471	2.237	4.141		8.1	0.856214	0.988235	0.913918	0.647319	0.779938	0.838823	0.511754	0.746357	0.860845	0.95935	0.864295	0.589446	0.865798	0.616345	0.913575	0.91752	0.745074	0.844209	0.880016	0.814356		0.794917	0.0288138
164	489	8.15	3.134	3.215	2.789	2.657	2.052	2.657	2.609	2.629	3.212	4.044	2.159	2.36	4.771	4.008	2.361	3.424	2.536	2.502	2.314	4.284		8.15	0.814873	0.969834	0.919855	0.691567	0.797823	0.849696	0.54275	0.781742	0.904789	0.967001	0.893256	0.622691	0.900529	0.667111	0.931728	0.877049	0.768718	0.8548	0.910307	0.842478		0.81655	0.0261198
165	492	8.2	3.201	3.039	2.697	2.44	1.916	2.629	2.521	2.625	3.067	3.78	2.046	2.148	4.752	4.146	2.276	3.301	2.54	2.434	2.212	4.045		8.2	0.832293	0.916742	0.889512	0.635086	0.744946	0.840742	0.524444	0.780553	0.863944	0.903874	0.846504	0.566755	0.896942	0.69008	0.898185	0.845543	0.76993	0.831568	0.870181	0.795477		0.811297	0.0252465
166	495	8.25	3.018	3.171	2.766	2.704	2.083	2.74	2.874	2.818	3.315	4.132	2.179	2.42	5.081	4.561	2.325	3.276	2.68	2.568	2.281	4.646		8.25	0.784711	0.956561	0.912269	0.7038	0.809876	0.876239	0.597878	0.837942	0.933803	0.988044	0.901531	0.638522	0.959041	0.759154	0.917522	0.839139	0.812367	0.877349	0.897325	0.913668		0.821501	0.0236903
167	498	8.3	2.819	3.058	2.592	2.704	2.066	2.769	2.846	2.793	3.307	3.986	2.156	2.46	4.968	4.69	2.267	3.109	2.702	2.629	2.268	4.766		8.3	0.732969	0.922474	0.854881	0.7038	0.803266	0.885513	0.592053	0.830508	0.931549	0.953132	0.892015	0.649077	0.937712	0.780626	0.894633	0.796363	0.819036	0.898189	0.892211	0.937266		0.8406	0.0227052
168	501	8.35	2.619	2.938	2.491	2.663	2.009	2.707	2.809	2.747	3.2	3.951	2.067	2.445	5.003	4.701	2.255	3.028	2.667	2.523	2.27	4.785		8.35	0.680967	0.886275	0.82157	0.693129	0.781104	0.865686	0.584356	0.81683	0.901408	0.944763	0.855192	0.645119	0.944319	0.782457	0.889897	0.775615	0.808427	0.861975	0.892998	0.941003		0.827009	0.0228568
169	504	8.4	2.82	3.162	2.69	2.894	2.128	2.761	3.071	2.841	3.409	4.12	2.173	2.652	5.298	4.954	2.318	3.204	2.798	2.588	2.24	5.074		8.4	0.733229	0.953846	0.887203	0.753254	0.827372	0.882955	0.63886	0.844781	0.960282	0.985175	0.899048	0.699736	1	0.824567	0.914759	0.820697	0.848136	0.884182	0.881196	0.997837		0.840255	0.0221346
170	507	8.45	2.645	2.952	2.588	2.871	2.091	2.715	3.066	2.838	3.35	3.924	2.142	2.653	5.122	5.005	2.262	3.165	2.744	2.54	2.294	4.904		8.45	0.687728	0.890498	0.853562	0.747267	0.812986	0.868244	0.63782	0.843889	0.943662	0.938307	0.886223	0.7	0.96678	0.833056	0.89266	0.810707	0.831767	0.867783	0.902439	0.964405		0.852922	0.0204383
171	510	8.5	2.617	2.968	2.616	2.935	2.145	2.768	3.224	2.917	3.361	4.02	2.136	2.78	5.269	5.135	2.376	3.159	2.839	2.652	2.38	4.954		8.5	0.680447	0.895324	0.862797	0.763925	0.833981	0.885193	0.670689	0.86738	0.946761	0.961263	0.88374	0.733509	0.994526	0.854694	0.937648	0.80917	0.860564	0.906047	0.936271	0.974238		0.853449	0.0206367
172	513	8.55	2.54	2.943	2.6	2.966	2.087	2.763	3.354	2.917	3.364	4.071	2.193	2.754	5.159	5.259	2.363	3.147	2.84	2.574	2.282	4.947		8.55	0.660426	0.887783	0.85752	0.771994	0.811431	0.883594	0.697732	0.86738	0.947606	0.973458	0.907323	0.726649	0.973764	0.875333	0.932518	0.806096	0.860867	0.879399	0.897718	0.972861		0.86124	0.0201376
173	516	8.6	2.436	2.97	2.676	3.036	2.112	2.792	3.366	2.979	3.352	3.977	2.143	2.84	5.087	5.396	2.364	3.161	2.876	2.578	2.361	4.766		8.6	0.633385	0.895928	0.882586	0.790213	0.821151	0.892869	0.700229	0.885816	0.944225	0.95098	0.886636	0.74934	0.960174	0.898136	0.932912	0.809682	0.871779	0.880765	0.928796	0.937266		0.861108	0.0195748
174	519	8.65	2.508	2.943	2.798	3.087	2.193	2.962	3.503	2.989	3.395	4.061	2.177	2.881	5.161	5.516	2.42	3.2	2.879	2.683	2.304	4.81		8.65	0.652106	0.887783	0.922823	0.803488	0.852644	0.947234	0.728729	0.88879	0.956338	0.971066	0.900703	0.760158	0.974141	0.918109	0.955012	0.819672	0.872689	0.916638	0.906373	0.945919		0.870832	0.0193868
175	522	8.7	2.442	2.924	2.704	3.122	2.172	2.849	3.539	2.923	3.344	3.914	2.185	2.89	5.086	5.528	2.277	3.158	2.899	2.664	2.269	4.752		8.7	0.634945	0.882051	0.891821	0.812598	0.844479	0.911097	0.736218	0.869164	0.941972	0.935916	0.904013	0.762533	0.959985	0.920107	0.898579	0.808914	0.878751	0.910147	0.892604	0.934513		0.872771	0.0179848
176	525	8.75	2.32	2.819	2.586	3.027	2.13	2.767	3.48	2.917	3.23	3.863	2.071	2.835	4.971	5.46	2.307	3.082	2.843	2.61	2.286	4.556		8.75	0.603224	0.850377	0.852902	0.787871	0.828149	0.884874	0.723944	0.86738	0.909859	0.923721	0.856847	0.748021	0.938279	0.908788	0.910418	0.789447	0.861776	0.891698	0.899292	0.895969		0.856581	0.0182726
177	528	8.8	2.429	3.085	2.865	3.343	2.294	3.009	3.83	3.154	3.517	4.178	2.227	3.153	5.156	5.714	2.379	3.23	3.028	2.769	2.424	4.846		8.8	0.631565	0.930618	0.944921	0.87012	0.891913	0.962264	0.796755	0.937853	0.990704	0.999044	0.92139	0.831926	0.973197	0.951065	0.938832	0.827357	0.917854	0.94602	0.95358	0.952999		0.87757	0.0189522
178	531	8.85	2.307	2.96	2.699	3.172	2.207	2.917	3.69	3.002	3.42	4.014	2.194	3.138	5.005	5.7	2.274	3.233	2.966	2.624	2.329	4.833		8.85	0.599844	0.892911	0.890172	0.825612	0.858087	0.932843	0.767631	0.892655	0.96338	0.959828	0.907737	0.827968	0.944696	0.948735	0.897395	0.828125	0.89906	0.896481	0.916208	0.950442		0.894245	0.0187356
179	534	8.9	2.315	2.907	2.639	3.15	2.223	2.884	3.743	3.06	3.325	4.047	2.182	3.13	4.879	5.742	2.392	3.174	2.952	2.672	2.331	4.854		8.9	0.601924	0.876923	0.870383	0.819885	0.864308	0.92229	0.778656	0.909902	0.93662	0.967719	0.902772	0.825858	0.920914	0.955726	0.943962	0.813012	0.894817	0.91288	0.916994	0.954572		0.879748	0.0186945
180	537	8.95	2.23	2.91	2.655	3.248	2.256	2.846	3.831	3.126	3.412	3.996	2.267	3.13	4.968	5.713	2.359	3.266	2.998	2.692	2.391	4.752		8.95	0.579823	0.877828	0.87566	0.845393	0.877138	0.910138	0.796963	0.929527	0.961127	0.955524	0.93794	0.825858	0.937712	0.950899	0.930939	0.836578	0.90876	0.919713	0.940598	0.934513		0.883069	0.0192745
181	540	9	2.23	2.869	2.633	3.268	2.302	2.956	3.905	3.086	3.402	4.082	2.213	3.231	4.944	5.821	2.314	3.168	3.008	2.758	2.352	4.828		9	0.579823	0.86546	0.868404	0.850599	0.895023	0.945315	0.812357	0.917633	0.95831	0.976088	0.915598	0.852507	0.933182	0.968875	0.913181	0.811475	0.911791	0.942262	0.925256	0.949459		0.888131	0.0195756
182	543	9.05	2.178	2.895	2.652	3.322	2.315	2.865	3.947	3.09	3.299	3.99	2.185	3.265	4.85	5.735	2.389	3.192	2.98	2.672	2.283	4.834		9.05	0.566303	0.873303	0.87467	0.864654	0.900078	0.916214	0.821094	0.918822	0.929296	0.954089	0.904013	0.861478	0.91544	0.954561	0.942778	0.817623	0.903304	0.91288	0.898112	0.950639		0.886799	0.0188847
183	546	9.1	2.147	2.789	2.547	3.248	2.223	2.832	3.843	3.087	3.208	3.912	2.178	3.154	4.688	5.626	2.386	3.274	3.013	2.642	2.348	4.88		9.1	0.558242	0.841327	0.84004	0.845393	0.864308	0.90566	0.799459	0.91793	0.903662	0.935438	0.901117	0.83219	0.884862	0.936418	0.941594	0.838627	0.913307	0.902631	0.923682	0.959685		0.878123	0.0192226
184	549	9.15	2.237	2.978	2.65	3.471	2.412	2.98	4.146	3.23	3.384	4.124	2.343	3.407	4.937	5.929	2.499	3.452	3.053	2.79	2.466	5.044		9.15	0.581643	0.898341	0.874011	0.903436	0.937792	0.95299	0.862492	0.960452	0.953239	0.986131	0.969384	0.898945	0.931861	0.986851	0.986188	0.884221	0.925432	0.953194	0.970102	0.991937		0.896355	0.0199431
185	552	9.2	2.161	2.752	2.508	3.214	2.224	2.847	3.97	3.02	3.148	3.91	2.157	3.182	4.548	5.562	2.356	3.306	2.973	2.698	2.299	4.709		9.2	0.561882	0.830166	0.827177	0.836543	0.864697	0.910457	0.825879	0.898008	0.886761	0.934959	0.892429	0.839578	0.858437	0.925766	0.929755	0.846824	0.901182	0.921763	0.904406	0.926057		0.893284	0.0181247
186	555	9.25	2.189	2.93	2.717	3.47	2.394	3.004	4.274	3.189	3.337	4.059	2.241	3.39	4.848	5.842	2.432	3.398	3.16	2.861	2.394	4.916		9.25	0.569163	0.883861	0.896108	0.903175	0.930793	0.960665	0.88912	0.94826	0.94	0.970588	0.927182	0.894459	0.915062	0.97237	0.959747	0.870389	0.957866	0.977451	0.941778	0.966765		0.889938	0.0195914
187	558	9.3	2.177	2.829	2.613	3.318	2.342	2.941	4.15	3.098	3.218	3.968	2.245	3.366	4.662	5.759	2.393	3.399	3.083	2.733	2.384	4.727		9.3	0.566043	0.853394	0.861807	0.863613	0.910575	0.940518	0.863324	0.921201	0.906479	0.948828	0.928837	0.888127	0.879955	0.958555	0.944357	0.870645	0.934526	0.933721	0.937844	0.929597		0.902919	0.0187418
188	561	9.35	2.124	2.815	2.624	3.382	2.304	2.935	4.162	3.112	3.177	3.898	2.231	3.364	4.572	5.734	2.333	3.362	3.089	2.73	2.371	4.822		9.35	0.552262	0.84917	0.865435	0.880271	0.895801	0.938599	0.865821	0.925364	0.89493	0.93209	0.923045	0.887599	0.862967	0.954394	0.920679	0.861168	0.936344	0.932696	0.93273	0.948279		0.89004	0.0191475
189	564	9.4	2.16	2.891	2.664	3.513	2.407	3.004	4.374	3.246	3.325	4.087	2.301	3.491	4.711	5.924	2.446	3.381	3.127	2.831	2.401	4.928		9.4	0.561622	0.872097	0.878628	0.914368	0.935848	0.960665	0.909923	0.96521	0.93662	0.977284	0.952007	0.921108	0.889203	0.986019	0.965272	0.866035	0.947863	0.967202	0.944532	0.969125		0.902007	0.0203314
190	567	9.45	2.167	2.824	2.663	3.413	2.363	2.951	4.334	3.11	3.251	4.011	2.239	3.432	4.645	5.809	2.428	3.394	3.099	2.732	2.389	4.871		9.45	0.563443	0.851885	0.878298	0.888339	0.91874	0.943716	0.901602	0.92477	0.915775	0.95911	0.926355	0.905541	0.876746	0.966877	0.958169	0.869365	0.939376	0.933379	0.939811	0.957915		0.908496	0.0192258
191	570	9.5	2.143	2.856	2.706	3.424	2.374	2.986	4.353	3.175	3.271	3.977	2.253	3.425	4.62	5.754	2.342	3.361	3.05	2.79	2.369	4.883		9.5	0.557202	0.861538	0.89248	0.891202	0.923017	0.954909	0.905554	0.944098	0.921408	0.95098	0.932147	0.903694	0.872027	0.957723	0.92423	0.860912	0.924523	0.953194	0.931943	0.960275		0.901057	0.0194013
192	573	9.55	2.087	2.717	2.646	3.363	2.371	2.947	4.2	3.191	3.207	3.907	2.211	3.413	4.515	5.561	2.392	3.419	2.963	2.758	2.386	4.751		9.55	0.542642	0.819608	0.872691	0.875325	0.921851	0.942437	0.873726	0.948855	0.90338	0.934242	0.91477	0.900528	0.852208	0.925599	0.943962	0.875768	0.898151	0.942262	0.938631	0.934317		0.8946	0.0198243
193	576	9.6	2.178	2.925	2.801	3.549	2.513	3.038	4.53	3.261	3.362	4.182	2.379	3.589	4.739	5.945	2.478	3.525	3.154	2.889	2.421	5.085		9.6	0.566303	0.882353	0.923813	0.923738	0.977061	0.971538	0.942376	0.96967	0.947042	1	0.984278	0.946966	0.894488	0.989514	0.977901	0.90292	0.956047	0.987017	0.9524	1		0.911409	0.0208643
194	579	9.65	2.043	2.725	2.643	3.345	2.291	2.925	4.224	3.092	3.147	3.936	2.224	3.29	4.451	5.568	2.311	3.394	3.005	2.687	2.36	4.667		9.65	0.531201	0.822021	0.871702	0.87064	0.890747	0.935401	0.878719	0.919417	0.886479	0.941176	0.920149	0.868074	0.840128	0.926764	0.911997	0.869365	0.910882	0.918005	0.928403	0.917797		0.906362	0.0196319
195	582	9.7	2.169	2.967	2.769	3.524	2.556	3.099	4.575	3.301	3.384	4.174	2.393	3.618	4.739	5.937	2.534	3.489	3.226	2.884	2.521	4.935		9.7	0.563963	0.895023	0.913259	0.917231	0.993779	0.991046	0.951737	0.981564	0.953239	0.998087	0.99007	0.954617	0.894488	0.988182	1	0.893699	0.977872	0.985309	0.991739	0.970501		0.909112	0.021492
196	585	9.75	2.097	2.809	2.684	3.396	2.343	2.937	4.327	3.095	3.203	3.97	2.313	3.434	4.511	5.682	2.358	3.436	3.103	2.747	2.385	4.766		9.75	0.545242	0.84736	0.885224	0.883915	0.910964	0.939239	0.900146	0.920309	0.902254	0.949307	0.956971	0.906069	0.851453	0.945739	0.930545	0.880123	0.940588	0.938504	0.938238	0.937266		0.917872	0.0197511
197	588	9.8	2.071	2.875	2.719	3.481	2.408	2.94	4.521	3.166	3.303	3.958	2.26	3.505	4.592	5.764	2.36	3.483	3.143	2.791	2.421	4.872		9.8	0.538482	0.86727	0.896768	0.906039	0.936236	0.940198	0.940503	0.941421	0.930423	0.946437	0.935043	0.924802	0.866742	0.959387	0.931334	0.892162	0.952713	0.953536	0.9524	0.958112		0.901987	0.0204568
198	591	9.85	2.089	2.806	2.706	3.536	2.437	3.043	4.492	3.253	3.264	3.979	2.26	3.531	4.568	5.803	2.461	3.426	3.182	2.875	2.384	4.904		9.85	0.543162	0.846456	0.89248	0.920354	0.947512	0.973137	0.934471	0.967291	0.919437	0.951459	0.935043	0.931662	0.862212	0.965879	0.971192	0.877561	0.964535	0.982234	0.937844	0.964405		0.911458	0.0213333
199	594	9.9	2.195	2.927	2.752	3.657	2.499	3.095	4.62	3.309	3.412	4.07	2.346	3.66	4.743	5.93	2.48	3.587	3.295	2.826	2.512	5.011		9.9	0.570723	0.882956	0.907652	0.951848	0.971617	0.989767	0.961098	0.983943	0.961127	0.973219	0.970625	0.965699	0.895243	0.987017	0.97869	0.918801	0.998788	0.965494	0.988198	0.985447		0.927407	0.0208035
200	597	9.95	2.098	2.842	2.632	3.531	2.462	2.987	4.507	3.189	3.315	3.952	2.25	3.539	4.551	5.677	2.406	3.486	3.192	2.803	2.42	4.845		9.95	0.545502	0.857315	0.868074	0.919053	0.957232	0.955229	0.937591	0.94826	0.933803	0.945002	0.930906	0.933773	0.859003	0.944907	0.949487	0.89293	0.967566	0.957636	0.952006	0.952802		0.925401	0.0206229
201	600	10	2.133	2.97	2.782	3.663	2.452	3.023	4.499	3.232	3.317	4.109	2.293	3.607	4.653	5.845	2.46	3.424	3.2	2.847	2.475	4.837		10	0.554602	0.895928	0.917546	0.95341	0.953344	0.966741	0.935927	0.961047	0.934366	0.982544	0.948697	0.951715	0.878256	0.97287	0.970797	0.877049	0.969991	0.972668	0.973643	0.951229		0.918261	0.020758
202	603	10.05	2.09	2.863	2.651	3.531	2.416	2.977	4.525	3.153	3.266	3.966	2.3	3.559	4.656	5.655	2.407	3.443	3.161	2.811	2.412	4.86		10.05	0.543422	0.86365	0.87434	0.919053	0.939347	0.952031	0.941336	0.937556	0.92	0.94835	0.951593	0.93905	0.878822	0.941245	0.949882	0.881916	0.958169	0.960369	0.948859	0.955752		0.918178	0.0204671
203	606	10.1	2.132	2.88	2.664	3.53	2.426	2.958	4.522	3.304	3.285	4.015	2.311	3.587	4.693	5.794	2.422	3.405	3.164	2.816	2.473	4.857		10.1	0.554342	0.868778	0.878628	0.918792	0.943235	0.945955	0.940711	0.982456	0.925352	0.960067	0.956144	0.946438	0.885806	0.964381	0.955801	0.872182	0.959079	0.962077	0.972856	0.955162		0.913825	0.0205916
204	609	10.15	2.072	2.826	2.609	3.439	2.416	2.985	4.346	3.15	3.19	3.883	2.244	3.432	4.529	5.471	2.396	3.495	3.103	2.765	2.348	4.599		10.15	0.538742	0.852489	0.860488	0.895107	0.939347	0.954589	0.904098	0.936664	0.898592	0.928503	0.928424	0.905541	0.854851	0.910619	0.945541	0.895236	0.940588	0.944653	0.923682	0.904425		0.90526	0.019829
205	612	10.2	2.172	2.94	2.729	3.594	2.49	2.971	4.559	3.164	3.282	4.006	2.293	3.645	4.689	5.662	2.377	3.498	3.154	2.842	2.394	4.799		10.2	0.564743	0.886878	0.900066	0.93545	0.968118	0.950112	0.948409	0.940827	0.924507	0.957915	0.948697	0.961741	0.885051	0.94241	0.938043	0.896004	0.956047	0.97096	0.941778	0.943756		0.905592	0.0194607
206	615	10.25	2.201	2.976	2.744	3.657	2.503	3.01	4.707	3.242	3.299	4.055	2.392	3.689	4.797	5.696	2.429	3.609	3.206	2.871	2.542	4.939		10.25	0.572283	0.897738	0.905013	0.951848	0.973173	0.962584	0.979197	0.96402	0.929296	0.969632	0.989657	0.973351	0.905436	0.948069	0.958564	0.924436	0.97181	0.980868	1	0.971288		0.927244	0.0202297
207	618	10.3	2.166	2.941	2.722	3.614	2.448	2.951	4.543	3.264	3.339	3.999	2.342	3.647	4.685	5.73	2.445	3.594	3.128	2.85	2.476	4.804		10.3	0.563183	0.887179	0.897757	0.940656	0.951788	0.943716	0.94508	0.970562	0.940563	0.956241	0.96897	0.962269	0.884296	0.953728	0.964878	0.920594	0.948166	0.973693	0.974036	0.944739		0.930509	0.0199478
208	621	10.35	2.274	3.144	2.793	3.763	2.566	3.12	4.807	3.363	3.471	4.111	2.417	3.764	4.932	6.008	2.477	3.627	3.298	2.911	2.513	4.951		10.35	0.591264	0.948416	0.921174	0.979438	0.997667	0.997761	1	1	0.977746	0.983022	1	0.99314	0.930917	1	0.977506	0.929047	0.999697	0.994534	0.988592	0.973648		0.941892	0.0201992
209	624	10.4	2.17	2.983	2.727	3.566	2.452	2.981	4.545	3.147	3.36	3.954	2.309	3.604	4.784	5.663	2.391	3.517	3.156	2.879	2.405	4.747		10.4	0.564223	0.899849	0.899406	0.928162	0.953344	0.95331	0.945496	0.935772	0.946479	0.945481	0.955317	0.950923	0.902982	0.942577	0.943567	0.900871	0.956654	0.983601	0.946105	0.93353		0.93928	0.0193387
210	627	10.45	2.291	3.203	2.884	3.842	2.572	3.127	4.784	3.343	3.55	4.147	2.408	3.79	5.093	5.993	2.521	3.711	3.299	2.927	2.495	5.054		10.45	0.595684	0.966214	0.951187	1	1	1	0.995215	0.994053	1	0.991631	0.996276	1	0.961306	0.997503	0.99487	0.950564	1	1	0.981511	0.993904		0.943939	0.0199763
211	630	10.5	2.116	2.968	2.647	3.493	2.444	2.943	4.5	3.2	3.208	3.93	2.259	3.572	4.701	5.474	2.364	3.503	3.08	2.803	2.39	4.77		10.5	0.550182	0.895324	0.873021	0.909162	0.950233	0.941158	0.936135	0.951531	0.903662	0.939742	0.93463	0.94248	0.887316	0.911119	0.932912	0.897285	0.933616	0.957636	0.940205	0.938053		0.937383	0.0194724

## Sheet: Fig.1C (GSK)
0	0.111732	0.0244313	0.0660125	0.11789	0.0402576	0.00676983	0.00535906	0.176861	0.0889541	0.322105	0.0296736	0.0290135	0.053316	0.0212054	0.0301003	0.0654045	0.103448	0.129288	0.0866667	0.0739372	0.0428894	0.00320513	0	0.199438	0.311155	0	0.023569	0.239374	0.0714286	0.0105541	0	0.174603	0.0764706	0.00487211	0.0973822	0.0287129	0	0.0219178	0.248731	0.111111	0.319202	0.129838	0.144828	0.258727	0.255319	0.0798319	0.338552	0.196121	0.0972222
0.05	0.115722	0.0278012	0.0677966	0.121187	0.041868	0.0116054	0.00857449	0.159912	0.0821114	0.28	0.0296736	0.0251451	0.0377113	0.0133929	0.0351171	0.0585198	0.0944528	0.110818	0.0746667	0.0683919	0.0677201	0	0.0337711	0.210674	0.309198	0.0110294	0.0505051	0.234899	0.0931677	0.0501319	0.0588235	0.107143	0.05	0	0.0806283	0.0108911	0.0188457	0.0136986	0.192893	0.162963	0.301746	0.118602	0.165517	0.219713	0.269504	0.0168067	0.320939	0.18319	0.0694444
0.1	0.139665	0.0379107	0.0677966	0.120363	0.041868	0.016441	0	0.194547	0.112414	0.346316	0.00890208	0.0174081	0.0442133	0.0145089	0.0301003	0.070568	0.0869565	0.145119	0.101333	0.0831793	0.0428894	0.0448718	0.0262664	0.188202	0.313112	0.0275735	0.0673401	0.230425	0.0745342	0.0211082	0.16263	0.0357143	0.0514706	0.0194884	0.0879581	0.0356436	0.0742049	0.0479452	0.218274	0.274074	0.294264	0.113608	0.151724	0.250513	0.28487	0.0630252	0.295499	0.170259	0.0833333
0.15	0.252993	0.0766639	0.0749331	0.13108	0.0466989	0.0154739	0.0096463	0.182019	0.0987292	0.316842	0.00296736	0.00386847	0.023407	0.00446429	0.0200669	0.0395869	0.0794603	0.118734	0.084	0.0591497	0.0699774	0.0384615	0.0168856	0.188202	0.30137	0.0202206	0.03367	0.257271	0.0931677	0.0633245	0.138408	0.123016	0.0338235	0.0158343	0.0827225	0.0435644	0.0482921	0.030137	0.238579	0.177778	0.296758	0.104869	0.131034	0.281314	0.274232	0	0.313112	0.172414	0.0853175
0.2	0.258579	0.0716091	0.0669045	0.130256	0.0410628	0.0299807	0.0203644	0.171702	0.0938416	0.290526	0.0296736	0.0193424	0.0364109	0.0145089	0.0351171	0.0567986	0.0929535	0.147757	0.0813333	0.0628466	0.0519187	0.0961538	0.0712946	0.196629	0.303327	0.0514706	0.111111	0.263982	0.124224	0.0527704	0.16955	0.0238095	0.0397059	0.0255786	0.0649215	0.050495	0.0824499	0.0136986	0.238579	0.266667	0.259352	0.104869	0.131034	0.2423	0.288416	0.0357143	0.332681	0.176724	0.0793651
0.25	0.217079	0.0648694	0.0749331	0.146744	0.0499195	0.0290135	0.0203644	0.16507	0.0899316	0.294737	0.0623145	0.0290135	0.0572172	0.0357143	0.0501672	0.0740103	0.10045	0.155673	0.088	0.0757856	0.1693	0.169872	0.0956848	0.233146	0.313112	0.0735294	0.154882	0.295302	0.23913	0.116095	0.214533	0.0793651	0.0970588	0.0341048	0.0649215	0.0544554	0.0718492	0.0136986	0.258883	0.288889	0.291771	0.0948814	0.0931034	0.244353	0.300236	0.0504202	0.334638	0.172414	0.0376984
0.3	0.146049	0.0387532	0.0713649	0.13108	0.041868	0.0203095	0.073955	0.178335	0.0928641	0.303158	0.0237389	0.0232108	0.0442133	0.0256696	0.0367893	0.080895	0.0869565	0.113456	0.076	0.0628466	0.13544	0.137821	0.136961	0.252809	0.338552	0.0661765	0.10101	0.308725	0.173913	0.0949868	0.262976	0.218254	0.0558824	0.0207065	0.086911	0.0722772	0.0518257	0.0219178	0.187817	0.288889	0.276808	0.0524345	0.0896552	0.23614	0.291962	0.0504202	0.348337	0.198276	0.0555556
0.35	0.132482	0.0320135	0.0776093	0.131904	0.0362319	0.0251451	0.0139335	0.165807	0.0742913	0.294737	0.0326409	0.0251451	0.0208062	0.015625	0.0317726	0.0585198	0.0824588	0.0923483	0.0666667	0.0573013	0.0902935	0.134615	0.123827	0.22191	0.336595	0.0882353	0.154882	0.277405	0.142857	0.0659631	0.321799	0.313492	0.0529412	0.0316687	0.0732984	0.0653465	0.0683157	0.0273973	0.248731	0.303704	0.309227	0.0574282	0.124138	0.23614	0.397163	0.0504202	0.340509	0.189655	0.0515873
0.4	0.115722	0	0.0776093	0.131904	0.0410628	0.0154739	0.0150054	0.167281	0.0772239	0.288421	0.0385757	0.0309478	0.0494148	0.0212054	0.0518395	0.0688468	0.0974513	0.0923483	0.0653333	0.077634	0.0925508	0.157051	0.144465	0.238764	0.344423	0.0716912	0.13468	0.277405	0.158385	0.0659631	0.346021	0.357143	0.0397059	0.0341048	0.0743455	0.0742574	0.0789164	0.0260274	0.253807	0.281481	0.301746	0.0337079	0.103448	0.24846	0.373522	0.0462185	0.318982	0.189655	0.0555556
0.45	0.111732	0.0235889	0.0749331	0.133553	0.037037	0.0116054	0.0182208	0.167281	0.0948192	0.297895	0.0474777	0.032882	0.0585176	0.0212054	0.0468227	0.0774527	0.0809595	0.131926	0.0773333	0.0831793	0.124153	0.134615	0.189493	0.227528	0.35225	0.0772059	0.164983	0.281879	0.124224	0.0791557	0.346021	0.285714	0.0264706	0.0377588	0.0774869	0.0871287	0.0742049	0.0260274	0.263959	0.311111	0.289277	0.00998752	0.12069	0.299795	0.326241	0.0609244	0.295499	0.174569	0.0694444
0.5	0.119713	0.0294861	0.0749331	0.137675	0.0402576	0.0232108	0.0150054	0.170228	0.102639	0.314737	0.0445104	0.0425532	0.0429129	0.015625	0.0468227	0.070568	0.0674663	0.124011	0.0813333	0.0591497	0.14447	0.176282	0.243902	0.294944	0.363992	0.0900735	0.154882	0.313199	0.173913	0.121372	0.204152	0.115079	0.0470588	0.0328867	0.0701571	0.0693069	0.0683157	0	0.187817	0.207407	0.299252	0.0249688	0.124138	0.293634	0.297872	0.0378151	0.268102	0.172414	0.0734127
0.55	0.118117	0.0320135	0.0704728	0.133553	0.0386473	0.016441	0.0139335	0.154016	0.0928641	0.297895	0.0385757	0.0174081	0.0429129	0.015625	0.0401338	0.0499139	0.0704648	0.102902	0.076	0.0462107	0.142212	0.195513	0.225141	0.269663	0.363992	0.104779	0.16835	0.304251	0.173913	0.0765172	0.380623	0.365079	0.0573529	0.045067	0.102618	0.113861	0.101296	0.0657534	0.304569	0.37037	0.276808	0.0249688	0.0344828	0.258727	0.283688	0.0567227	0.291585	0.174569	0.0496032
0.6	0.12929	0.0379107	0.0713649	0.126134	0.037037	0.032882	0.0128617	0.160648	0.101662	0.292632	0.0712166	0.0290135	0.0507152	0.0212054	0.0434783	0.0654045	0.0809595	0.102902	0.08	0.0683919	0.00225734	0.00641026	0.485929	0.36236	0.911937	0.444853	0.23569	0.60179	0	0.163588	0.366782	0.313492	0.107353	0.0548112	0.0680628	0.0663366	0.108363	0.039726	0.294416	0.414815	0.276808	0.0274657	0.0965517	0.2423	0.352246	0.0336134	0.2818	0.157328	0.0277778
0.65	0.130886	0.0395956	0.073149	0.129431	0.037037	0.0425532	0.0214362	0.151805	0.0899316	0.305263	0.0534125	0.032882	0.0377113	0.0178571	0.0401338	0.0636833	0.0764618	0.118734	0.0866667	0.0554529	0.03386	0.0737179	0.0769231	0.0814607	0.0156556	0.362132	0	0.0469799	0.242236	0.00791557	0.190311	0.202381	0.0382353	0.0523752	0.0774869	0.0811881	0.0918728	0.0328767	0.238579	0.259259	0.19202	0.062422	0.144828	0.199179	0.280142	0.052521	0.260274	0.174569	0.0853175
0.7	0.13328	0.0387532	0.0660125	0.127782	0.0297907	0.0454545	0.0182208	0.165807	0.102639	0.328421	0.0534125	0.032882	0.0481144	0.0245536	0.0501672	0.0791738	0.0689655	0.110818	0.0786667	0.0628466	0	0.0576923	0.103189	0.101124	0.0998043	0.375	0.013468	0.0268456	0.220497	0	0.214533	0.309524	0.0558824	0.0548112	0.0837696	0.10099	0.101296	0.0684932	0.304569	0.325926	0.254364	0.138577	0.193103	0.176591	0.219858	0.0441176	0.201566	0.157328	0.0615079
0.75	0.134078	0.0429655	0.0713649	0.137675	0.0354267	0.0386847	0.0235798	0.146647	0.0957967	0.293684	0.0563798	0.0193424	0.0364109	0.0234375	0.0451505	0.0671256	0.0674663	0.0923483	0.0786667	0.0665434	0.0632054	0.105769	0.189493	0.162921	0.131115	0.400735	0.107744	0.0917226	0.282609	0.0765172	0.238754	0.297619	0.0676471	0.0633374	0.0858639	0.10198	0.0859835	0.0575342	0.274112	0.340741	0.25187	0.132335	0.12069	0.186858	0.22104	0.0441176	0.21135	0.157328	0.0634921
0.8	0.132482	0.0395956	0.0669045	0.136026	0.0322061	0.0290135	0.0278671	0.0523213	0	0.14	0.0474777	0.0502901	0.0351105	0.0145089	0.0501672	0.0929432	0.0674663	0	0	0.0609982	0.013544	0.128205	0.161351	0.0842697	0.0880626	0.398897	0.0942761	0.0872483	0.276398	0.0237467	0.204152	0.333333	0.0602941	0.0499391	0.0670157	0.0980198	0.0706714	0.0342466	0.274112	0.2	0.261845	0.131086	0.165517	0.215606	0.218676	0.0651261	0.213307	0.170259	0.0734127
0.85	0.132482	0.0379107	0.0677966	0.137675	0.0322061	0.0251451	0.022508	0.120118	0.100684	0.293684	0.0445104	0.040619	0.0455137	0.0223214	0.0384615	0.0843373	0.0734633	0.0765172	0.0666667	0.0683919	0.0654628	0.153846	0.198874	0.126404	0.1409	0.393382	0.117845	0.107383	0.273292	0.0659631	0.245675	0.349206	0.0544118	0.0584653	0.0680628	0.0980198	0.0730271	0.0506849	0.233503	0.303704	0.276808	0.134831	0.144828	0.197125	0.238771	0.0441176	0.242661	0.148707	0.0615079
0.9	0.140463	0.0454928	0.074041	0.136026	0.0289855	0.0290135	0.0289389	0.120118	0.150538	0.310526	0.0534125	0.0367505	0.0481144	0.0323661	0.0401338	0.0499139	0.083958	0.126649	0.102667	0.0739372	0.0609481	0.176282	0.202627	0.120787	0.136986	0.378676	0.16835	0.116331	0.273292	0.0659631	0.221453	0.373016	0.0294118	0.0621194	0.0722513	0.111881	0.0636042	0.0534247	0.279188	0.22963	0.276808	0.113608	0.134483	0.193018	0.237589	0.0630252	0.225049	0.165948	0.0753968
0.95	0.138069	0.0370682	0.0749331	0.131904	0.020934	0.0183752	0.0160772	0.10538	0.1261	0.278947	0.0445104	0.0212766	0.0403121	0.0234375	0.0334448	0.0447504	0.0554723	0.116095	0.108	0.0573013	0.0902935	0.211538	0.208255	0.16573	0.154599	0.375	0.121212	0.14094	0.291925	0.100264	0.280277	0.376984	0.0397059	0.0548112	0.0502618	0.0920792	0.0942285	0.0273973	0.203046	0.214815	0.269327	0.108614	0.168966	0.195072	0.255319	0.0504202	0.23092	0.148707	0.0694444
1	0.154828	0.0513901	0.0749331	0.136851	0.0249597	0.0348162	0.0150054	0.100221	0.152493	0.304211	0.0712166	0.032882	0.0520156	0.0323661	0.0451505	0.0722892	0.0644678	0.129288	0.118667	0.0628466	0.0632054	0.150641	0.20075	0.106742	0.162427	0.349265	0.124579	0.120805	0.251553	0.100264	0.297578	0.47619	0.0191176	0.0548112	0.060733	0.10198	0.219081	0.0561644	0.28934	0.333333	0.266833	0.106117	0.127586	0.225873	0.265957	0.0462185	0.236791	0.157328	0.0595238
1.05	0.147646	0.0463353	0.0713649	0.14427	0.02657	0.0193424	0.0214362	0.0957996	0.150538	0.309474	0.0296736	0.0154739	0.0403121	0.0256696	0.0334448	0.0464716	0.0389805	0.158311	0.122667	0.0443623	0.0993228	0.240385	0.227017	0.146067	0.21135	0.325368	0.161616	0.161074	0.245342	0.110818	0.363322	0.551587	0.05	0.0669915	0.0712042	0.122772	0.241461	0.0616438	0.365482	0.422222	0.259352	0.107366	0.155172	0.250513	0.265957	0.0462185	0.238748	0.142241	0.0793651
1.1	0.145251	0.042123	0.0624442	0.141797	0.0201288	0.016441	0.0182208	0.0876934	0.147605	0.326316	0.0267062	0.0116054	0.0208062	0.0133929	0.0317726	0.0464716	0.0344828	0.184697	0.141333	0.0332717	0.142212	0.304487	0.257036	0.179775	0.209393	0.371324	0.239057	0.201342	0.276398	0.168865	0.280277	0.43254	0.0617647	0.0742996	0.0439791	0.0712871	0.210836	0.0315068	0.243655	0.362963	0.279302	0.156055	0.0689655	0.141684	0	0.0966387	0.217221	0.198276	0.0496032
1.15	0.153232	0.0454928	0.0561998	0.134378	0.0169082	0.0212766	0.0139335	0.0744289	0.14956	0.301053	0.0712166	0.0251451	0.0312094	0.0234375	0.0568562	0.0550775	0.0644678	0.158311	0.137333	0.0794824	0.0880361	0.121795	0.21576	0.103933	0.228963	0.295956	0.117845	0.145414	0.158385	0.0870712	0.370242	0.464286	0.0705882	0.0779537	0.0544503	0.080198	0.196702	0.0452055	0.284264	0.37037	0.246883	0.0736579	0.0862069	0.250513	0.264775	0.0483193	0.242661	0.109914	0.0357143
1.2	0.144453	0.0395956	0.0579839	0.134378	0.0120773	0.0106383	0.0150054	0.0714812	0.148583	0.321053	0.0563798	0.0174081	0.0377113	0.0256696	0.0401338	0.0447504	0.0509745	0.163588	0.14	0.0536044	0.13544	0.294872	0.242026	0.171348	0.250489	0.3125	0.225589	0.17226	0.21118	0.153034	0.366782	0.392857	0.0485294	0.0609013	0.0471204	0.0811881	0.1649	0.0246575	0.182741	0.251852	0.266833	0.0649189	0.127586	0.223819	0.263593	0.0546218	0.268102	0.146552	0.0357143
1.25	0.155626	0.0454928	0.0669045	0.146744	0.020934	0.00773694	0.0214362	0.0685335	0.162268	0.309474	0.103858	0.0464217	0.0559168	0.03125	0.0635452	0.0843373	0.0584708	0.21372	0.170667	0.0683919	0.133183	0.275641	0.230769	0.176966	0.260274	0.292279	0.20202	0.212528	0.245342	0.145119	0.32872	0.277778	0	0.0523752	0.0376963	0.070297	0.149588	0.0150685	0.126904	0.148148	0.259352	0.0549313	0.0827586	0.244353	0.300236	0.0483193	0.250489	0.12069	0.0357143
1.3	0.155626	0.0454928	0.0597681	0.141797	0.0144928	0.00773694	0.0192926	0.0633751	0.163245	0.295789	0.0652819	0.0232108	0.0429129	0.0301339	0.0518395	0.0516351	0.0509745	0.147757	0.149333	0.0591497	0.108352	0.336538	0.202627	0.143258	0.254403	0.299632	0.16835	0.187919	0.23913	0.137203	0.491349	0.309524	0.0294118	0.0657734	0.0335079	0.050495	0.166078	0.0465753	0.147208	0.192593	0.269327	0.031211	0.0793103	0.23614	0.293144	0.0357143	0.25636	0.12931	0.0376984
1.35	0.161213	0.0454928	0.0651204	0.154988	0.0144928	0.00676983	0.0246517	0.0567428	0.1652	0.298947	0.0356083	0.0174081	0.0364109	0.0212054	0.0367893	0.0447504	0.0329835	0.203166	0.174667	0.0351201	0.137698	0.285256	0.210131	0.162921	0.254403	0.299632	0.191919	0.199105	0.217391	0.113456	0.397924	0.281746	0.0529412	0.0706456	0.0544503	0.0663366	0.135453	0.0205479	0.172589	0.192593	0.261845	0.0436954	0.0862069	0.225873	0.295508	0.0483193	0.240705	0.133621	0.0357143
1.4	0.162809	0.0446504	0.0677966	0.152514	0.0128824	0.00967118	0.0471597	0.0560059	0.170088	0.317895	0	0	0	0	0	0	0.011994	0.16095	0.18	0	0.155756	0.355769	0.221388	0.182584	0.285714	0.318015	0.222222	0.228188	0.229814	0.197889	0.425606	0.31746	0.127941	0.0682095	0.0638743	0.0940594	0.149588	0.0424658	0.228426	0.288889	0.246883	0.011236	0.0862069	0.252567	0.280142	0.052521	0.252446	0.127155	0.0496032
1.45	0.173184	0.0446504	0.0633363	0.146744	0.00966184	0.0116054	0.0117899	0.0478998	0.167155	0.290526	0.0919881	0.0386847	0.0312094	0.0267857	0.0434783	0.0550775	0.0404798	0.182058	0.182667	0.0591497	0.151242	0.355769	0.227017	0.162921	0.272016	0.303309	0.208754	0.214765	0.232919	0.16095	0.3391	0.206349	0.297059	0.0328867	0.0115183	0.0475248	0.0977621	0.00547945	0.0253807	0.00740741	0.244389	0.0499376	0.0689655	0.225873	0.304965	0.0294118	0.248532	0.107759	0.047619
1.5	0.168396	0.0387532	0.0606601	0.146744	0.010467	0	0.022508	0.0434783	0.177908	0.28	0.0979228	0.0348162	0.0455137	0.03125	0.0585284	0.0378657	0.0449775	0.17942	0.186667	0.0554529	0.0970655	0.400641	0.170732	0.117978	0.258317	0.255515	0.195286	0.17226	0.192547	0.100264	0.456747	0.257937	0.317647	0.0609013	0.0230366	0.0465347	0.116608	0.0410959	0.142132	0.185185	0.234414	0.0461923	0.0344828	0.232033	0.29078	0.0294118	0.254403	0.125	0.0357143
1.55	0.175579	0.042123	0.0642284	0.153339	0.0128824	0.016441	0.0278671	0.0375829	0.173998	0.284211	0.0919881	0.040619	0.0442133	0.03125	0.0501672	0.0533563	0.023988	0.184697	0.186667	0.0369686	0.0902935	0.378205	0.193246	0.146067	0.240705	0.272059	0.161616	0.167785	0.214286	0.0870712	0.342561	0.194444	0.314706	0.0657734	0.0324607	0.0455446	0.110718	0.00547945	0.167513	0.177778	0.234414	0.0524345	0.0482759	0.234086	0.282506	0.0273109	0.240705	0.114224	0.0257937
1.6	0.172386	0.0429655	0.0686887	0.145095	0.00885668	0.0183752	0.0278671	0.0397937	0.176931	0.270526	0.103858	0.0386847	0.0650195	0.03125	0.0568562	0.0533563	0.0344828	0.189974	0.212	0.0499076	0.14447	0.355769	0.221388	0.213483	0.311155	0.213235	0.222222	0.234899	0.204969	0.113456	0.363322	0.218254	0.327941	0.0621194	0.0282723	0.0405941	0.0930506	0.0219178	0.116751	0.155556	0.241895	0.0387016	0.0517241	0.211499	0.289598	0.00630252	0.248532	0.12069	0.0257937
1.65	0.130088	0.131424	0.0847458	0.0577082	0.00885668	0.44971	0.137192	0.0316875	0.172043	0.277895	0.10089	0.0425532	0.046814	0.0290179	0.0518395	0.0464716	0.041979	0.163588	0.193333	0.0480591	0.148984	0.326923	0.221388	0.196629	0.324853	0.189338	0.245791	0.243848	0.214286	0.134565	0.363322	0.329365	0.305882	0.0535932	0.0293194	0.0386139	0.0848057	0.0342466	0.0964467	0.0296296	0.246883	0.0536829	0.0793103	0.223819	0.356974	0.0210084	0.242661	0.122845	0.0178571
1.7	0.0558659	0.127211	0.0909902	0.0906843	0.0120773	0.367505	0.24866	0.0198968	0.15738	0.238947	0.103858	0.032882	0.0637191	0.0323661	0.0451505	0.0361446	0.0374813	0.171504	0.206667	0.0536044	0.146727	0.214744	0.202627	0.202247	0.362035	0.161765	0.185185	0.268456	0.167702	0.118734	0.356401	0.31746	0.317647	0.0560292	0.0167539	0.0277228	0.0718492	0.0273973	0.101523	0.111111	0.256858	0.0349563	0.0896552	0.234086	0.270686	0.0294118	0.223092	0.125	0.0257937
1.75	0.0494812	0.132266	0.074041	0.0601814	0.0193237	0.398453	0.175777	0.0257922	0.167155	0.273684	0.0919881	0.0154739	0.0494148	0.0323661	0.0401338	0.0378657	0.00749625	0.153034	0.209333	0.025878	0.128668	0.259615	0.183865	0.188202	0.315068	0.161765	0.198653	0.225951	0.139752	0.0844327	0.235294	0.269841	0.294118	0.0487211	0	0.0108911	0.0765607	0.00136986	0.035533	0.00740741	0.229426	0.0574282	0.0310345	0.225873	0.282506	0.0441176	0.234834	0.118534	0.0456349
1.8	0.0343176	0.128054	0.0695807	0.0544106	0.00966184	0.38588	0.176849	0.0243183	0.159335	0.275789	0.074184	0.0290135	0.0507152	0.0245536	0.0301003	0.0361446	0.00449775	0.145119	0.196	0.0277264	0.142212	0.275641	0.20075	0.179775	0.322896	0.159926	0.164983	0.275168	0.15528	0.131926	0.269896	0.277778	0.269118	0.0304507	0.00732984	0.0257426	0.06596	0.0205479	0.0609137	0	0.239401	0.0574282	0.062069	0.275154	0.270686	0.0378151	0.250489	0.118534	0.0178571
1.85	0.0399042	0.143218	0.0722569	0.0502885	0.010467	0.397485	0.163987	0.0117907	0.160313	0.229474	0.11276	0.0270793	0.0572172	0.03125	0.048495	0.0516351	0.0164918	0.137203	0.198667	0.051756	0.119639	0.269231	0.196998	0.185393	0.356164	0.227941	0.188552	0.272931	0.127329	0.14248	0.283737	0.186508	0.286765	0.0487211	0.0052356	0.00990099	0.0624264	0.0219178	0.0609137	0.037037	0.214464	0.0611735	0.0655172	0.229979	0.27305	0.0252101	0.248532	0.118534	0.0238095
1.9	0.028731	0.15417	0.0802855	0.0560594	0.0177134	0.387814	0.184352	0.00884304	0.140762	0.229474	0.109792	0.0270793	0.0650195	0.0379464	0.0602007	0.0430293	0.0224888	0.14248	0.202667	0.0591497	0.124153	0.301282	0.166979	0.126404	0.272016	0.257353	0.171717	0.205817	0.127329	0.113456	0.249135	0.111111	0.283824	0.0609013	0.0198953	0.0178218	0.0459364	0.0315068	0.121827	0.103704	0.206983	0.0411985	0.0827586	0.238193	0.252955	0.0168067	0.254403	0.114224	0.031746
1.95	0.0295291	0.170177	0.0981267	0.0338005	0	0.402321	0.219721	0	0.155425	0.204211	0.11276	0.0193424	0.0572172	0.0301339	0.0434783	0.0258176	0.017991	0.118734	0.216	0.038817	0.124153	0.266026	0.180113	0.143258	0.27593	0.310662	0.161616	0.194631	0.192547	0.158311	0.245675	0.0912698	0.308824	0.0523752	0.0209424	0.0227723	0.041225	0.039726	0.167513	0.162963	0.187032	0.0486891	0.037931	0.199179	0.230496	0.012605	0.203523	0.116379	0.0555556
2	0.00159617	0.174389	0.0785013	0.0296785	0.00966184	0.327853	0.228296	0.00294768	0.117302	0.267368	0.121662	0.0290135	0.0897269	0.0625	0.0351171	0.0361446	0.0434783	0.271768	0.305333	0.0720887	0.0993228	0.378205	0.0281426	0	0	0.154412	0.111111	0	0.220497	0.0369393	0.217993	0.0833333	0.273529	0.0523752	0.0303665	0.0485149	0.0376914	0.0273973	0.0964467	0.162963	0.201995	0.171036	0.062069	0.373717	0.481087	0.0903361	0.207436	0	0.0615079
2.05	0	0.192081	0.0802855	0.104699	0.0305958	0.320116	0.241158	0.0331614	0.166178	0.294737	0.109792	0.0386847	0.0585176	0.0267857	0.0501672	0.0395869	0.0329835	0.0712401	0.150667	0.0554529	0.167043	0.365385	0.217636	0.19382	0.354207	0.209559	0.218855	0.243848	0.192547	0.168865	0.141869	0	0.301471	0.0657734	0.0146597	0	0.0424028	0.0260274	0	0.2	0.21197	0.142322	0	0.318275	0.185579	0.00210084	0.156556	0.150862	0
2.1	0.0159617	0.235046	0.0642284	0.180544	0.0966184	0.424565	0.19507	0.0213707	0.191593	0.250526	0.106825	0.032882	0.046814	0.0390625	0.0518395	0.0395869	0.0269865	0.14248	0.186667	0.0277264	0.234763	0.365385	0.318949	0.261236	0.381605	0.207721	0.215488	0.331096	0.273292	0.211082	0.228374	0.543651	0.247059	0.0316687	0.0942408	0.0534653	0.0742049	0.0534247	0.101523	0.177778	0	0.0362047	0.0310345	0	0.0520095	0.0756303	0.00587084	0.0323276	0.154762
2.15	0.0351157	0.280539	0.107939	0.226711	0.146538	0.475822	0.151125	0.0169492	0.173021	0.258947	0.121662	0.0367505	0.0507152	0.03125	0.0652174	0.0533563	0.0149925	0.155673	0.209333	0.0351201	0.180587	0.291667	0.283302	0.247191	0.399217	0.180147	0.16835	0.281879	0.198758	0.153034	0.439446	1.2619	0.25	0.0487211	0.0973822	0.139604	0.0636042	0.0821918	0.208122	0.222222	0.00249377	0.00873908	0.0655172	0.063655	0.0401891	0.0819328	0	0.0172414	0.154762
2.2	0.0718276	0.276327	0.115076	0.208574	0.132045	0.467118	0.166131	0.0191599	0.178886	0.269474	0.115727	0.0348162	0.0481144	0.0412946	0.0585284	0.0585198	0.0164918	0.118734	0.192	0.0462107	0.207675	0.352564	0.440901	0.353933	0.465753	0.213235	0.212121	0.317673	0.254658	0.21372	0.588235	1.82143	0.261765	0.0864799	0.0712042	0.185149	0.0800942	0.0835616	0.263959	0.214815	0.0299252	0	0.103448	0.12731	0.0224586	0.168067	0.0195695	0.0668103	0.152778
2.25	0.0909816	0.294861	0.111508	0.230008	0.163446	0.5706	0.227224	0.018423	0.187683	0.252632	0.103858	0.032882	0.0403121	0.0301339	0.0451505	0.0378657	0.0149925	0.0976253	0.176	0.0277264	0.275395	0.36859	0.645403	0.466292	0.579256	0.213235	0.212121	0.342282	0.295031	0.245383	0.813149	2.23016	0.220588	0.143727	0.0649215	0.172277	0.0624264	0.0465753	0.365482	0.266667	0.311721	0.197253	0.231034	0.201232	0.270686	0.302521	0.410959	0.398707	0.0992063
2.3	0.174781	0.31171	0.117752	0.225886	0.169082	0.795938	0.266881	0.0117907	0.168133	0.249474	0.106825	0.0309478	0.0416125	0.0401786	0.0501672	0.0413081	0.0194903	0.168865	0.196	0.025878	0.31377	0.349359	1.11069	0.544944	0.735812	0.226103	0.255892	0.389262	0.338509	0.261214	0.934256	2.47222	0.232353	0.244823	0.0921466	0.20297	0.104829	0.0383562	0.401015	0.274074	0.471322	0.197253	0.289655	0.492813	0.51773	0.359244	0.606654	0.528017	0.0952381
2.35	0.205906	0.343724	0.122212	0.236603	0.180354	0.87234	0.285102	0.0140015	0.179863	0.233684	0.0860534	0.0367505	0.0520156	0.0379464	0.0551839	0.0309811	0.0089955	0.195251	0.222667	0.0277264	0.38149	0.416667	1.27767	0.595506	0.898239	0.229779	0.313131	0.400447	0.375776	0.298153	1.16609	2.56349	0.238235	0.294762	0.129843	0.20297	0.0624264	0.0753425	0.365482	0.288889	0.586035	0.330836	0.286207	0.63655	0.579196	0.42437	0.669276	0.614224	0.111111
2.4	0.233839	0.329402	0.115076	0.242374	0.187601	0.976789	0.310825	0.0213707	0.174976	0.255789	0.106825	0.0348162	0.0572172	0.03125	0.0585284	0.0481928	0.00149925	0.348285	0.288	0.0147874	0.417607	0.435897	1.33583	0.643258	1.0274	0.240809	0.380471	0.469799	0.42236	0.313984	1.6436	2.89683	0.285294	0.371498	0.174869	0.219802	0.11543	0.156164	0.563452	0.666667	0.65586	0.503121	0.368966	0.704312	0.599291	0.563025	0.692759	0.644397	0.144841
2.45	0.272147	0.327717	0.12132	0.242374	0.181159	1.00097	0.303323	0.036846	0.206256	0.275789	0.0682493	0.0232108	0.0338101	0.03125	0.048495	0.0447504	0.0134933	0.372032	0.265333	0.025878	0.446953	0.525641	1.37711	0.710674	1.09589	0.262868	0.414141	0.494407	0.462733	0.335092	1.9654	2.73413	0.320588	0.337393	0.162304	0.194059	0.154299	0.172603	0.431472	0.607407	0.713217	0.554307	0.482759	0.759754	0.601655	0.668067	0.688845	0.69181	0.144841
2.5	0.26257	0.331087	0.117752	0.242374	0.196457	0.992263	0.292605	0.0309506	0.184751	0.251579	0.10089	0.0464217	0.0507152	0.0491071	0.0568562	0.0567986	0.0149925	0.430079	0.268	0.0351201	0.467269	0.583333	1.41839	0.710674	1.17613	0.25	0.454545	0.530201	0.450311	0.343008	2.30796	2.8373	0.319118	0.356882	0.160209	0.222772	0.312132	0.217808	0.588832	0.762963	0.812968	0.59176	0.644828	0.74538	0.680851	0.762605	0.710372	0.717672	0.188492
2.55	0.27933	0.328559	0.114184	0.239077	0.193237	1.0029	0.271168	0.0626382	0.210166	0.28	0.10089	0.0483559	0.0507152	0.0591518	0.0819398	0.0688468	0.0254873	0.414248	0.262667	0.0462107	0.419865	0.580128	1.39024	0.66573	1.16634	0.231618	0.491582	0.52349	0.465839	0.313984	2.36332	2.65873	0.320588	0.3581	0.202094	0.250495	0.341578	0.238356	0.705584	0.888889	0.910224	0.655431	0.793103	0.679671	0.652482	0.836134	0.731898	0.739224	0.18254
2.6	0.268156	0.326032	0.110616	0.237428	0.189211	0.994197	0.282958	0.11717	0.281525	0.281053	0.0682493	0.032882	0.0546164	0.0736607	0.0535117	0.0533563	0.00449775	0.472296	0.313333	0.0184843	0.58465	0.785256	1.5666	0.789326	1.25245	0.308824	0.683502	0.655481	0.571429	0.469657	2.45675	2.61111	0.282353	0.371498	0.239791	0.277228	0.371025	0.272603	0.80203	0.903704	0.975062	0.646692	0.824138	0.712526	0.631206	0.865546	0.761252	0.780172	0.210317
2.65	0.27933	0.331929	0.107939	0.234955	0.186795	1.00677	0.273312	0.171702	0.324536	0.324211	0.0979228	0.117988	0.0611183	0.121652	0.0735786	0.0619621	0.0089955	0.490765	0.349333	0.0425139	0.553047	0.753205	1.52158	0.786517	1.22701	0.28125	0.754209	0.653244	0.565217	0.430079	2.46713	2.52381	0.348529	0.375152	0.284817	0.30495	0.39576	0.256164	1.09645	1.05926	1.00499	0.617978	0.82069	0.794661	0.621749	0.87395	0.767123	0.80819	0.204365
2.7	0.272147	0.332772	0.107047	0.230833	0.181159	0.998066	0.276527	0.204864	0.349951	0.346316	0.0919881	0.0696325	0.0624187	0.19308	0.0535117	0.0499139	0.0029985	0.485488	0.358667	0.025878	0.609481	0.839744	1.53096	0.808989	1.25636	0.28125	0.808081	0.682327	0.57764	0.459103	2.29758	2.33333	0.451471	0.400731	0.305759	0.350495	0.363958	0.275342	1.37056	1.32593	1.00499	0.596754	0.851724	0.815195	0.638298	0.884454	0.782779	0.801724	0.210317
2.75	0.284916	0.340354	0.102587	0.224237	0.178744	1.00097	0.265809	0.235814	0.362659	0.396842	0.0949555	0.218569	0.0676203	0.323661	0.0685619	0.0567986	0.005997	0.496042	0.356	0.0240296	0.643341	0.929487	1.57411	0.876404	1.32485	0.264706	0.828283	0.695749	0.599379	0.546174	2.00346	2.07937	0.435294	0.425091	0.312042	0.318812	0.382803	0.235616	1.43655	1.42963	1.03242	0.564295	0.851724	0.907598	0.664303	0.87395	0.823875	0.81681	0.240079
2.8	0.27933	0.336142	0.101695	0.238252	0.18438	0.989362	0.274384	0.271186	0.386119	0.446316	0.103858	0.32882	0.0845254	0.46875	0.0785953	0.0585198	0	0.509235	0.365333	0.025878	0.677201	0.942308	1.57598	0.946629	1.33268	0.251838	0.888889	0.711409	0.555901	0.572559	2.08651	2.18651	0.448529	0.477467	0.365445	0.359406	0.420495	0.241096	1.67513	1.74815	1.02244	0.535581	0.896552	0.837782	0.702128	0.852941	0.800391	0.823276	0.218254
2.85	0.284118	0.342039	0.103479	0.242374	0.18599	0.989362	0.275456	0.309506	0.394917	0.548421	0.121662	0.441006	0.111834	0.544643	0.0735786	0.0585198	0.0134933	0.488127	0.346667	0.0314233	0.704289	0.961538	1.60788	0.938202	1.34834	0.286765	0.912458	0.729306	0.624224	0.596306	2.13495	2.11508	0.383824	0.433618	0.331937	0.328713	0.367491	0.227397	1.65482	1.74074	1.04239	0.553059	0.934483	0.880903	0.680851	0.855042	0.829746	0.834052	0.25
2.9	0.291301	0.335299	0.0990187	0.232481	0.179549	1.0029	0.256163	0.337509	0.403715	0.558947	0.124629	0.529981	0.115735	0.570312	0.0719064	0.0567986	0.017991	0.530343	0.361333	0.025878	0.742664	0.923077	1.56285	0.957865	1.33855	0.284926	0.989899	0.711409	0.645963	0.622691	2.20761	2.13492	0.402941	0.445798	0.335079	0.318812	0.409894	0.234247	1.7868	1.85185	1.00499	0.534332	0.9	0.911704	0.704492	0.815126	0.812133	0.823276	0.234127
2.95	0.27933	0.329402	0.0927743	0.228359	0.175523	0.968085	0.241158	0.386883	0.422287	0.577895	0.124629	0.524178	0.106632	0.579241	0.0568562	0.0499139	0.0194903	0.519789	0.357333	0.0221811	0.776524	1.07372	1.62852	1.01966	1.32485	0.323529	1.10101	0.751678	0.745342	0.654354	2.10727	2.02381	0.448529	0.451888	0.321466	0.305941	0.444052	0.230137	1.82741	1.98519	0.992519	0.524345	0.882759	0.868583	0.691489	0.792017	0.812133	0.877155	0.269841
3	0.280128	0.340354	0.0945584	0.232481	0.176329	0.975822	0.251876	0.474576	0.470186	0.625263	0.124629	0.551257	0.148244	0.581473	0.0735786	0.0516351	0.0254873	0.51715	0.36	0.0203327	0.756208	1	1.58161	1.04494	1.36791	0.332721	1.18519	0.756152	0.670807	0.659631	2.11073	2.03175	0.407353	0.447016	0.335079	0.30297	0.415783	0.239726	1.83756	1.92593	1	0.503121	0.937931	0.913758	0.699764	0.80042	0.819961	0.898707	0.285714
3.05	0.282522	0.338669	0.0954505	0.234955	0.180354	0.971954	0.251876	0.535741	0.509286	0.626316	0.121662	0.545455	0.139142	0.574777	0.0635452	0.0533563	0.0434783	0.530343	0.36	0.0147874	0.810384	0.967949	1.65666	1.09831	1.35029	0.330882	1.27946	0.767338	0.695652	0.744063	2.14533	1.97222	0.385294	0.443362	0.336126	0.305941	0.601885	0.542466	1.95431	2.2	1.05486	0.508115	0.931034	0.899384	0.725768	0.85084	0.81409	0.883621	0.281746
3.1	0.284916	0.343724	0.0900981	0.225062	0.171498	0.964217	0.245445	0.572587	0.497556	0.638947	0.139466	0.568665	0.153446	0.594866	0.083612	0.0671256	0.0569715	0.567282	0.376	0.0295749	0.828442	1.00962	1.62852	1.10955	1.33659	0.369485	1.29966	0.782998	0.692547	0.754617	2.20415	1.99206	0.358824	0.43849	0.353927	0.315842	0.459364	0.350685	1.96954	2.01481	1.04239	0.499376	0.941379	0.926078	0.716312	0.852941	0.810176	0.900862	0.321429
3.15	0.292897	0.342039	0.088314	0.231657	0.169887	0.972921	0.251876	0.597642	0.549365	0.652632	0.130564	0.562863	0.157347	0.581473	0.0785953	0.0516351	0.071964	0.564644	0.365333	0.0369686	0.89842	1.04808	1.65666	1.15169	1.33855	0.417279	1.34007	0.796421	0.767081	0.783641	2.12111	1.90079	0.417647	0.455542	0.35288	0.30198	0.46172	0.320548	1.99492	2.14815	1.0399	0.479401	0.924138	0.874743	0.683215	0.882353	0.804305	0.875	0.315476
3.2	0.292099	0.353833	0.0820696	0.219291	0.164251	0.966151	0.242229	0.630066	0.588465	0.646316	0.139466	0.558994	0.170351	0.592634	0.0668896	0.0619621	0.095952	0.514512	0.348	0.0277264	0.900677	1.01282	1.69043	1.17135	1.36791	0.441176	1.44444	0.816555	0.757764	0.762533	2.11073	1.97619	0.375	0.440926	0.347644	0.309901	0.468787	0.29863	2.07614	2.11111	1.06234	0.490637	0.934483	0.831622	0.677305	0.890756	0.806262	0.924569	0.345238
3.25	0.293695	0.336984	0.0802855	0.210223	0.168277	0.954545	0.240086	0.640383	0.577713	0.650526	0.127596	0.558994	0.214564	0.58817	0.090301	0.0619621	0.095952	0.51715	0.36	0.0203327	0.927765	1.02564	1.66041	1.17978	1.36399	0.488971	1.40741	0.818792	0.810559	0.846966	2.15917	1.97619	0.313235	0.422655	0.357068	0.317822	0.457008	0.286301	2.08122	2.18519	1.05486	0.486891	0.937931	0.790554	0.608747	0.892857	0.772994	0.922414	0.349206
3.3	0.286512	0.339511	0.0793934	0.21352	0.162641	0.96325	0.220793	0.674282	0.619746	0.673684	0.136499	0.566731	0.279584	0.59933	0.0852843	0.0533563	0.118441	0.51715	0.342667	0.0351201	0.927765	1.04487	1.69981	1.16011	1.35812	0.533088	1.47475	0.809843	0.801242	0.862797	2.04844	1.77778	0.288235	0.404385	0.304712	0.266337	0.448763	0.238356	1.9797	2.14815	1.08479	0.494382	0.910345	0.755647	0.555556	0.939076	0.771037	0.918103	0.357143
3.35	0.288109	0.347936	0.0758252	0.204452	0.161836	0.953578	0.228296	0.690494	0.679374	0.668421	0.139466	0.562863	0.335501	0.58817	0.0936455	0.0688468	0.112444	0.509235	0.353333	0.0203327	0.96614	1.02244	1.68105	1.19944	1.35029	0.584559	1.48822	0.812081	0.798137	0.825858	2.11419	1.90873	0.351471	0.439708	0.335079	0.29505	0.436985	0.238356	2.04569	2.18519	1.08728	0.48814	0.931034	0.696099	0.476359	0.89916	0.767123	0.928879	0.365079
3.4	0.291301	0.345409	0.0758252	0.215993	0.161031	0.970019	0.234727	0.707443	0.705767	0.68	0.121662	0.558994	0.370611	0.612723	0.123746	0.0740103	0.109445	0.532982	0.357333	0.0351201	0.975169	1.03205	1.70169	1.20225	1.36595	0.659926	1.45118	0.809843	0.850932	0.83905	2.10381	1.95238	0.338235	0.428745	0.327749	0.290099	0.42874	0.260274	2.00508	2.18519	1.05237	0.518102	1	0.650924	0.429078	0.947479	0.778865	0.924569	0.390873
3.45	0.288907	0.335299	0.0677966	0.20033	0.15781	0.976789	0.221865	0.71776	0.713587	0.678947	0.145401	0.558994	0.375813	0.613839	0.162207	0.0929432	0.115442	0.527704	0.350667	0.0720887	0.981941	1.01603	1.70732	1.22191	1.33464	0.716912	1.52189	0.825503	0.919255	0.862797	2.04844	1.80556	0.344118	0.416565	0.315183	0.284158	0.374558	0.231507	2.01523	2.15556	1.07731	0.52809	0.986207	0.577002	0.371158	1.0021	0.800391	0.93319	0.418651
3.5	0.282522	0.334457	0.0686887	0.197857	0.157005	0.96325	0.224009	0.721444	0.746823	0.68	0.160237	0.586074	0.410923	0.601562	0.214047	0.106713	0.125937	0.53562	0.361333	0.136784	0.988713	1.0609	1.69794	1.20506	1.34442	0.814338	1.49832	0.847875	0.959627	0.868074	2.17301	1.84127	0.264706	0.348356	0.317277	0.315842	0.351001	0.257534	2	1.96296	1.05736	0.563046	1.0069	0.50308	0.335697	0.993697	0.831703	0.935345	0.424603
3.55	0.298484	0.358888	0.0802855	0.203627	0.164251	0.983559	0.217578	0.753132	0.810362	0.690526	0.172107	0.560928	0.392718	0.600446	0.254181	0.106713	0.115442	0.51715	0.357333	0.138632	0.984199	0.977564	1.69981	1.27528	1.36595	0.832721	1.52525	0.812081	0.928571	0.828496	2.13841	1.86905	0.358824	0.412911	0.321466	0.285149	0.361602	0.241096	2.07107	2.14815	1.04489	0.55181	1.00345	0.470226	0.312057	1.0021	0.804305	0.918103	0.40873
3.6	0.286512	0.329402	0.0624442	0.19291	0.151369	0.961315	0.200429	0.733235	0.816227	0.669474	0.163205	0.568665	0.409623	0.604911	0.264214	0.127367	0.122939	0.480211	0.344	0.151571	1.02709	1.08974	1.75235	1.27247	1.37182	0.966912	1.58249	0.852349	1.00621	0.891821	2.00346	1.76984	0.304412	0.408039	0.299476	0.265347	0.372203	0.212329	2.0203	2.21481	1.05486	0.610487	1.03448	0.49076	0.333333	1.01261	0.823875	0.93319	0.472222
3.65	0.256983	0.313395	0.0535236	0.174773	0.141707	0.948743	0.209003	0.725866	0.806452	0.668421	0.225519	0.578337	0.417425	0.632812	0.294314	0.218589	0.11994	0.496042	0.341333	0.158965	0.981941	1.01603	1.6773	1.26124	1.34834	0.985294	1.52862	0.82774	0.956522	0.846966	2.01384	1.80159	0.282353	0.416565	0.299476	0.269307	0.301531	0.20274	1.92893	2.15556	1.04988	0.579276	0.968966	0.4846	0.362884	0.997899	0.827789	0.909483	0.416667
3.7	0.276137	0.330244	0.0597681	0.184666	0.148953	0.960348	0.20686	0.728814	0.797654	0.668421	0.308605	0.59381	0.46554	0.640625	0.317726	0.345955	0.115442	0.496042	0.350667	0.171904	1.05418	1.07372	1.70169	1.35955	1.34834	1.05147	1.51515	0.836689	1.00621	0.897098	1.9654	1.73016	0.283824	0.409257	0.270157	0.236634	0.308598	0.191781	1.89848	2.02222	1.02244	0.596754	0.934483	0.552361	0.398345	0.989496	0.823875	0.898707	0.43254
3.75	0.26257	0.31845	0.0535236	0.170651	0.138486	0.961315	0.204716	0.733235	0.807429	0.654737	0.424332	0.599613	0.473342	0.655134	0.341137	0.437177	0.121439	0.493404	0.345333	0.171904	1.03612	1.0641	1.67542	1.41573	1.35812	1.08272	1.58586	0.82774	0.987578	0.986807	2.02422	1.79365	0.316176	0.442144	0.303665	0.270297	0.268551	0.2	1.94416	2.07407	1.00748	0.601748	0.92069	0.560575	0.43617	0.983193	0.825832	0.922414	0.426587
3.8	0.259377	0.310025	0.0544157	0.170651	0.140097	0.955513	0.200429	0.733235	0.829912	0.645263	0.448071	0.60735	0.447334	0.668527	0.344482	0.462995	0.104948	0.488127	0.341333	0.147874	1.02935	1.02885	1.68105	1.41292	1.34051	1.07721	1.51178	0.821029	0.959627	0.92876	1.91696	1.71032	0.276471	0.429963	0.280628	0.243564	0.260306	0.184932	1.88325	1.92593	1.00249	0.635456	0.868966	0.589322	0.498818	0.936975	0.841487	0.894397	0.416667
3.85	0.257781	0.302443	0.0517395	0.165705	0.137681	0.972921	0.196141	0.71776	0.782014	0.630526	0.522255	0.603482	0.457737	0.703125	0.344482	0.500861	0.134933	0.44591	0.324	0.182994	1.01129	1.04487	1.64916	1.50843	1.35421	1.13419	1.52525	0.814318	0.987578	0.949868	1.93772	1.71032	0.275	0.405603	0.290052	0.242574	0.250883	0.194521	1.92386	1.99259	0.987531	0.625468	0.903448	0.63039	0.498818	0.926471	0.845401	0.894397	0.43254
3.9	0.259377	0.288964	0.043711	0.153339	0.128019	0.94294	0.203644	0.723655	0.827957	0.610526	0.605341	0.609284	0.485046	0.702009	0.371237	0.526678	0.125937	0.490765	0.346667	0.158965	1.0316	1.08974	1.63602	1.50562	1.35616	1.18934	1.56902	0.816555	0.981366	0.897098	1.92734	1.6746	0.280882	0.398295	0.274346	0.244554	0.233216	0.180822	1.84264	1.88889	0.990025	0.615481	0.9	0.552361	0.463357	0.918067	0.851272	0.881466	0.402778
3.95	0.359138	0.326874	0.0758252	0.140148	0.111111	0.555126	0.258307	0.7465	0.87781	0.605263	0.593472	0.611219	0.475943	0.702009	0.459866	0.535284	0.118441	0.51715	0.381333	0.162662	0.96614	0.980769	1.60788	1.50281	1.33659	1.17463	1.50505	0.782998	0.900621	0.886544	1.89965	1.65476	0.301471	0.412911	0.281675	0.241584	0.233216	0.180822	1.84264	1.94815	0.773067	0.486891	1.11379	0.462012	0.567376	0.997899	0.931507	0.974138	0.43254
4	0.260176	0.284751	0.0535236	0.158285	0.136071	0.918762	0.211147	0.93073	1.03617	1.11684	0.614243	0.632495	0.547464	0.765625	0.458194	0.528399	0.128936	1.06069	0.730667	0.18854	0.911964	0.996795	1.58537	1.58708	1.39922	1.22426	1.52862	0.825503	0.869565	0.939314	1.9654	1.68651	0.267647	0.393423	0.256545	0.242574	0.234393	0.19589	1.79695	1.88889	0.910224	0.722846	0.841379	0.457906	0.378251	0.957983	0.829746	0.862069	0.392857
4.05	0.39585	0.304128	0.0499554	0.153339	0.13285	0.941006	0.209003	0.857775	0.83089	0.872632	0.611276	0.636364	0.496749	0.714286	0.444816	0.583477	0.13943	0.277045	0.249333	0.177449	1.05643	1.12179	1.63602	1.62079	1.35225	1.2114	1.50505	0.861298	1.00932	1.02375	1.82699	1.61111	0.242647	0.389769	0.255497	0.226733	0.239105	0.171233	1.81726	1.91111	0.885287	0.659176	0.796552	0.498973	0.391253	0.920168	0.816047	0.87931	0.40873
4.1	0.383081	0.291491	0.0561998	0.152514	0.128824	0.921663	0.227224	0.839352	0.773216	0.786316	0.614243	0.642166	0.485046	0.723214	0.531773	0.612737	0.124438	0.208443	0.202667	0.170055	1.00226	1.03205	1.56473	1.60955	1.36595	1.15809	1.46128	0.816555	0.978261	0.907652	1.83045	1.57143	0.223529	0.383678	0.260733	0.224752	0.229682	0.169863	1.73604	1.67407	0.870324	0.601748	0.737931	0.5154	0.437352	0.855042	0.784736	0.818966	0.410714
4.15	0.276935	0.243471	0.0597681	0.15169	0.118357	0.902321	0.219721	0.887988	0.823069	0.910526	0.617211	0.644101	0.505852	0.727679	0.588629	0.612737	0.118441	0.313984	0.277333	0.166359	1.12867	1.18269	1.63415	1.63483	1.37182	1.18934	1.64646	0.928412	1.05901	1.05805	1.79585	1.60714	0.238235	0.372716	0.233508	0.208911	0.212014	0.160274	1.71574	1.80741	0.855362	0.590512	0.706897	0.564682	0.447991	0.808824	0.780822	0.797414	0.446429
4.2	0.249002	0.228307	0.0561998	0.147568	0.116747	0.871373	0.217578	0.862933	0.783969	0.801053	0.623145	0.669246	0.517555	0.725446	0.590301	0.623064	0.121439	0.218997	0.189333	0.166359	1.01129	1.10256	1.51407	1.5618	1.32485	1.11765	1.55892	0.847875	0.987578	0.984169	1.72318	1.59127	0.263235	0.371498	0.235602	0.228713	0.220259	0.173973	1.69543	1.71111	0.857855	0.569288	0.686207	0.566735	0.475177	0.762605	0.765166	0.803879	0.450397
4.25	0.219473	0.213985	0.0508475	0.137675	0.105475	0.830754	0.201501	0.845247	0.791789	0.789474	0.655786	0.678917	0.490247	0.729911	0.62709	0.664372	0.152924	0.216359	0.186667	0.186691	1.00451	1.08013	1.48405	1.57584	1.32094	1.11029	1.52189	0.829978	0.959627	0.970976	1.71972	1.58333	0.276471	0.37028	0.238743	0.220792	0.243816	0.183562	1.73604	1.74074	0.840399	0.545568	0.7	0.562628	0.468085	0.735294	0.774951	0.773707	0.43254
4.3	0.221868	0.21567	0.0517395	0.139324	0.111111	0.79207	0.216506	0.85409	0.777126	0.792632	0.664688	0.705996	0.53316	0.737723	0.647157	0.678141	0.133433	0.237467	0.186667	0.171904	1.01354	1.08333	1.47842	1.58427	1.31311	1.11397	1.53872	0.809843	0.975155	0.997361	1.71626	1.54762	0.236765	0.359318	0.240838	0.219802	0.229682	0.156164	1.68528	1.68889	0.850374	0.499376	0.693103	0.542094	0.451537	0.72479	0.745597	0.756466	0.434524
4.35	0.213089	0.2123	0.0526316	0.128607	0.109501	0.77853	0.235798	0.86367	0.801564	0.761053	0.649852	0.678917	0.514954	0.708705	0.615385	0.643718	0.124438	0.197889	0.18	0.166359	1.02709	1.12821	1.4878	1.58989	1.33268	1.12316	1.50505	0.825503	0.947205	1.02111	1.58824	1.42857	0.297059	0.3581	0.217801	0.19703	0.222615	0.146575	1.63452	1.64444	0.812968	0.560549	0.7	0.574949	0.459811	0.733193	0.774951	0.765086	0.488095
4.4	0.197127	0.199663	0.0454951	0.121187	0.10306	0.748549	0.224009	0.884304	0.819159	0.790526	0.652819	0.746615	0.491547	0.676339	0.617057	0.655766	0.0764618	0.269129	0.205333	0.120148	0.984199	1.11218	1.46341	1.52528	1.29354	1.14154	1.44781	0.774049	0.92236	1.01847	1.69896	1.53571	0.3	0.348356	0.228272	0.228713	0.260306	0.175342	1.70051	1.77037	0.810474	0.536829	0.665517	0.554415	0.455083	0.712185	0.755382	0.75	0.446429
4.45	0.197127	0.204718	0.0508475	0.115416	0.0982287	0.752418	0.217578	0.848931	0.778104	0.732632	0.64095	0.682785	0.49935	0.702009	0.633779	0.645439	0.133433	0.216359	0.184	0.166359	0.995485	1.11218	1.45779	1.51404	1.2955	1.16176	1.44781	0.823266	0.934783	1.04222	1.68858	1.54365	0.267647	0.361754	0.239791	0.224752	0.28033	0.171233	1.77665	1.86667	0.812968	0.535581	0.637931	0.577002	0.452719	0.720588	0.74364	0.728448	0.440476
4.5	0.177973	0.192081	0.0419269	0.107997	0.0837359	0.725338	0.204716	0.862196	0.798631	0.767368	0.626113	0.680851	0.492848	0.68192	0.630435	0.636833	0.130435	0.211082	0.177333	0.173752	0.993228	1.16026	1.4334	1.50281	1.28571	1.20221	1.52525	0.807606	0.965839	1.00528	1.55709	1.48413	0.192647	0.323995	0.2	0.205941	0.241461	0.154795	1.54822	1.67407	0.798005	0.524345	0.627586	0.550308	0.463357	0.682773	0.759295	0.730603	0.414683
4.55	0.186752	0.192081	0.0454951	0.105523	0.0797101	0.725338	0.219721	0.868091	0.837732	0.774737	0.655786	0.686654	0.501951	0.691964	0.675585	0.648881	0.127436	0.203166	0.172	0.16451	1.01354	1.17949	1.47842	1.52247	1.28571	1.2261	1.53199	0.821029	0.987578	1.05277	1.42907	1.40476	0.173529	0.310597	0.2	0.178218	0.261484	0.127397	1.56853	1.73333	0.815461	0.54432	0.568966	0.505133	0.476359	0.693277	0.765166	0.730603	0.420635
4.6	0.181963	0.190396	0.044603	0.102226	0.0764895	0.723404	0.209003	0.879145	0.802542	0.769474	0.637982	0.686654	0.508453	0.69308	0.632107	0.657487	0.130435	0.203166	0.185333	0.171904	0.977427	1.08333	1.4015	1.49438	1.26614	1.19301	1.48485	0.807606	0.944099	0.986807	1.50519	1.47619	0.216176	0.328867	0.211518	0.212871	0.277974	0.146575	1.69036	1.8	0.812968	0.549313	0.562069	0.50308	0.439716	0.693277	0.751468	0.730603	0.418651
4.65	0.176377	0.190396	0.0419269	0.0997527	0.0748792	0.712766	0.214362	0.870302	0.829912	0.764211	0.646884	0.673114	0.514954	0.68192	0.66388	0.660929	0.116942	0.224274	0.188	0.160813	0.988713	1.11218	1.41651	1.50281	1.27006	1.19669	1.43771	0.82774	0.944099	1.06596	1.52595	1.4246	0.219118	0.319123	0.202094	0.19901	0.270907	0.146575	1.61421	1.68889	0.800499	0.454432	0.558621	0.486653	0.43026	0.640756	0.749511	0.711207	0.430556
4.7	0.173184	0.198821	0.0392507	0.0997527	0.0821256	0.704062	0.21865	0.877671	0.824047	0.784211	0.700297	0.70793	0.543563	0.700893	0.697324	0.685026	0.143928	0.200528	0.182667	0.184843	0.96614	1.13782	1.39024	1.46348	1.2544	1.19669	1.51178	0.791946	0.944099	1.04222	1.49135	1.47222	0.247059	0.320341	0.183246	0.20297	0.253239	0.138356	1.58883	1.64444	0.795511	0.54432	0.486207	0.49692	0.43026	0.655462	0.74364	0.709052	0.412698
4.75	0.1668	0.186184	0.0365745	0.0898599	0.0724638	0.689555	0.204716	0.885777	0.84262	0.766316	0.667656	0.68472	0.516255	0.676339	0.668896	0.678141	0.124438	0.182058	0.182667	0.175601	0.968397	1.11218	1.36585	1.43539	1.24462	1.21691	1.46801	0.787472	0.953416	1.02639	1.53287	1.39286	0.294118	0.333739	0.203141	0.19703	0.265018	0.145205	1.60914	1.71852	0.773067	0.55181	0.486207	0.4846	0.425532	0.661765	0.757339	0.696121	0.46627
4.8	0.162011	0.171862	0.0338983	0.0890354	0.0636071	0.67795	0.198285	0.857775	0.815249	0.746316	0.682493	0.667311	0.538362	0.720982	0.665552	0.672978	0.136432	0.163588	0.152	0.197782	0.968397	1.07372	1.34334	1.46067	1.23875	1.17463	1.44781	0.812081	0.928571	1.06069	1.49135	1.41667	0.264706	0.319123	0.203141	0.20396	0.282686	0.149315	1.62437	1.82222	0.810474	0.515605	0.541379	0.50308	0.427896	0.682773	0.755382	0.724138	0.454365
4.85	0.176377	0.191238	0.0454951	0.0915087	0.0748792	0.681818	0.216506	0.887988	0.840665	0.776842	0.664688	0.680851	0.538362	0.676339	0.675585	0.683305	0.122939	0.203166	0.181333	0.179298	0.943567	1.06731	1.30769	1.44944	1.20744	1.14338	1.45791	0.778523	0.962733	1.01847	1.51211	1.42857	0.226471	0.314251	0.206283	0.19802	0.285041	0.139726	1.64467	1.82222	0.780549	0.51186	0.510345	0.4846	0.431442	0.617647	0.747554	0.711207	0.440476
4.9	0.161213	0.171862	0.0410348	0.0865622	0.0668277	0.646035	0.205788	0.885041	0.835777	0.755789	0.643917	0.680851	0.50065	0.68192	0.670569	0.650602	0.109445	0.192612	0.18	0.175601	0.963883	1.00641	1.2364	1.41854	1.21331	1.14338	1.40067	0.789709	0.900621	1.02639	1.46367	1.5	0.180882	0.305725	0.196859	0.209901	0.268551	0.131507	1.60914	1.76296	0.78803	0.525593	0.5	0.486653	0.447991	0.634454	0.749511	0.706897	0.444444
4.95	0.157223	0.175232	0.0410348	0.084089	0.0700483	0.617988	0.205788	0.872513	0.829912	0.762105	0.649852	0.651838	0.498049	0.670759	0.655518	0.650602	0.104948	0.187335	0.181333	0.171904	0.984199	1.07051	1.29268	1.4382	1.22701	1.18199	1.48822	0.794183	0.931677	1.09763	1.391	1.35317	0.213235	0.303289	0.172775	0.190099	0.267373	0.128767	1.54822	1.67407	0.76808	0.521848	0.503448	0.457906	0.43026	0.598739	0.737769	0.68319	0.448413
5	0.149242	0.171862	0.043711	0.0873866	0.0708535	0.582205	0.204716	0.880619	0.83871	0.773684	0.676558	0.663443	0.494148	0.657366	0.673913	0.659208	0.124438	0.163588	0.170667	0.192237	0.934537	1.03205	1.21388	1.37921	1.19569	1.17463	1.43098	0.794183	0.891304	1.02639	1.44637	1.42857	0.223529	0.304507	0.195812	0.20198	0.288575	0.156164	1.61929	1.83704	0.790524	0.534332	0.427586	0.459959	0.439716	0.613445	0.755382	0.702586	0.44246
5.05	0.156425	0.176917	0.0374665	0.0807914	0.0644122	0.576402	0.202572	0.898305	0.86217	0.764211	0.646884	0.653772	0.479844	0.658482	0.660535	0.657487	0.106447	0.197889	0.186667	0.170055	0.941309	1.03526	1.23265	1.39888	1.19961	1.13787	1.39731	0.776286	0.897516	1.03958	1.30796	1.37302	0.227941	0.281364	0.170681	0.191089	0.26384	0.128767	1.51777	1.60741	0.753117	0.548065	0.451724	0.445585	0.410165	0.62605	0.747554	0.693966	0.440476
5.1	0.158021	0.172704	0.0463872	0.0824402	0.0571659	0.546422	0.193998	0.869565	0.841642	0.724211	0.661721	0.647969	0.505852	0.658482	0.67893	0.674699	0.103448	0.203166	0.188	0.173752	0.961625	1.03846	1.22139	1.3736	1.18982	1.12684	1.43434	0.796421	0.906832	1.03958	1.3564	1.42063	0.245588	0.304507	0.18534	0.205941	0.297998	0.130137	1.61421	1.8	0.753117	0.540574	0.351724	0.474333	0.419622	0.605042	0.751468	0.715517	0.426587
5.15	0.177973	0.162595	0.0374665	0.0700742	0.0507246	0.531915	0.190782	0.890199	0.84653	0.754737	0.664688	0.667311	0.486346	0.647321	0.692308	0.697074	0.11994	0.21372	0.205333	0.179298	0.925508	0.990385	1.22889	1.41292	1.18982	1.07721	1.3569	0.749441	0.804348	1.08707	1.25952	1.27778	0.258824	0.321559	0.184293	0.182178	0.300353	0.134247	1.56345	1.82963	0.755611	0.54432	0.386207	0.492813	0.429078	0.581933	0.74364	0.6875	0.412698
5.2	0.193935	0.168492	0.0347904	0.0783182	0.0636071	0.524178	0.196141	0.886514	0.83871	0.755789	0.679525	0.673114	0.522757	0.668527	0.687291	0.674699	0.11994	0.171504	0.197333	0.203327	0.923251	0.961538	1.19137	1.38202	1.18787	1.09191	1.34007	0.740492	0.857143	1.04222	1.21453	1.3254	0.2	0.282582	0.163351	0.177228	0.292108	0.127397	1.49239	1.68148	0.733167	0.52809	0.403448	0.468172	0.450355	0.581933	0.733855	0.68319	0.430556
5.25	0.169194	0.169334	0.043711	0.0708986	0.0515298	0.565764	0.185423	0.889462	0.83871	0.736842	0.667656	0.655706	0.486346	0.654018	0.682274	0.679862	0.0989505	0.205805	0.189333	0.171904	0.918736	1.02885	1.17636	1.37921	1.20157	1.06985	1.39057	0.780761	0.854037	1.03694	1.22145	1.36905	0.188235	0.285018	0.168586	0.192079	0.322733	0.139726	1.53807	1.72593	0.760599	0.548065	0.410345	0.478439	0.490544	0.57563	0.716243	0.674569	0.412698
5.3	0.153232	0.161752	0.0330062	0.0667766	0.057971	0.54352	0.17149	0.884304	0.833822	0.731579	0.661721	0.663443	0.525358	0.654018	0.670569	0.69191	0.113943	0.187335	0.186667	0.181146	0.918736	1.04167	1.16698	1.37079	1.17221	1.09743	1.43434	0.767338	0.860248	1.06596	1.11765	1.3373	0.192647	0.27162	0.148691	0.164356	0.288575	0.0986301	1.35533	1.48889	0.74813	0.525593	0.406897	0.486653	0.492908	0.554622	0.720157	0.681034	0.388889
5.35	0.15004	0.165122	0.0276539	0.0651278	0.0587762	0.60735	0.17149	0.891673	0.83871	0.754737	0.676558	0.676983	0.517555	0.658482	0.700669	0.693632	0.113943	0.234828	0.197333	0.184843	0.871332	0.980769	1.16135	1.33146	1.17025	1.05331	1.34007	0.751678	0.835404	1.07124	1.15571	1.37302	0.241176	0.26553	0.162304	0.178218	0.293286	0.128767	1.46193	1.6	0.72818	0.519351	0.410345	0.492813	0.463357	0.569328	0.7182	0.696121	0.402778
5.4	0.169992	0.160067	0.0205174	0.0610058	0.0402576	0.651838	0.151125	0.885777	0.849462	0.709474	0.688427	0.665377	0.509753	0.647321	0.698997	0.67642	0.115442	0.203166	0.190667	0.184843	0.875847	1	1.09756	1.30899	1.13699	1.0386	1.30976	0.715884	0.801242	1.02111	1.10727	1.38095	0.239706	0.275274	0.147644	0.170297	0.290931	0.112329	1.49746	1.55556	0.738155	0.520599	0.413793	0.501027	0.464539	0.569328	0.712329	0.696121	0.373016
5.45	0.142857	0.165122	0.0249777	0.0667766	0.0523349	0.565764	0.174705	0.88283	0.768328	0.657895	0.670623	0.669246	0.496749	0.674107	0.697324	0.643718	0.115442	0.155673	0.110667	0.201479	0.887133	1.03205	1.12008	1.31461	1.14481	1.06801	1.3569	0.747204	0.804348	1.02375	1.07958	1.29365	0.225	0.275274	0.146597	0.167327	0.262662	0.110959	1.43147	1.57037	0.733167	0.546816	0.362069	0.49692	0.456265	0.577731	0.720157	0.689655	0.378968
5.5	0.153232	0.166807	0.0214095	0.0577082	0.0458937	0.55706	0.158628	0.862196	0.723363	0.570526	0.688427	0.673114	0.503251	0.668527	0.695652	0.695353	0.112444	0.200528	0.088	0.184843	0.871332	0.907051	1.10882	1.32022	1.17417	0.976103	1.2963	0.702461	0.717391	1.01055	0.989619	1.23413	0.241176	0.300853	0.156021	0.165347	0.282686	0.108219	1.50761	1.55556	0.738155	0.540574	0.393103	0.513347	0.462175	0.598739	0.720157	0.685345	0.396825
5.55	0.141261	0.16428	0.0258698	0.059357	0.0450886	0.523211	0.163987	0.826824	0.686217	0.544211	0.679525	0.655706	0.478544	0.658482	0.685619	0.685026	0.121439	0.197889	0.0813333	0.177449	0.851016	0.900641	1.1182	1.29494	1.12329	1.00735	1.27609	0.695749	0.770186	0.931398	0.99654	1.27778	0.186765	0.254568	0.134031	0.153465	0.255595	0.112329	1.29949	1.32593	0.738155	0.556804	0.4	0.466119	0.449173	0.598739	0.710372	0.681034	0.386905
5.6	0.209098	0.165122	0.0258698	0.0601814	0.047504	0.510638	0.172562	0.812822	0.667644	0.473684	0.688427	0.669246	0.478544	0.672991	0.695652	0.678141	0.124438	0.197889	0.08	0.171904	0.918736	0.971154	1.08255	1.32584	1.10176	0.983456	1.3367	0.693512	0.84472	0.949868	1.01384	1.3254	0.232353	0.269184	0.154974	0.174257	0.28033	0.123288	1.40609	1.52593	0.745636	0.540574	0.413793	0.472279	0.452719	0.594538	0.714286	0.668103	0.396825
5.65	0.203512	0.151643	0.0214095	0.055235	0.0450886	0.516441	0.150054	0.826087	0.679374	0.453684	0.691395	0.653772	0.491547	0.669643	0.69398	0.685026	0.113943	0.216359	0.0773333	0.181146	0.909707	0.967949	1.11445	1.33427	1.15656	1.0625	1.33333	0.776286	0.841615	1.03694	0.941176	1.20238	0.188235	0.257004	0.120419	0.131683	0.270907	0.0986301	1.22335	1.31111	0.715711	0.54432	0.313793	0.431211	0.401891	0.596639	0.700587	0.681034	0.384921
5.7	0.165204	0.135636	0.0169492	0.0544106	0.0394525	0.50677	0.154341	0.800295	0.652004	0.418947	0.706231	0.680851	0.472042	0.668527	0.682274	0.70568	0.122939	0.242744	0.0906667	0.195933	0.828442	0.916667	1.06004	1.26685	1.11937	0.996324	1.20539	0.720358	0.773292	0.934037	1.04152	1.27381	0.194118	0.252132	0.13822	0.167327	0.261484	0.116438	1.32487	1.51111	0.735661	0.534332	0.4	0.464066	0.411348	0.577731	0.708415	0.676724	0.392857
5.75	0.158021	0.137321	0.0178412	0.0560594	0.0402576	0.491296	0.143623	0.722181	0.621701	0.316842	0.691395	0.663443	0.478544	0.666295	0.658863	0.695353	0.121439	0.218997	0.0853333	0.186691	0.812641	0.903846	1.03189	1.26966	1.1135	1	1.25253	0.720358	0.717391	0.936675	0.986159	1.25794	0.179412	0.248477	0.141361	0.157426	0.24735	0.106849	1.37056	1.47407	0.718204	0.520599	0.389655	0.459959	0.413712	0.573529	0.704501	0.653017	0.378968
5.8	0.157223	0.131424	0.0115968	0.0453421	0.0386473	0.491296	0.132905	0.792189	0.645161	0.434737	0.682493	0.659574	0.479844	0.635045	0.648829	0.679862	0.101949	0.229551	0.096	0.168207	0.8307	0.88141	1.03752	1.28652	1.08806	1.01103	1.17508	0.727069	0.770186	0.970976	0.944637	1.25794	0.157353	0.238733	0.128796	0.154455	0.220259	0.113699	1.22335	1.33333	0.715711	0.484395	0.389655	0.439425	0.451537	0.55042	0.688845	0.659483	0.361111
5.85	0.156425	0.130581	0.015165	0.0478153	0.037037	0.492263	0.122186	0.823876	0.649071	0.453684	0.709199	0.651838	0.50065	0.65067	0.665552	0.716007	0.122939	0.197889	0.0866667	0.192237	0.889391	0.929487	1.03377	1.28371	1.12133	1.03309	1.21549	0.753915	0.763975	0.997361	0.899654	1.20238	0.152941	0.241169	0.121466	0.145545	0.215548	0.106849	1.20812	1.31111	0.698254	0.500624	0.389655	0.416838	0.432624	0.52521	0.690802	0.637931	0.361111
5.9	0.149242	0.124684	0.0133809	0.0469909	0.0338164	0.499033	0.129689	0.792926	0.652004	0.385263	0.649852	0.642166	0.455137	0.649554	0.658863	0.681583	0.113943	0.203166	0.076	0.18854	0.823928	0.894231	1.02627	1.26124	1.11937	1.01103	1.21886	0.729306	0.754658	0.934037	0.961938	1.21429	0.173529	0.235079	0.122513	0.149505	0.253239	0.115068	1.25888	1.23704	0.705736	0.50437	0.341379	0.439425	0.42435	0.544118	0.702544	0.644397	0.343254
5.95	0.15004	0.127211	0.00802855	0.0403957	0.0362319	0.517408	0.102894	0.797347	0.656891	0.384211	0.658754	0.640232	0.457737	0.646205	0.682274	0.690189	0.112444	0.21372	0.0786667	0.184843	0.792325	0.88141	0.979362	1.2191	1.08611	0.981618	1.09764	0.718121	0.68323	0.918206	0.916955	1.22222	0.151471	0.243605	0.12356	0.145545	0.254417	0.10411	1.24365	1.2963	0.683292	0.520599	0.372414	0.427105	0.398345	0.552521	0.671233	0.653017	0.367063
6	0.146848	0.124684	0.00535236	0.0412201	0.0362319	0.537718	0.096463	0.813559	0.670577	0.387368	0.673591	0.634429	0.475943	0.675223	0.657191	0.669535	0.11994	0.205805	0.072	0.192237	0.835214	0.996795	1.00563	1.23596	1.10568	1.04779	1.19865	0.769575	0.782609	0.926121	0.885813	1.20238	0.161765	0.237515	0.104712	0.131683	0.212014	0.113699	1.17259	1.32593	0.688279	0.514357	0.372414	0.398357	0.420804	0.548319	0.682975	0.646552	0.343254
6.05	0.158021	0.143218	0.014273	0.0412201	0.041868	0.553191	0.091104	0.768607	0.608993	0.350526	0.670623	0.636364	0.435631	0.643973	0.658863	0.685026	0.107946	0.226913	0.0826667	0.190388	0.812641	0.913462	0.984991	1.25	1.10763	0.994485	1.16162	0.700224	0.729814	0.886544	0.806228	1.13095	0.116176	0.20341	0.0921466	0.115842	0.188457	0.0835616	1.1066	1.15556	0.678304	0.500624	0.324138	0.406571	0.42435	0.535714	0.679061	0.655172	0.313492
6.1	0.136472	0.120472	0.00535236	0.0354493	0.0297907	0.508704	0.0857449	0.797347	0.644184	0.371579	0.670623	0.638298	0.435631	0.642857	0.657191	0.685026	0.112444	0.203166	0.08	0.18854	0.792325	0.836538	0.973734	1.23596	1.10176	0.972426	1.07744	0.695749	0.68323	0.878628	0.795848	1.13492	0.155882	0.231425	0.117277	0.140594	0.208481	0.0945205	1.18782	1.28148	0.673317	0.50437	0.375862	0.447639	0.410165	0.554622	0.669276	0.62069	0.31746
6.15	0.124501	0.113732	0.0169492	0.0469909	0.0338164	0.416828	0.096463	0.767133	0.620723	0.329474	0.679525	0.651838	0.435631	0.629464	0.652174	0.679862	0.11994	0.248021	0.0946667	0.186691	0.774266	0.849359	0.934334	1.17135	1.0411	0.961397	1.07407	0.718121	0.717391	0.899736	0.861592	1.1627	0.15	0.239951	0.11623	0.141584	0.220259	0.109589	1.17766	1.21481	0.703242	0.508115	0.393103	0.420945	0.410165	0.581933	0.655577	0.644397	0.327381
6.2	0.11253	0.0977254	0.00356824	0.0214345	0.0144928	0.437137	0.0750268	0.764923	0.601173	0.344211	0.661721	0.626692	0.420026	0.628348	0.657191	0.678141	0.110945	0.218997	0.096	0.190388	0.79684	0.852564	0.934334	1.19382	1.05479	0.96875	1.01347	0.715884	0.726708	0.883905	0.802768	1.19048	0.172059	0.221681	0.110995	0.133663	0.191991	0.090411	1.1066	1.17037	0.688279	0.531835	0.310345	0.377823	0.384161	0.556723	0.692759	0.627155	0.347222
6.25	0.149242	0.113732	0.0303301	0.0313273	0.020934	0.478723	0.0900322	0.770818	0.608993	0.344211	0.679525	0.632495	0.43303	0.642857	0.643813	0.681583	0.112444	0.197889	0.0773333	0.195933	0.772009	0.826923	0.954972	1.20506	1.06262	0.963235	1.04377	0.702461	0.708075	0.891821	0.820069	1.19841	0.139706	0.226553	0.110995	0.132673	0.179034	0.0972603	1.11675	1.18519	0.650873	0.516854	0.365517	0.37577	0.353428	0.565126	0.675147	0.603448	0.353175
6.3	0.135674	0.101938	0.0240856	0.0313273	0.0144928	0.422631	0.0750268	0.779661	0.629521	0.32	0.655786	0.62089	0.422627	0.618304	0.625418	0.683305	0.121439	0.195251	0.0693333	0.192237	0.747178	0.830128	0.902439	1.1236	1.03718	0.948529	1.0404	0.706935	0.704969	0.836412	0.747405	1.16667	0.155882	0.230207	0.104712	0.123762	0.193168	0.10137	1.1066	1.20741	0.670823	0.523096	0.348276	0.410678	0.334515	0.584034	0.663405	0.614224	0.343254
6.35	0.123703	0.103623	0.0223015	0.0346249	0.0257649	0.433269	0.0846731	0.750921	0.584555	0.290526	0.703264	0.653772	0.421326	0.625	0.658863	0.685026	0.124438	0.237467	0.0893333	0.19963	0.76298	0.862179	0.926829	1.13764	1.04305	0.950368	1.06734	0.700224	0.714286	0.875989	0.733564	1.09921	0.161765	0.200974	0.0900524	0.109901	0.142521	0.069863	1.05584	1	0.65586	0.506866	0.341379	0.37577	0.3487	0.537815	0.675147	0.622845	0.337302
6.4	0.126895	0.104465	0.0267618	0.0313273	0.0217391	0.410058	0.0878885	0.731761	0.562072	0.275789	0.682493	0.628627	0.422627	0.616071	0.677258	0.707401	0.11994	0.184697	0.0906667	0.19963	0.758465	0.807692	0.909944	1.13202	1.07241	0.904412	0.929293	0.720358	0.698758	0.897098	0.792388	1.14286	0.0926471	0.210719	0.125654	0.158416	0.150766	0.0821918	1.08629	1.04444	0.645885	0.515605	0.358621	0.437372	0.347518	0.55042	0.649706	0.599138	0.339286
6.45	0.125299	0.108677	0.0240856	0.0313273	0.02657	0.400387	0.079314	0.75608	0.59433	0.323158	0.732938	0.676983	0.443433	0.632812	0.690635	0.709122	0.149925	0.195251	0.0773333	0.225508	0.738149	0.778846	0.902439	1.13483	1.03523	0.898897	1.0101	0.671141	0.68323	0.825858	0.688581	1.10714	0.166176	0.224117	0.0900524	0.112871	0.163722	0.0876712	1.03553	1.08889	0.643392	0.531835	0.327586	0.420945	0.335697	0.542017	0.671233	0.625	0.337302
6.5	0.125299	0.100253	0.00892061	0.0173124	0.0177134	0.413926	0.0600214	0.76566	0.59433	0.304211	0.697329	0.636364	0.436931	0.622768	0.682274	0.69191	0.134933	0.226913	0.084	0.205176	0.711061	0.75641	0.889306	1.08708	1.01957	0.919118	0.93266	0.642058	0.636646	0.796834	0.768166	1.13889	0.135294	0.216809	0.110995	0.142574	0.137809	0.0945205	1.1066	1.07407	0.620948	0.520599	0.3	0.38809	0.341608	0.535714	0.663405	0.603448	0.30754
6.55	0.137271	0.106992	0.0196253	0.012366	0.0193237	0.419729	0.0535906	0.692704	0.528837	0.188421	0.721068	0.676983	0.414824	0.603795	0.69398	0.709122	0.122939	0.255937	0.114667	0.192237	0.740406	0.807692	0.864916	1.0618	1.03131	0.919118	0.939394	0.666667	0.68323	0.82058	0.678201	1.06349	0.114706	0.207065	0.0858639	0.111881	0.111896	0.0630137	0.928934	0.940741	0.660848	0.526841	0.286207	0.38193	0.36052	0.52521	0.645793	0.596983	0.323413
6.6	0.122905	0.0968829	0.0133809	0.0156636	0.0201288	0.382012	0.0514469	0.700811	0.511241	0.169474	0.694362	0.642166	0.43303	0.621652	0.688963	0.702238	0.128936	0.23219	0.101333	0.192237	0.72912	0.804487	0.87242	1.0927	1.01566	0.933824	0.946128	0.671141	0.624224	0.83905	0.647059	1.00794	0.130882	0.194884	0.0743455	0.0950495	0.11543	0.0671233	0.923858	0.911111	0.613466	0.524345	0.255172	0.386037	0.341608	0.514706	0.639922	0.568966	0.281746
6.65	0.128492	0.0960404	0.0133809	0.016488	0.020934	0.377176	0.0546624	0.686072	0.518084	0.162105	0.676558	0.618956	0.405722	0.607143	0.652174	0.690189	0.131934	0.184697	0.106667	0.210721	0.751693	0.762821	0.883677	1.07303	1.01957	0.933824	0.986532	0.646532	0.621118	0.778364	0.66436	1.00794	0.129412	0.216809	0.0827225	0.10495	0.134276	0.0808219	0.974619	0.97037	0.63591	0.496879	0.303448	0.418891	0.328605	0.497899	0.649706	0.599138	0.301587
6.7	0.141261	0.0968829	0.00267618	0	0.00805153	0.423598	0.0257235	0.659543	0.484848	0.115789	0.676558	0.630561	0.391417	0.601562	0.675585	0.698795	0.127436	0.187335	0.112	0.207024	0.724605	0.798077	0.855535	1.01685	0.992172	0.919118	0.93266	0.642058	0.636646	0.781003	0.595156	1.04762	0.111765	0.202192	0.0837696	0.111881	0.117786	0.0767123	0.969543	0.977778	0.630923	0.491885	0.310345	0.476386	0.313239	0.518908	0.636008	0.579741	0.301587
6.75	0.131684	0.0935131	0.00802855	0.0140148	0.02657	0.400387	0.0428725	0.632277	0.476051	0.0894737	0.646884	0.601547	0.357607	0.592634	0.643813	0.681583	0.131934	0.187335	0.116	0.201479	0.683973	0.676282	0.866792	1.01124	1.00978	0.867647	0.868687	0.637584	0.562112	0.757256	0.622837	1.05159	0.0897059	0.181486	0.0827225	0.10198	0.100118	0.0575342	0.878173	0.8	0.625935	0.499376	0.313793	0.480493	0.341608	0.512605	0.637965	0.56681	0.291667
6.8	0.147646	0.105307	0.0133809	0.0107172	0.0297907	0.376209	0.0310825	0.647015	0.478006	0.0968421	0.661721	0.622824	0.361508	0.591518	0.662207	0.678141	0.13943	0.184697	0.124	0.219963	0.722348	0.788462	0.866792	0.980337	0.986301	0.898897	0.909091	0.639821	0.596273	0.799472	0.591696	1.01984	0.155882	0.199756	0.0743455	0.10495	0.124853	0.0767123	0.928934	0.874074	0.618454	0.50437	0.289655	0.443532	0.339243	0.529412	0.634051	0.581897	0.31746
6.85	0.146049	0.0943555	0	0.00659522	0.0161031	0.402321	0.0235798	0.646279	0.486804	0.0978947	0.655786	0.599613	0.361508	0.589286	0.667224	0.695353	0.145427	0.118734	0.121333	0.225508	0.681716	0.740385	0.833021	0.977528	0.994129	0.871324	0.878788	0.642058	0.57764	0.736148	0.643599	0.980159	0.141176	0.194884	0.0795812	0.0980198	0.103651	0.0712329	0.93401	0.851852	0.605985	0.491885	0.268966	0.451745	0.364066	0.495798	0.612524	0.575431	0.323413
6.9	0.138867	0.0876158	0.00713649	0.00741962	0.0152979	0.408124	0.0203644	0.652174	0.474096	0.111579	0.637982	0.578337	0.347204	0.571429	0.617057	0.662651	0.127436	0.139842	0.118667	0.205176	0.717833	0.75	0.844278	1.02247	1	0.889706	0.936027	0.655481	0.627329	0.757256	0.619377	1.03175	0.116176	0.194884	0.0743455	0.1	0.103651	0.0767123	0.888325	0.888889	0.605985	0.480649	0.296552	0.402464	0.314421	0.516807	0.630137	0.586207	0.305556
6.95	0.163607	0.0893008	0.015165	0.00741962	0.00241546	0.394584	0.0203644	0.706706	0.519062	0.187368	0.679525	0.624758	0.395319	0.591518	0.670569	0.709122	0.151424	0.174142	0.113333	0.238447	0.715576	0.730769	0.840525	0.991573	0.988258	0.880515	0.888889	0.653244	0.586957	0.728232	0.602076	1	0.107353	0.186358	0.0764398	0.10495	0.0977621	0.069863	0.944162	0.837037	0.571072	0.47191	0.272414	0.359343	0.29078	0.495798	0.620352	0.553879	0.27381
7	0.144453	0.0901432	0.0240856	0	0.00966184	0.470986	0.0267953	0.732498	0.539589	0.269474	0.700297	0.646035	0.403121	0.618304	0.688963	0.736661	0.145427	0.242744	0.124	0.238447	0.674944	0.746795	0.833021	1	0.966732	0.869485	0.895623	0.63311	0.596273	0.754617	0.584775	0.996032	0.145588	0.208283	0.0638743	0.0851485	0.0954064	0.0958904	0.888325	0.903704	0.581047	0.463171	0.206897	0.36345	0.270686	0.462185	0.598826	0.549569	0.299603
7.05	0.229848	0.132266	0.180196	0.00989283	0.0507246	0.441973	0.0257235	0.671334	0.493646	0.187368	0.715134	0.665377	0.397919	0.636161	0.714047	0.795181	0.16042	0.292876	0.162667	0.242144	0.733634	0.794872	0.818011	0.97191	0.986301	0.863971	0.888889	0.659955	0.627329	0.754617	0.560554	0.972222	0.105882	0.186358	0.0743455	0.0950495	0.0824499	0.0479452	0.898477	0.792593	0.553616	0.461923	0.237931	0.342916	0.263593	0.472689	0.596869	0.549569	0.297619
7.1	0.457302	0.180286	0.331847	0.0560594	0.161836	0.529014	0.129689	0.608696	0.427175	0.00947368	0.744807	0.667311	0.335501	0.640625	0.70903	0.836489	0.172414	0.327177	0.268	0.247689	0.706546	0.769231	0.801126	0.938202	0.976517	0.854779	0.841751	0.657718	0.60559	0.757256	0.532872	0.980159	0.135294	0.19123	0.0806283	0.10495	0.0859835	0.0506849	0.888325	0.866667	0.561097	0.453184	0.268966	0.396304	0.244681	0.472689	0.590998	0.547414	0.281746
7.15	0.501197	0.211457	0.384478	0.10305	0.227053	0.668279	0.249732	0.615328	0.428152	0	0.74184	0.680851	0.356307	0.657366	0.72408	0.851979	0.191904	0.401055	0.333333	0.25878	0.699774	0.730769	0.806754	0.932584	0.976517	0.840074	0.851852	0.655481	0.568323	0.730871	0.536332	0.97619	0.123529	0.200974	0.086911	0.109901	0.114252	0.0726027	0.888325	0.777778	0.583541	0.494382	0.289655	0.379877	0.267139	0.476891	0.604697	0.545259	0.311508
7.2	0.514765	0.244313	0.44157	0.160758	0.331723	0.691489	0.350482	0.91378	0.774194	0.696842	0.706231	0.686654	0.527958	0.773437	0.73913	0.79346	0.17991	0.387863	0.317333	0.292052	0.72009	0.775641	0.818011	0.907303	0.966732	0.865809	0.929293	0.675615	0.624224	0.720317	0.539792	0.912698	0.101471	0.176614	0.0649215	0.0811881	0.0906949	0.0493151	0.822335	0.718519	0.643392	0.596754	0.410345	0.373717	0.274232	0.62395	0.694716	0.633621	0.371032
7.25	0.523543	0.273799	0.477252	0.205276	0.388084	0.695358	0.442658	0.983051	0.875855	0.810526	0.756677	0.731141	0.552666	0.81808	0.745819	0.79346	0.202399	0.509235	0.477333	0.314233	0.699774	0.692308	0.793621	0.867978	0.976517	0.840074	0.86532	0.63311	0.621118	0.71504	0.515571	0.90873	0.101471	0.187576	0.0806283	0.10099	0.0895171	0.0534247	0.837563	0.733333	0.735661	0.701623	0.527586	0.427105	0.291962	0.726891	0.76908	0.709052	0.468254
7.3	0.544294	0.298231	0.517395	0.234955	0.416264	0.712766	0.50911	0.988946	0.908113	0.828421	0.732938	0.754352	0.585176	0.829241	0.765886	0.788296	0.22039	0.575198	0.596	0.316081	0.683973	0.730769	0.772983	0.856742	0.953033	0.825368	0.851852	0.630872	0.586957	0.672823	0.519031	0.940476	0.105882	0.180268	0.0837696	0.111881	0.0906949	0.0589041	0.832487	0.755556	0.805486	0.769039	0.662069	0.480493	0.329787	0.77521	0.847358	0.756466	0.505952
7.35	0.560255	0.344566	0.565566	0.3108	0.492754	0.715667	0.631297	1	0.956989	0.828421	0.744807	0.744681	0.595579	0.876116	0.762542	0.812392	0.254873	0.617414	0.693333	0.32902	0.672686	0.701923	0.772983	0.823034	0.953033	0.806985	0.861953	0.61745	0.596273	0.659631	0.467128	0.916667	0.120588	0.186358	0.0774869	0.0960396	0.0836278	0.0561644	0.791878	0.62963	0.842893	0.86392	0.7	0.554415	0.361702	0.857143	0.890411	0.829741	0.581349
7.4	0.592977	0.385004	0.598573	0.374279	0.612721	0.737911	0.707395	0.995578	0.943304	0.866316	0.762611	0.783366	0.639792	0.908482	0.779264	0.836489	0.298351	0.667546	0.733333	0.373383	0.665914	0.714744	0.75985	0.823034	0.947162	0.816176	0.841751	0.635347	0.583851	0.69657	0.484429	0.920635	0.158824	0.18514	0.0774869	0.0990099	0.0789164	0.0657534	0.736041	0.622222	0.870324	0.890137	0.834483	0.601643	0.398345	0.934874	0.921722	0.846983	0.652778
7.45	0.594573	0.41786	0.628903	0.449299	0.668277	0.711799	0.754555	0.991894	0.938416	0.862105	0.810089	0.820116	0.656697	0.922991	0.780936	0.834768	0.337331	0.680739	0.802667	0.384473	0.672686	0.717949	0.801126	0.848315	0.95499	0.821691	0.83165	0.630872	0.571429	0.738786	0.425606	0.888889	0.136765	0.20341	0.0848168	0.1	0.0647821	0.0328767	0.761421	0.592593	0.877805	0.952559	0.8	0.61191	0.41253	0.960084	0.945205	0.875	0.710317
7.5	0.628093	0.502949	0.652096	0.521022	0.701288	0.754352	0.81672	0.971997	0.954057	0.854737	0.783383	0.7853	0.695709	0.9375	0.777592	0.839931	0.347826	0.707124	0.804	0.408503	0.656885	0.746795	0.791745	0.839888	0.966732	0.878676	0.851852	0.671141	0.559006	0.712401	0.553633	0.865079	0.0985294	0.16687	0.0774869	0.119802	0.0694935	0.0589041	0.746193	0.592593	0.895262	0.948814	0.834483	0.63655	0.445626	0.970588	0.915851	0.853448	0.730159
7.55	0.643256	0.521483	0.664585	0.577082	0.71095	0.745648	0.822079	0.976419	0.985337	0.862105	0.810089	0.820116	0.719116	0.94308	0.811037	0.855422	0.407796	0.736148	0.834667	0.421442	0.647856	0.711538	0.767355	0.817416	0.939335	0.816176	0.818182	0.619687	0.559006	0.701847	0.515571	0.869048	0.145588	0.192448	0.0837696	0.108911	0.0612485	0.0479452	0.817259	0.622222	0.937656	0.988764	0.824138	0.646817	0.481087	1	0.960861	0.866379	0.771825
7.6	0.683958	0.565291	0.693131	0.641385	0.73752	0.768859	0.859593	0.952837	0.930596	0.886316	0.807122	0.827853	0.756827	0.950893	0.816054	0.865749	0.434783	0.765172	0.846667	0.462107	0.654628	0.637821	0.763602	0.820225	0.917808	0.795956	0.754209	0.637584	0.549689	0.670185	0.487889	0.900794	0.148529	0.186358	0.0827225	0.111881	0.0883392	0.0479452	0.761421	0.674074	0.937656	0.981273	0.868966	0.685832	0.514184	0.995798	0.945205	0.87931	0.767857
7.65	0.710295	0.593092	0.71008	0.670239	0.739936	0.772727	0.873526	0.929256	0.994135	0.894737	0.84273	0.841393	0.784135	1	0.832776	0.903614	0.46027	0.804749	0.885333	0.478743	0.681716	0.657051	0.780488	0.803371	0.927593	0.792279	0.808081	0.612975	0.562112	0.646438	0.474048	0.869048	0.120588	0.194884	0.0858639	0.105941	0.0930506	0.0561644	0.690355	0.525926	0.947631	0.981273	0.837931	0.710472	0.573286	0.987395	0.976517	0.881466	0.819444
7.7	0.754988	0.616681	0.719893	0.707337	0.747987	0.783366	0.901393	0.915991	0.98827	0.903158	0.818991	0.847195	0.778934	0.970982	0.832776	0.865749	0.530735	0.762533	0.870667	0.515712	0.672686	0.692308	0.752345	0.772472	0.925636	0.775735	0.744108	0.610738	0.580745	0.635884	0.539792	0.861111	0.0955882	0.193666	0.103665	0.132673	0.102473	0.0780822	0.736041	0.622222	0.965087	0.958801	0.910345	0.728953	0.582742	0.989496	0.962818	0.890086	0.831349
7.75	0.778132	0.641955	0.745763	0.740313	0.761675	0.793037	0.927117	0.910096	0.997067	0.943158	0.818991	0.856867	0.837451	0.969866	0.851171	0.879518	0.526237	0.83905	0.916	0.521257	0.672686	0.657051	0.787992	0.817416	0.92955	0.783088	0.814815	0.635347	0.574534	0.62533	0.429066	0.765873	0.111765	0.199756	0.102618	0.114851	0.0871614	0.039726	0.715736	0.503704	0.937656	0.973783	0.9	0.778234	0.638298	0.987395	0.968689	0.894397	0.821429
7.8	0.806065	0.665543	0.768956	0.779885	0.773752	0.7853	0.939979	0.851879	0.937439	0.888421	0.836795	0.83559	0.846554	0.978795	0.851171	0.864028	0.574213	0.85752	0.905333	0.584104	0.744921	0.788462	0.825516	0.856742	0.949119	0.799632	0.821549	0.673378	0.639752	0.686016	0.453287	0.821429	0.142647	0.20341	0.143455	0.141584	0.109541	0.0643836	0.700508	0.540741	0.962594	1	0.982759	0.806982	0.666667	0.997899	0.966732	0.926724	0.833333
7.85	0.828412	0.68155	0.783229	0.793899	0.777778	0.798839	0.92926	0.870302	0.959922	0.922105	0.845697	0.839458	0.855657	0.965402	0.869565	0.860585	0.5997	0.854881	0.916	0.589649	0.756208	0.75641	0.853659	0.898876	0.978474	0.805147	0.794613	0.722595	0.689441	0.71504	0.435986	0.809524	0.164706	0.221681	0.169634	0.174257	0.156655	0.0684932	0.659898	0.562963	0.945137	0.986267	0.924138	0.815195	0.689125	0.989496	0.980431	0.890086	0.84127
7.9	0.84996	0.707666	0.791258	0.796373	0.7657	0.812379	0.944266	0.885777	0.99218	0.949474	0.830861	0.858801	0.894668	0.973214	0.886288	0.874355	0.629685	0.85752	0.898667	0.628466	0.749436	0.733974	0.846154	0.893258	0.976517	0.805147	0.835017	0.724832	0.701863	0.712401	0.529412	0.837302	0.188235	0.213155	0.19267	0.205941	0.166078	0.0863014	0.756345	0.577778	0.942643	0.978777	0.924138	0.790554	0.708038	0.964286	0.994129	0.903017	0.849206
7.95	0.696728	0.799495	0.808207	0.84831	0.8438	0.692456	0.989282	0.861459	0.961877	0.971579	0.839763	0.876209	0.897269	0.973214	0.891304	0.874355	0.644678	0.894459	0.928	0.659889	0.765237	0.724359	0.863039	0.898876	0.951076	0.832721	0.801347	0.762864	0.754658	0.74934	0.519031	0.813492	0.217647	0.238733	0.218848	0.224752	0.176678	0.0917808	0.822335	0.614815	0.952618	0.996255	0.986207	0.821355	0.732861	0.997899	1	1	0.867063
8	0.861133	0.74305	0.835861	0.833471	0.813205	0.823017	0.979636	0.893147	0.995112	0.978947	0.881306	0.89942	0.957087	0.987723	0.916388	0.884682	0.686657	0.934037	0.966667	0.663586	0.810384	0.846154	0.883677	0.890449	1	0.863971	0.851852	0.829978	0.826087	0.76781	0.546713	0.845238	0.239706	0.264312	0.296335	0.29604	0.217903	0.130137	0.817259	0.592593	1	0.96005	0.931034	0.864476	0.775414	0.995798	0.970646	0.913793	0.833333
8.05	0.88747	0.759899	0.855486	0.843364	0.822061	0.83559	0.978564	0.896094	1	0.975789	0.845697	0.876209	0.945384	0.972098	0.874582	0.891566	0.686657	0.881266	0.942667	0.665434	0.810384	0.836538	0.919325	0.929775	0.972603	0.878676	0.892256	0.818792	0.860248	0.778364	0.564014	0.833333	0.277941	0.276492	0.28377	0.287129	0.255595	0.126027	0.791878	0.651852	0.962594	0.987516	0.962069	0.870637	0.767139	0.976891	0.972603	0.920259	0.845238
8.1	0.897047	0.769166	0.874219	0.858203	0.839775	0.84913	0.973205	0.868091	0.951124	0.972632	0.854599	0.87234	0.928479	0.986607	0.919732	0.874355	0.709145	0.873351	0.922667	0.702403	0.814898	0.801282	0.908068	0.907303	0.968689	0.858456	0.895623	0.829978	0.804348	0.754617	0.598616	0.81746	0.316176	0.302071	0.33089	0.326733	0.282686	0.163014	0.771574	0.622222	0.950125	0.961298	1	0.889117	0.793144	0.985294	0.968689	0.896552	0.84127
8.15	0.909816	0.781803	0.890277	0.873866	0.846216	0.855899	0.991426	0.871776	0.969697	0.974737	0.863501	0.883946	0.963589	0.967634	0.897993	0.876076	0.70015	0.944591	0.957333	0.698706	0.860045	0.814103	0.968105	0.904494	0.986301	0.904412	0.956229	0.879195	0.888199	0.849604	0.640138	0.837302	0.360294	0.320341	0.363351	0.360396	0.332155	0.186301	0.84264	0.703704	0.942643	0.971286	0.975862	0.899384	0.789598	0.989496	0.943249	0.885776	0.823413
8.2	0.920192	0.792755	0.907226	0.877164	0.859098	0.874275	0.98821	0.854827	0.936461	0.935789	0.866469	0.893617	0.963589	0.975446	0.921405	0.870912	0.749625	0.92876	0.962667	0.720887	0.86456	0.875	0.979362	0.896067	0.966732	0.911765	0.936027	0.90604	0.909938	0.825858	0.581315	0.793651	0.382353	0.316687	0.370681	0.372277	0.341578	0.176712	0.771574	0.607407	0.935162	0.956305	0.993103	0.880903	0.809693	0.97479	0.943249	0.868534	0.867063
8.25	0.934557	0.811289	0.909902	0.870569	0.859903	0.900387	0.965702	0.857775	0.964809	0.963158	0.854599	0.916828	0.993498	0.984375	0.919732	0.919105	0.76012	0.963061	0.958667	0.746765	0.873589	0.836538	1	0.890449	0.976517	0.924632	0.919192	0.912752	0.89441	0.852243	0.650519	0.805556	0.444118	0.343484	0.424084	0.439604	0.386337	0.226027	0.857868	0.725926	0.94015	0.966292	0.968966	0.909651	0.832151	0.976891	0.945205	0.859914	0.827381
8.3	0.952913	0.840775	0.928635	0.892003	0.899356	0.910058	0.997856	0.869565	0.975562	0.965263	0.896142	0.911025	0.990897	0.973214	0.914716	0.898451	0.775112	0.965699	0.974667	0.728281	0.889391	0.958333	0.992495	0.859551	0.970646	0.933824	0.942761	0.95302	0.925466	0.891821	0.633218	0.801587	0.516176	0.356882	0.464921	0.460396	0.432273	0.243836	0.883249	0.785185	0.957606	0.986267	0.97931	0.909651	0.841608	0.987395	0.945205	0.872845	0.833333
8.35	0.947326	0.838248	0.920607	0.88953	0.882448	0.883946	0.975348	0.865144	0.947214	0.961053	0.913947	0.94971	0.989597	0.967634	0.946488	0.910499	0.788606	0.952507	0.977333	0.772643	0.862302	0.910256	0.97561	0.825843	0.943249	0.943015	0.939394	0.908277	0.906832	0.878628	0.740484	0.829365	0.517647	0.378806	0.502618	0.519802	0.473498	0.269863	0.812183	0.740741	0.955112	0.965044	0.972414	0.913758	0.841608	0.983193	0.917808	0.862069	0.882937
8.4	0.942538	0.840775	0.924175	0.892003	0.888889	0.889749	0.971061	0.907148	0.979472	0.987368	0.913947	0.924565	1	0.954241	0.931438	0.886403	0.802099	0.920844	0.985333	0.759704	0.925508	0.961538	0.962477	0.831461	0.943249	0.931985	0.946128	0.941834	0.947205	0.868074	0.698962	0.75	0.519118	0.392205	0.520419	0.517822	0.468787	0.258904	0.761421	0.637037	0.925187	0.973783	0.903448	0.938398	0.858156	0.947479	0.90998	0.855603	0.867063
8.45	0.96648	0.857624	0.933095	0.903545	0.909018	0.888781	0.989282	0.866618	0.953079	0.946316	0.884273	0.938104	0.954486	0.969866	0.944816	0.891566	0.827586	0.952507	0.993333	0.787431	0.950339	0.99359	0.971857	0.794944	0.958904	0.955882	0.96633	0.970917	0.959627	0.92876	0.743945	0.829365	0.573529	0.421437	0.571728	0.60495	0.501767	0.30411	0.862944	0.733333	0.950125	0.975031	0.931034	0.946612	0.875887	0.962185	0.927593	0.866379	0.869048
8.5	0.951317	0.854254	0.933095	0.910965	0.907407	0.907157	0.994641	0.879882	0.968719	0.967368	0.890208	0.914894	0.971391	0.960938	0.938127	0.89673	0.844078	0.939314	1	0.815157	0.923251	0.980769	0.932458	0.786517	0.939335	0.957721	0.929293	0.959732	0.928571	0.920844	0.750865	0.861111	0.583824	0.428745	0.613613	0.626733	0.565371	0.350685	0.903553	0.725926	0.955112	0.94382	0.975862	0.924025	0.879433	0.945378	0.927593	0.849138	0.867063
8.55	0.957702	0.8492	0.933988	0.901896	0.906602	0.904255	0.935691	0.87325	0.940371	0.982105	0.890208	0.928433	1	0.960938	0.923077	0.92599	0.821589	0.949868	0.98	0.804067	0.909707	0.987179	0.941839	0.792135	0.937378	0.950368	0.942761	0.959732	0.931677	0.934037	0.737024	0.809524	0.625	0.467722	0.652356	0.641584	0.614841	0.357534	0.883249	0.755556	0.927681	0.966292	0.913793	0.930185	0.879433	0.918067	0.906067	0.844828	0.871032
8.6	0.97925	0.882056	0.956289	0.931575	0.928341	0.941973	0.973205	0.860722	0.926686	0.943158	0.937685	0.96325	0.985696	0.964286	0.931438	0.908778	0.886057	0.978892	0.977333	0.857671	0.936795	0.996795	0.908068	0.775281	0.935421	0.959559	1	0.982103	0.947205	0.949868	0.83391	0.944444	0.651471	0.481121	0.731937	0.69505	0.62662	0.410959	1	0.822222	0.935162	0.970037	0.9	0.942505	0.878251	0.922269	0.888454	0.840517	0.892857
8.65	0.968077	0.873631	0.942016	0.934872	0.928341	0.930368	0.977492	0.878408	0.959922	0.962105	0.919881	0.959381	0.988296	0.947545	0.929766	0.900172	0.872564	0.955145	0.978667	0.852126	0.959368	1	0.894934	0.77809	0.931507	0.96875	0.929293	0.973154	1	0.965699	0.67474	0.813492	0.666176	0.521315	0.728796	0.677228	0.667845	0.393151	0.84264	0.874074	0.945137	0.952559	0.917241	0.913758	0.891253	0.962185	0.894325	0.842672	0.837302
8.7	1	0.889638	0.957181	0.935697	0.930757	0.958414	0.972133	0.888725	0.959922	0.957895	0.928783	0.955513	0.993498	0.945313	0.946488	0.888124	0.878561	0.984169	0.998667	0.859519	0.970655	0.948718	0.855535	0.814607	0.937378	0.972426	0.925926	0.988814	0.97205	0.98153	0.681661	0.734127	0.663235	0.521315	0.741361	0.694059	0.687868	0.4	0.796954	0.740741	0.94015	0.968789	0.87931	0.952772	0.893617	0.945378	0.896282	0.851293	0.871032
8.75	0.994413	0.885425	0.950937	0.939819	0.939614	0.960348	0.991426	0.866618	0.925709	0.96	0.946588	0.955513	0.997399	0.941964	0.946488	0.919105	0.890555	1	0.993333	0.887246	0.952596	0.974359	0.818011	0.761236	0.923679	0.970588	0.952862	0.955257	0.947205	0.918206	0.816609	0.809524	0.701471	0.577345	0.791623	0.759406	0.70318	0.460274	0.893401	0.881481	0.947631	0.963795	0.882759	0.946612	0.886525	0.903361	0.880626	0.818966	0.920635
8.8	1	0.903117	0.960749	0.955482	0.947665	0.964217	0.973205	0.751658	0.647116	0.509474	0.970326	1	0.860858	0.856027	1	1	0.931034	0.364116	0.453333	0.89464	0.948081	0.942308	0.763602	0.733146	0.88454	0.935662	0.868687	0.939597	0.900621	0.899736	0.764706	0.801587	0.707353	0.594397	0.809424	0.787129	0.710247	0.484932	0.878173	0.837037	0.937656	0.963795	0.917241	0.977413	0.917258	0.928571	0.870841	0.81681	0.880952
8.85	0.999202	0.901432	0.958965	0.947238	0.952496	0.964217	0.982851	0.91157	0.921799	0.951579	0.931751	0.957447	0.975293	0.91183	0.954849	0.908778	0.92054	0.870712	0.906667	0.896488	1	0.983974	0.769231	0.769663	0.92955	0.970588	0.915825	1	0.990683	0.989446	0.778547	0.904762	0.708824	0.590743	0.848168	0.836634	0.691402	0.527397	0.873096	0.807407	0.9202	0.948814	0.896552	0.971253	0.920804	0.926471	0.882583	0.81681	0.892857
8.9	0.970471	0.90059	0.935772	0.928277	0.924316	0.946809	0.949625	0.899042	0.916911	0.96	0.946588	0.94971	0.980494	0.926339	0.964883	0.915663	0.908546	0.920844	0.948	0.90573	0.943567	0.891026	0.722326	0.744382	0.890411	0.974265	0.929293	0.964206	0.934783	0.949868	0.788927	0.793651	0.720588	0.615104	0.848168	0.814851	0.755006	0.557534	0.822335	0.888889	0.895262	0.947566	0.893103	0.973306	0.905437	0.901261	0.874755	0.81681	0.926587
8.95	0.992817	0.905644	0.978591	0.97939	0.978261	0.950677	1	0.918939	0.913978	0.978947	0.922849	0.951644	0.977893	0.922991	0.934783	0.884682	0.914543	0.870712	0.934667	0.902033	0.945824	0.977564	0.716698	0.738764	0.919765	0.976103	0.946128	0.961969	0.968944	0.973615	0.806228	0.833333	0.755882	0.650426	0.899476	0.883168	0.732627	0.586301	0.86802	0.822222	0.910224	0.950062	0.875862	0.985626	0.910165	0.909664	0.864971	0.80819	0.914683
9	0.998404	0.925021	0.975022	0.9662	0.976651	0.973888	0.980707	0.933677	0.923754	0.986316	0.922849	0.965184	0.947984	0.888393	0.939799	0.895009	0.913043	0.952507	0.964	0.913124	0.923251	0.846154	0.660413	0.699438	0.906067	0.900735	0.851852	0.901566	0.897516	0.894459	0.854671	0.837302	0.794118	0.691839	0.900524	0.886139	0.751472	0.628767	0.903553	0.837037	0.907731	0.955056	0.87931	0.973306	0.900709	0.920168	0.847358	0.814655	0.920635
9.05	0.988029	0.923336	0.964318	0.962077	0.959742	0.975822	0.974277	0.904937	0.898338	0.958947	0.961424	0.957447	0.946684	0.909598	0.928094	0.915663	0.929535	0.915567	0.957333	0.918669	0.923251	0.907051	0.643527	0.707865	0.880626	0.933824	0.861953	0.903803	0.928571	0.94723	0.802768	0.793651	0.786765	0.707674	0.892147	0.880198	0.778563	0.628767	0.807107	0.837037	0.882793	0.928839	0.868966	0.950719	0.897163	0.869748	0.845401	0.8125	0.900794
9.1	0.972067	0.933446	0.970562	0.961253	0.964573	0.974855	0.974277	0.921887	0.914956	0.964211	0.925816	0.961315	0.954486	0.890625	0.928094	0.919105	0.923538	0.949868	0.957333	0.924214	0.911964	0.903846	0.628518	0.696629	0.880626	0.948529	0.905724	0.926174	0.975155	0.923483	0.844291	0.797619	0.798529	0.736906	0.924607	0.933663	0.840989	0.686301	0.908629	1	0.910224	0.941323	0.855172	0.960986	0.932624	0.880252	0.841487	0.806034	0.924603
9.15	0.976856	0.950295	0.971454	0.95878	0.969404	0.985493	0.968917	0.920413	0.924731	0.961053	0.997033	0.953578	0.945384	0.873884	0.953177	0.888124	0.938531	0.91029	0.945333	0.959335	0.916479	0.910256	0.590994	0.668539	0.880626	0.955882	0.868687	0.930649	0.947205	0.926121	0.83391	0.785714	0.804412	0.742996	0.926702	0.943564	0.811543	0.691781	0.86802	0.837037	0.865337	0.941323	0.889655	0.973306	0.950355	0.907563	0.837573	0.81681	0.94246
9.2	0.84996	0.983151	0.987511	0.976917	0.983092	0.922631	0.991426	0.927045	0.907136	0.992632	0.991098	0.969052	0.954486	0.873884	0.966555	0.895009	0.973013	0.941953	0.981333	0.957486	0.934537	0.958333	0.613508	0.676966	0.894325	0.952206	0.925926	0.948546	0.965839	0.963061	0.809689	0.77381	0.847059	0.758831	0.924607	0.924752	0.855124	0.742466	0.837563	0.866667	0.885287	0.933833	0.906897	0.979466	0.91844	0.888655	0.849315	0.810345	0.970238
9.25	0.955307	0.960404	0.983051	0.990932	0.990338	0.967118	0.979636	0.912307	0.908113	1	0.913947	0.947776	0.946684	0.841518	0.939799	0.862306	0.955022	0.915567	0.948	0.939002	0.945824	0.919872	0.594747	0.626404	0.878669	0.926471	0.83165	0.93736	0.925466	0.941953	0.83045	0.765873	0.835294	0.775883	0.926702	0.906931	0.879859	0.763014	0.781726	0.837037	0.895262	0.932584	0.875862	0.977413	0.931442	0.936975	0.855186	0.827586	0.968254
9.3	0.92099	0.943555	0.978591	0.985985	0.981481	0.957447	0.979636	0.90199	0.904203	0.955789	0.979228	0.974855	0.96749	0.848214	0.944816	0.908778	1	0.944591	0.964	0.981516	0.968397	0.923077	0.589118	0.629213	0.894325	0.943015	0.902357	0.95302	0.928571	0.98153	0.84083	0.81746	0.844118	0.795371	0.959162	0.924752	0.914016	0.809589	0.84264	0.933333	0.890274	0.94382	0.893103	1	0.93026	0.871849	0.835616	0.831897	0.980159
9.35	0.944134	0.969671	0.986619	0.998351	0.995974	1	0.980707	0.900516	0.892473	0.996842	0.922849	0.970986	0.955787	0.813616	0.948161	0.920826	0.965517	0.986807	0.996	0.953789	0.923251	0.923077	0.585366	0.587079	0.876712	0.928309	0.895623	0.946309	0.925466	0.965699	0.83391	0.809524	0.85	0.800244	0.95288	0.922772	0.904594	0.827397	0.837563	0.888889	0.890274	0.938826	0.903448	0.973306	0.945626	0.903361	0.833659	0.806034	0.998016
9.4	0.930567	0.958719	0.981267	0.991756	0.977456	0.968085	0.982851	0.890199	0.900293	0.967368	0.958457	0.965184	0.964889	0.824777	0.929766	0.879518	0.977511	0.891821	0.965333	0.970425	0.930023	0.891026	0.54409	0.578652	0.876712	0.908088	0.868687	0.919463	0.919255	0.957784	0.937716	0.821429	0.895588	0.817296	0.984293	0.973267	0.951708	0.886301	0.923858	0.903704	0.870324	0.93633	0.868966	0.973306	0.94208	0.901261	0.829746	0.803879	0.94246
9.45	0.920192	0.957877	0.986619	0.97197	0.978261	0.977756	0.958199	0.867354	0.879765	0.966316	0.94362	0.951644	0.953186	0.799107	0.939799	0.870912	0.968516	0.934037	0.962667	0.972274	0.89842	0.839744	0.536585	0.570225	0.845401	0.90625	0.828283	0.9217	0.860248	0.926121	0.889273	0.777778	0.869118	0.83313	0.967539	0.953465	0.944641	0.889041	0.847716	0.933333	0.875312	0.932584	0.906897	0.98152	0.951537	0.903361	0.841487	0.818966	0.946429
9.5	0.948923	1	0.997324	0.990932	0.993559	0.989362	0.95284	0.868828	0.871945	0.955789	0.937685	0.959381	0.954486	0.799107	0.909699	0.884682	0.937031	0.941953	0.958667	0.981516	0.911964	0.887821	0.553471	0.575843	0.853229	0.928309	0.858586	0.948546	0.940994	0.944591	0.958478	0.809524	0.894118	0.862363	0.946597	0.955446	0.956419	0.931507	0.852792	0.918519	0.877805	0.927591	0.872414	0.983573	0.929078	0.92437	0.827789	0.795259	0.972222
9.55	0.917797	0.973884	1	0.996702	0.995974	0.968085	0.993569	0.872513	0.8739	0.961053	0.940653	0.967118	0.945384	0.793527	0.924749	0.857143	0.976012	0.91029	0.958667	0.970425	0.871332	0.785256	0.5197	0.558989	0.829746	0.889706	0.875421	0.888143	0.878882	0.886544	0.920415	0.805556	0.879412	0.866017	0.963351	0.966337	0.959953	0.939726	0.888325	0.896296	0.850374	0.925094	0.9	0.954825	0.953901	0.888655	0.833659	0.806034	0.97619
9.6	0.924182	0.978939	0.983943	0.985161	0.977456	0.976789	0.979636	0.862196	0.860215	0.964211	0.952522	0.96325	0.959688	0.770089	0.939799	0.843373	0.965517	0.923483	0.954667	0.990758	0.934537	0.907051	0.562852	0.587079	0.831703	0.941176	0.888889	0.975391	0.965839	1	0.885813	0.761905	0.876471	0.846529	0.944503	0.936634	0.952886	0.909589	0.80203	0.866667	0.872818	0.908864	0.848276	0.98768	0.970449	0.905462	0.804305	0.771552	0.968254
9.65	0.907422	0.971356	1	0.990107	0.992754	0.974855	0.961415	0.845984	0.8739	0.934737	0.952522	0.96325	0.945384	0.758929	0.93311	0.862306	0.961019	0.939314	0.966667	0.981516	0.887133	0.830128	0.512195	0.530899	0.835616	0.873162	0.841751	0.903803	0.86646	0.894459	0.910035	0.77381	0.889706	0.876979	0.972775	0.966337	0.949352	0.928767	0.862944	0.822222	0.887781	0.93633	0.875862	0.989733	0.952719	0.92437	0.827789	0.810345	1
9.7	0.910615	0.978939	0.992864	0.982688	0.996779	0.971954	0.975348	0.827561	0.84262	0.946316	0.973294	0.96325	0.942783	0.751116	0.919732	0.864028	0.967016	0.968338	0.996	0.961183	0.887133	0.862179	0.5197	0.536517	0.810176	0.887868	0.861953	0.935123	0.906832	0.915567	0.951557	0.793651	0.901471	0.892814	1	0.989109	0.964664	0.953425	0.86802	0.866667	0.860349	0.916355	0.913793	0.969199	0.957447	0.880252	0.816047	0.786638	0.980159
9.75	0.905028	0.973884	0.990187	0.981039	0.994364	0.965184	0.978564	0.829035	0.839687	0.942105	0.940653	0.94971	0.918075	0.725446	0.928094	0.855422	0.970015	0.833773	0.909333	0.987061	0.889391	0.833333	0.499062	0.480337	0.796477	0.902574	0.868687	0.908277	0.897516	0.926121	0.906574	0.761905	0.892647	0.886724	0.969634	0.980198	0.954064	0.923288	0.812183	0.755556	0.872818	0.892634	0.855172	0.975359	0.977541	0.878151	0.818004	0.793103	0.94246
9.8	0.90822	0.975569	0.990187	0.981863	0.986312	0.975822	0.956056	0.817244	0.827957	0.956842	0.940653	0.961315	0.927178	0.712054	0.916388	0.858864	0.964018	0.899736	0.941333	0.985213	0.853273	0.798077	0.5197	0.497191	0.790607	0.878676	0.835017	0.872483	0.872671	0.85752	0.934256	0.718254	0.907353	0.897686	0.972775	0.939604	0.987044	0.919178	0.807107	0.822222	0.860349	0.917603	0.868966	0.956879	0.965721	0.903361	0.804305	0.8125	0.988095
9.85	0.901038	0.981466	0.994648	0.995878	1	0.969052	0.989282	0.816507	0.844575	0.974737	1	0.980658	0.924577	0.716518	0.944816	0.888124	0.973013	0.920844	0.929333	1	0.851016	0.769231	0.510319	0.491573	0.76908	0.849265	0.804714	0.879195	0.885093	0.891821	0.951557	0.785714	0.911765	0.91961	0.968586	0.966337	0.93404	0.923288	0.827411	0.733333	0.850374	0.890137	0.862069	0.98768	1	0.865546	0.798434	0.782328	0.978175
[truncated: 75 more columns]

## Sheet: Fig.1C (GSK+Menthol)
0	0.228645	0.103346	0.0146425	0.0562347	0.0636943	0.0988554	0.0200957	0.0614035	0.159509	0.127946	0.152659	0.0843155	0.0549542	0.0189732	0.0207254	0.0558912	0.172303	0.0855019	0.0352798	0.0362812	0	0.0132953	0.00278035	0	0	0.00110865	0.00904605	0.032735	0.00490798	0.010919	0.00856531	0	0.0153715	0.0409091	0	0.119919	0.117571	0.143757	0.296623	0	0.0240214	0.0311231	0.0311778	0.00906618	0	0.232383	0.00133333	0.0179076	0.0109622
0.05	0.235067	0.102362	0.0137812	0.0554197	0.0636943	0.0967742	0.0172249	0.0672515	0.176892	0.128788	0.162093	0.101541	0.0616153	0.0200893	0.0217617	0.060423	0.173913	0.086741	0.040146	0.037415	0.00502934	0.0104463	0.000926784	0.0128535	0.00302115	0	0.0139803	0.0116156	0.0208589	0.0154686	0.00856531	0.0141218	0.0196413	0.0420455	0.00529568	0.117886	0.102067	0.160546	0.342144	0.0214106	0.0177936	0.0460081	0.0369515	0.0145059	0.0010989	0.229866	0	0.0273327	0.0316687
0.1	0.183044	0.110236	0.0284238	0.0717196	0.0647558	0.155047	0.0239234	0.0692008	0.213701	0.159091	0.191252	0.0942883	0.0374688	0.0323661	0.0134715	0.0483384	0.183575	0.0768278	0.0389294	0.0464853	0.0569992	0.0180437	0.012975	0.0128535	0.0110775	0	0.0172697	0.0158395	0.00613497	0.022748	0.00963597	0.0176523	0.0128096	0.0431818	0.0167696	0.127033	0.107235	0.164743	0.353891	0.0459698	0.0258007	0.0622463	0.0357968	0.0145059	0.0131868	0.247483	0.012	0.0320452	0.0182704
0.15	0.219011	0.127953	0.042205	0.0855746	0.194268	0.283039	0.0296651	0.0964912	0.144172	0.167508	0.101201	0.0788758	0.0324729	0.0502232	0.0300518	0.0422961	0.170692	0.0978934	0.0291971	0.053288	0.045264	0.025641	0.0203892	0.0115681	0.0130916	0.00166297	0.0271382	0.0475185	0.0171779	0.0245678	0.01606	0.0123566	0.0187874	0.0488636	0.0300088	0.155488	0.108527	0.202518	0.395007	0.0617128	0.0311388	0.0703654	0.0496536	0.038078	0.0252747	0.260067	0.028	0.0377003	0.0267966
0.2	0.219011	0.107283	0.0335917	0.0692747	0.135881	0.275754	0.0267943	0.0779727	0.155419	0.127946	0.136364	0.155032	0.0324729	0.0200893	0.0196891	0.070997	0.204509	0.112763	0.0632603	0.0578231	0.0326907	0.0379867	0.0250232	0.0449871	0.0342397	0.00498891	0.0271382	0.0559662	0.0306748	0.0427662	0.0406852	0.0317741	0.0435525	0.0602273	0.015887	0.121951	0.103359	0.145855	0.314244	0.0724181	0.0284698	0.0635995	0.0450346	0.0217588	0.00989011	0.241611	0.0146667	0.0442978	0.0401949
0.25	0.218369	0.110236	0.0335917	0.0717196	0.130573	0.281998	0.0248804	0.0740741	0.153374	0.122054	0.139794	0.141432	0.0333056	0.0212054	0.0145078	0.0513595	0.181965	0.107807	0.0498783	0.0566893	0.0234702	0.0275404	0.021316	0.0385604	0.0382679	0.0116408	0.0222039	0.0200634	0.0208589	0.0300273	0.0267666	0.0379523	0.0461144	0.0443182	0.0167696	0.127033	0.112403	0.151102	0.311307	0.081864	0.0355872	0.0581867	0.0334873	0.0299184	0.0186813	0.244966	0.016	0.0358153	0.0377588
0.3	0.204881	0.100394	0.0258398	0.0684597	0.130573	0.290323	0.0287081	0.0750487	0.180982	0.111953	0.150943	0.135993	0.0249792	0.0167411	0.011399	0.0543807	0.21256	0.110285	0.0620438	0.0634921	0.0117351	0.0161443	0.00278035	0.0257069	0.0342397	0.00332594	0	0.0760296	0.0196319	0.010919	0.0139186	0.027361	0.00939368	0.0340909	0.0423654	0.158537	0.105943	0.167891	0.324523	0.100756	0.0418149	0.0852503	0.0577367	0.0453309	0.0461538	0.261745	0.0213333	0.0226202	0.0353228
0.35	0.206166	0.106299	0.0284238	0.0668297	0.124204	0.280957	0.0229665	0.0750487	0.150307	0.113636	0.145798	0.145059	0.0291424	0.0178571	0.0186528	0.0574018	0.198068	0.0966543	0.0559611	0.0555556	0.022632	0.0161443	0.0139018	0.0167095	0.0392749	0.0121951	0.0230263	0.0686378	0.0294479	0.0236579	0.0267666	0.0361871	0.029889	0.0375	0.0317741	0.130081	0.113695	0.149003	0.287812	0.108942	0.0382562	0.0811908	0.0496536	0.0290118	0.032967	0.258389	0.0146667	0.0226202	0.0292326
0.4	0.170199	0.11811	0.0318691	0.0464548	0.0477707	0.0811655	0.0267943	0.0448343	0.149284	0.275253	0.140652	0.164098	0.0574521	0.015625	0.00414508	0.0528701	0.114332	0.0855019	0.0231144	0.0510204	0.0293378	0.0237417	0.0250232	0.033419	0.0453172	0.0105322	0.0123355	0.0475185	0.0220859	0.0309372	0.0299786	0.043248	0.0273271	0.0397727	0.0450132	0.128049	0.117571	0.15425	0.264317	0.100756	0.0382562	0.0838972	0.056582	0.0271985	0.0351648	0.249161	0.032	0.0367578	0.0304507
0.45	0.116891	0.140748	0.0490956	0.0529747	0.0414013	0.0780437	0.0382775	0.0545809	0.173824	0.240741	0.151801	0.159565	0.0674438	0.0379464	0.015544	0.0634441	0.120773	0.0731103	0.0328467	0.0442177	0.0318525	0.0275404	0.0176089	0.00642674	0.0382679	0.0127494	0.00575658	0.0158395	0.0134969	0.0263876	0.0182013	0.043248	0.0222032	0.0409091	0.0353045	0.137195	0.114987	0.149003	0.237885	0.102015	0.0418149	0.0893099	0.0496536	0.0335449	0.0340659	0.240772	0.0173333	0.0320452	0.0182704
0.5	0.109184	0.128937	0.0439276	0.0472698	0.0498938	0.082206	0.0354067	0.0487329	0.158487	0.244108	0.155232	0.162285	0.0732723	0.0290179	0.0165803	0.0679758	0.120773	0.0780669	0.0304136	0.0430839	0.0586756	0.0379867	0.0222428	0.059126	0.0795569	0.0304878	0.0254934	0.0527983	0.0466258	0.0482257	0.0588865	0.0785525	0.0444065	0.0647727	0.0423654	0.129065	0.122739	0.145855	0.23348	0.110202	0.0480427	0.0852503	0.0554273	0.0262919	0.0395604	0.24245	0.0253333	0.0754006	0.043849
0.55	0.0989082	0.130906	0.0404823	0.0423798	0.0626327	0.0926119	0.0325359	0.045809	0.175869	0.236532	0.160377	0.137806	0.0707744	0.0279018	0.0103627	0.0800604	0.120773	0.0892193	0.0194647	0.053288	0.0444258	0.0275404	0.0101946	0.0218509	0.0574018	0.0282705	0.00575658	0.0559662	0.00858896	0.0263876	0.0267666	0.0794351	0.0204953	0.0409091	0.0414828	0.127033	0.120155	0.144806	0.239354	0.109572	0.0329181	0.082544	0.0600462	0.0217588	0.0318681	0.23406	0.0306667	0.0358153	0.00974421
0.6	0.104689	0.140748	0.0508183	0.0440098	0.0477707	0.0707596	0.0354067	0.0448343	0.176892	0.226431	0.153516	0.161378	0.0782681	0.0390625	0.0196891	0.0694864	0.119163	0.0904585	0.0340633	0.0566893	0.0662196	0.0322887	0.0398517	0.033419	0.0594159	0.0160754	0.0222039	0.0485744	0.0331288	0.0409463	0.0342612	0.0759047	0.0367208	0.0409091	0.0458959	0.136179	0.118863	0.135362	0.242291	0.115869	0.0364769	0.0933694	0.0600462	0.0344515	0.0483516	0.245805	0.036	0.0537229	0.0243605
0.65	0.0700064	0.108268	0.042205	0.0374898	0.0276008	0.0541103	0.0258373	0.0409357	0.213701	0.207071	0.197256	0.129646	0.0491257	0.0256696	0.00207254	0.0694864	0.128824	0.070632	0.0364964	0.0510204	0.0645432	0.031339	0.0222428	0.0411311	0.0694864	0.0249446	0.0238487	0.0348469	0.0269939	0.0327571	0.0364026	0.082083	0.0350128	0.0477273	0.0503089	0.128049	0.121447	0.10808	0.234949	0.127204	0.0462633	0.0852503	0.0531178	0.0253853	0.0461538	0.249161	0.044	0.0499529	0.0316687
0.7	0.109184	0.130906	0.0344531	0.0415648	0.0382166	0.0728408	0.0315789	0.042885	0.151329	0.239057	0.151801	0.141432	0.0682764	0.0301339	0.0196891	0.0619335	0.114332	0.0780669	0.0364964	0.0396825	0.0544845	0.02849	0.012975	0.0475578	0.0755287	0.02051	0.0148026	0.0549102	0.0208589	0.0291174	0.0331906	0.086496	0.028181	0.0488636	0.0458959	0.122967	0.102067	0.112277	0.229075	0.110831	0.0302491	0.0933694	0.0577367	0.0235721	0.0362637	0.239933	0.04	0.0490104	0.0243605
0.75	0.102762	0.128937	0.0387597	0.0488998	0.0360934	0.0738814	0.0344498	0.0448343	0.149284	0.238215	0.14837	0.150499	0.0674438	0.0345982	0.0279793	0.0619335	0.10789	0.0755886	0.0450122	0.0362812	0.0511316	0.0237417	0.0148285	0.0462725	0.0755287	0.0221729	0.015625	0.0538543	0.0147239	0.0245678	0.0246253	0.086496	0.028181	0.0420455	0.0476611	0.139228	0.109819	0.117524	0.243759	0.115869	0.0373665	0.100135	0.0600462	0.0362647	0.0527473	0.265101	0.06	0.0367578	0.0219245
0.8	0.0879897	0.129921	0.0335917	0.0374898	0.037155	0.0645161	0.0296651	0.045809	0.151329	0.227273	0.151801	0.146872	0.0582848	0.0334821	0.0207254	0.060423	0.10628	0.0731103	0.0437956	0.037415	0.0469405	0.0265907	0.0120482	0.0347044	0.0785498	0.0260532	0.0172697	0.0190074	0.0122699	0.022748	0.0214133	0.0873786	0.0222032	0.0352273	0.0538394	0.138211	0.111111	0.124869	0.254038	0.117758	0.0435943	0.110961	0.0762125	0.0389846	0.0582418	0.254195	0.068	0.0320452	0.0219245
0.85	0.0693642	0.120079	0.0327304	0.0399348	0.0435244	0.0676379	0.0267943	0.0497076	0.167689	0.204545	0.157804	0.138713	0.0582848	0.03125	0.0259067	0.0468278	0.10789	0.0718711	0.0498783	0.0453515	0.0477787	0.031339	0.0185357	0.0141388	0.0624371	0.0149667	0.00822368	0.0411827	0.00245399	0.0282075	0.00749465	0.0732568	0.00939368	0.0409091	0.054722	0.134146	0.118863	0.124869	0.258443	0.122796	0.044484	0.110961	0.0819861	0.0290118	0.0516484	0.253356	0.0586667	0.0329877	0.0182704
0.9	0.0751445	0.119094	0.0275624	0.0334148	0.0329087	0.0520291	0.0267943	0.0409357	0.147239	0.154882	0.142367	0.140526	0.0549542	0.0212054	0.0196891	0.0407855	0.101449	0.0656753	0.0340633	0.0362812	0.0494552	0.0265907	0.0194625	0.0372751	0.0876133	0.0277162	0.0189145	0.0718057	0.0122699	0.0254777	0.0267666	0.0988526	0.0230572	0.0375	0.0741395	0.163618	0.124031	0.1532	0.320117	0.133501	0.0649466	0.127199	0.0969977	0.049864	0.0758242	0.290268	0.096	0.0292177	0.0401949
0.95	0.118818	0.160433	0.081826	0.110024	0.0774947	0.243496	0.0325359	0.0974659	0.317996	0.274411	0.196398	0	0.0491257	0.0915179	0.0528497	0.0453172	0.0837359	0	0	0.0487528	0.0670578	0.022792	0.0185357	0.0488432	0.0956697	0.0304878	0.0328947	0.030623	0.0245399	0.0409463	0.0299786	0.109444	0.0358668	0.0420455	0.0414828	0.145325	0.0749354	0	0.22467	0.112091	0.0756228	0.037889	0.0277136	0.0262919	0.0637363	0.322987	0.0546667	0.0471254	0.0377588
1	0.130379	0.142717	0.0292851	0.0570497	0.261146	0.122789	0.0421053	0.111111	0.117587	0.159091	0.0506003	0.115141	0.0482931	0.0368304	0.0321244	0.0271903	0.132045	0.0916976	0.0291971	0.0351474	0.0536463	0.0446344	0.0435589	0.0475578	0.0986908	0.0388027	0.0411184	0.0443506	0.0478528	0.0436761	0.0417559	0.117387	0.0444065	0.0556818	0.0697264	0.150407	0.0710594	0.10703	0.245228	0.127204	0.0578292	0.127199	0.0981524	0.0389846	0.0835165	0.298658	0.0733333	0.0442978	0.0572473
1.05	0.0102762	0.0748031	0.0327304	0.0594947	0	0.140479	0.0229665	0.0633528	0.295501	0.223064	0.267581	0.139619	0	0.015625	0.00518135	0.0664653	0.109501	0.0384139	0.0231144	0.0680272	0.0536463	0.022792	0.0231696	0.0424165	0.0996979	0.0443459	0.0427632	0.030623	0.0233129	0.0291174	0.0396146	0.120035	0.0384287	0.0409091	0.0176523	0.123984	0.0736434	0.043022	0.217327	0.0976071	0.0462633	0.0595399	0.0357968	0.00181324	0.0208791	0.28104	0.0466667	0.0348728	0.0341048
1.1	0.277457	0.181102	0	0.0244499	0.0721868	0.292404	0.000956938	0.0185185	0	0	0	0.161378	0.0724396	0.0100446	0.00829016	0	0.099839	0.0954151	0.0559611	0.0113379	0.0477787	0.0265907	0.0176089	0.0308483	0.18429	0.0354767	0.0180921	0.0274551	0.0196319	0.0309372	0.0492505	0.115622	0.0213493	0.0306818	0.0503089	0.148374	0.0801034	0.0734523	0.240822	0.11398	0.0498221	0.0960758	0.0588915	0.0253853	0.0604396	0.302013	0.084	0.0273327	0.0280146
1.15	0.125241	0.143701	0.0292851	0.0334148	0.0329087	0.0468262	0.0200957	0.0331384	0.124744	0.127946	0.121784	0.158658	0.0907577	0.0267857	0.0186528	0.0422961	0.0821256	0.0582404	0.0255474	0.0260771	0.0611903	0.0275404	0.0176089	0.0231362	0.206445	0.0371397	0.0131579	0.0337909	0.0245399	0.0354868	0.0481799	0.11474	0.0145175	0.0352273	0.0529568	0.138211	0.0801034	0.0629591	0.201175	0.125945	0.0560498	0.0906631	0.0646651	0.0299184	0.0593407	0.287752	0.048	0.0320452	0.0255786
1.2	0.102762	0.137795	0.0404823	0.0317848	0.0318471	0.0447451	0.0296651	0.0350877	0.142127	0.133838	0.153516	0.154125	0.0957535	0.03125	0.0259067	0.0589124	0.0885668	0.0594796	0.0437956	0.0260771	0.0670578	0.019943	0.0111214	0.0321337	0.199396	0.036031	0.00822368	0.0549102	0.0134969	0.0282075	0.0471092	0.116505	0.0162254	0.0329545	0.0414828	0.132114	0.0671835	0.0493179	0.18649	0.112091	0.0569395	0.097429	0.0450346	0.0262919	0.0494505	0.286074	0.056	0.0320452	0.0182704
1.25	0.0937701	0.128937	0.0275624	0.0187449	0.0191083	0.0489074	0.0162679	0.0194932	0.139059	0.138047	0.137221	0.143246	0.0874271	0.015625	0.0145078	0.0287009	0.0660225	0.0607187	0.0328467	0.0260771	0.0645432	0.02849	0.0176089	0.0385604	0.190332	0.0421286	0.0106908	0.0517423	0.0233129	0.0409463	0.0556745	0.120918	0.0170794	0.0295455	0.0361871	0.0924797	0.0271318	0.130115	0.138032	0.0988665	0	0.152909	0.0923788	0	0.043956	0.207215	0.0226667	0.0367578	0.0255786
1.3	0.106615	0.0856299	0.0577089	0.0277099	0.230361	0.315297	0.0631579	0.0935673	0.231084	0.388047	0.172384	0.0235721	0.118235	0.0379464	0.065285	0.0483384	0.00805153	0.0346964	0.026764	0	0.0544845	0.0265907	0.0176089	0.0449871	0.188318	0.0465632	0.0213816	0.031679	0.0184049	0.0300273	0.0513919	0.133274	0.0239112	0.0318182	0.0564872	0.140244	0.109819	0.195173	0.330396	0.11272	0.0453737	0.146143	0.0692841	0.0362647	0.0692308	0.251678	0.1	0.0377003	0.0182704
1.35	0.104689	0.113189	0.0344531	0.0374898	0.029724	0.0686785	0.0143541	0.0292398	0.137014	0.153199	0.129503	0.13418	0.0641132	0.015625	0.0124352	0.0271903	0.0772947	0.0495663	0.0291971	0.0170068	0.0477787	0.0294397	0.0222428	0.029563	0.160121	0.0399113	0.0213816	0.0337909	0.0208589	0.0263876	0.0406852	0.127979	0.0187874	0.0522727	0.0564872	0.152439	0.130491	0.190976	0.323054	0.121537	0.047153	0.14885	0.0658199	0.0398912	0.0736264	0.269295	0.112	0.0395853	0.0170524
1.4	0.0976236	0.122047	0.037037	0.0391198	0.0360934	0.0593132	0.0220096	0.0350877	0.149284	0.202862	0.137221	0.168631	0.0674438	0.0212054	0.0134715	0.0407855	0.078905	0.0656753	0.0474453	0.0306122	0.0461023	0.0531814	0.021316	0.0501285	0.151057	0.0443459	0.0271382	0.0443506	0.0257669	0.0300273	0.0385439	0.141218	0.0239112	0.0875	0.0661959	0.150407	0.142119	0.187828	0.295154	0.122796	0.0524911	0.131258	0.0669746	0.0371714	0.0736264	0.266779	0.129333	0.0329877	0.0243605
1.45	0.100193	0.115157	0.0310078	0.0342298	0.0212314	0.0426639	0.0133971	0.0263158	0.138037	0.190236	0.126072	0.162285	0.0607827	0.0167411	0.00829016	0.0317221	0.0595813	0.0532838	0.0462287	0.0147392	0.0402347	0.048433	0.012975	0.0642674	0.149043	0.0576497	0.0222039	0.0211193	0.0245399	0.0200182	0.0513919	0.142101	0.0230572	0.0727273	0.0617829	0.14939	0.136951	0.188877	0.28047	0.119018	0.0578292	0.143437	0.0704388	0.0281052	0.0703297	0.25755	0.104	0.0480679	0.0280146
1.5	0.0989082	0.112205	0.0258398	0.0244499	0.0307856	0.0489074	0.0114833	0.0282651	0.138037	0.204545	0.12693	0.158658	0.0582848	0.015625	0.00829016	0.0332326	0.0644122	0.0520446	0.0474453	0.0170068	0.0410729	0.0417854	0.012975	0.0398458	0.131923	0.0487805	0.0123355	0.0200634	0.0184049	0.0181984	0.0256959	0.134157	0.0128096	0.0556818	0.0582524	0.14939	0.136951	0.190976	0.296623	0.116499	0.047153	0.133965	0.0600462	0.0326383	0.0703297	0.270134	0.105333	0.0358153	0.0207065
1.55	0.101477	0.122047	0.0284238	0.0277099	0.0307856	0.0478668	0.015311	0.0272904	0.143149	0.20202	0.123499	0.162285	0.0591174	0.0234375	0.0145078	0.0332326	0.0708535	0.0532838	0.0486618	0.021542	0.0393965	0.0303894	0.0222428	0.0424165	0.120846	0.0371397	0.0115132	0.0369588	0.0294479	0.0209281	0.0246253	0.132392	0.0102477	0.0318182	0.0635481	0.139228	0.142119	0.183631	0.279001	0.11398	0.0516014	0.14885	0.0658199	0.0326383	0.0692308	0.25755	0.106667	0.0358153	0.0243605
1.6	0.0931278	0.123031	0.0241171	0.0236349	0.0392781	0.0468262	0.0229665	0.0292398	0.148262	0.225589	0.120926	0.151405	0.0582848	0.0122768	0.00621762	0.0181269	0.0547504	0.063197	0.0620438	0.0306122	0.0343671	0.0123457	0.012975	0.0526992	0.132931	0.0532151	0.0115132	0.0380148	0.0184049	0.0136488	0.0364026	0.149162	0.0145175	0.0125	0.0564872	0.137195	0.126615	0.166842	0.270191	0.106423	0.044484	0.125846	0.0577367	0.0281052	0.0626374	0.263423	0.0986667	0.0273327	0.0182704
1.65	0.0995504	0.116142	0.0198105	0.0252649	0.0286624	0.0437045	0.0114833	0.0292398	0.138037	0.223064	0.120926	0.163191	0.0616153	0.0133929	0.0103627	0.0317221	0.0547504	0.0557621	0.0632603	0.021542	0.0519698	0.0265907	0.0194625	0.0565553	0.117825	0.0371397	0.0139803	0.0496304	0.0331288	0.0272975	0.0310493	0.139453	0.0162254	0.0295455	0.054722	0.154472	0.126615	0.189927	0.298091	0.0944584	0.0533808	0.155616	0.0692841	0.0435177	0.0637363	0.28104	0.126667	0.0395853	0.0280146
1.7	0.0905588	0.108268	0.0129199	0.0146699	0.0265393	0.0395421	0.00382775	0.0194932	0.132924	0.223064	0.108062	0.151405	0.0466278	0.00669643	0.00310881	0.00302115	0.0322061	0.0433705	0.0462287	0.00907029	0.0410729	0.0151947	0.0203892	0.0694087	0.12286	0.0421286	0.0164474	0.0348469	0.0417178	0.0200182	0.0385439	0.145631	0.0179334	0.0261364	0.0520741	0.145325	0.121447	0.190976	0.284875	0.0938287	0.0338078	0.121786	0.0508083	0.0271985	0.0593407	0.272651	0.0853333	0.0386428	0.0255786
1.75	0.0982659	0.120079	0.0232558	0.0277099	0.0382166	0.0561915	0.0143541	0.0360624	0.145194	0.23569	0.11235	0.162285	0.071607	0.0245536	0.0207254	0.0347432	0.0563607	0.0532838	0.0596107	0.0249433	0.022632	0.0104463	0.00926784	0.033419	0.0916415	0.0304878	0.00822368	0.0369588	0.0171779	0.00909918	0.0182013	0.123566	0.00170794	0.0113636	0.059135	0.132114	0.127907	0.192025	0.268722	0.102015	0.0346975	0.124493	0.0600462	0.0154125	0.0692308	0.259228	0.0893333	0.0103676	0.0109622
1.8	0.0950546	0.117126	0.0163652	0.0187449	0.0382166	0.0447451	0.0114833	0.0243665	0.135992	0.224747	0.113208	0.161378	0.0582848	0.0111607	0.0124352	0.0287009	0.0547504	0.0483271	0.0632603	0.015873	0.0234702	0	0.00278035	0.0231362	0.0835851	0.0282705	0.00164474	0.0443506	0.00858896	0.00636943	0.00963597	0.127096	0	0	0.043248	0.113821	0.111111	0.172088	0.277533	0.0913098	0.0240214	0.116373	0.051963	0.00906618	0.0384615	0.245805	0.08	0.0122526	0
1.85	0.0834939	0.107283	0.00861326	0.00977995	0.0392781	0.0489074	0.00287081	0.0253411	0.144172	0.23064	0.11235	0.152312	0.0457952	0.00223214	0	0.0135952	0.0499195	0.047088	0.0450122	0.0204082	0.0318525	0.0180437	0.0166821	0.0244216	0.06143	0.0282705	0.0115132	0.0211193	0.0184049	0.0172884	0.00749465	0.119153	0.00341588	0.0170455	0.0670786	0.14126	0.140827	0.195173	0.303965	0.11398	0.0427046	0.150203	0.0635104	0.0235721	0.0725275	0.269295	0.114667	0.0188501	0.0182704
1.9	0.0873475	0.11122	0.00947459	0.0171149	0.029724	0.0405827	0.00287081	0.0243665	0.141104	0.236532	0.114923	0.146872	0.0499584	0.00669643	0.00207254	0.0166163	0.0450886	0.0495663	0.0498783	0.015873	0.0360436	0.011396	0.02595	0.0411311	0.0704935	0.0299335	0.0238487	0.0179514	0.0269939	0.0163785	0.0171306	0.137688	0.0153715	0.0159091	0.0520741	0.144309	0.139535	0.20042	0.311307	0.112091	0.0524911	0.14885	0.0658199	0.0253853	0.0681319	0.265101	0.12	0.0273327	0.0243605
1.95	0.105331	0.125984	0.0258398	0.0105949	0.059448	0.069719	0.0239234	0.0253411	0.125767	0.138047	0.111492	0.156845	0.127394	0.0256696	0.0466321	0.0589124	0.0386473	0.0520446	0.0364964	0.00907029	0.00922045	0.0218424	0.0185357	0.0321337	0.040282	0.0476718	0.00986842	0	0	0.00454959	0.0224839	0.139453	0.00426985	0.00795455	0.0255958	0	0	0.376705	0.160059	0.100756	0.0186833	0.431664	0.247113	0.0589302	0.0318681	0	0.0453333	0	0.00609013
2	0.0873475	0.0984252	0.00861326	0	0	0.012487	0	0	0.158487	0.117003	0.120069	0.129646	0.103247	0	0.0207254	0.0060423	0	0.0458488	0.00973236	0.0136054	0.0268231	0.00949668	0.00463392	0.0128535	0.0453172	0.0221729	0.0123355	0.0179514	0.00736196	0.00818926	0.0107066	0.13504	0.00256191	0.0136364	0.038835	0.10874	0.102067	0.210913	0.196769	0.144836	0.0338078	0.20839	0.108545	0.0344515	0.0615385	0.188758	0.0533333	0.0141376	0.0121803
2.05	0.0867052	0.101378	0.0129199	0.00570497	0.0116773	0.0062435	0.000956938	0.00779727	0.142127	0.111953	0.126072	0.127833	0.0882598	0.0167411	0.0300518	0.0181269	0.0177134	0.0433705	0.0218978	0.00453515	0.030176	0.00664767	0.00926784	0.0141388	0.0493454	0.0094235	0.0123355	0.0559662	0.00736196	0.00545951	0.00963597	0.13857	0.00341588	0.0193182	0.0582524	0.121951	0.135659	0.24659	0.333333	0.149244	0.0498221	0.14479	0.100462	0.0253853	0.078022	0.248322	0.084	0.0122526	0.0146163
2.1	0.103404	0.115157	0.0189492	0.0122249	0.00955414	0	0.0143541	0.0175439	0.121677	0.122896	0.116638	0.174071	0.111574	0.0301339	0.0445596	0.0558912	0.0434783	0.047088	0.0364964	0.00680272	0.0243085	0.000949668	0	0.00771208	0.0392749	0.0260532	0.0139803	0.0200634	0.00858896	0.00636943	0	0.131509	0.00853971	0.0318182	0.0882613	0.135163	0.156331	0.229801	0.306902	0.170655	0.0542705	0.143437	0.116628	0.0226655	0.105495	0.265101	0.08	0.0122526	0.0170524
2.15	0.0989082	0.113189	0.0111972	0.0138549	0.0318471	0.0104058	0.0124402	0.0224172	0.133947	0.128788	0.120926	0.146872	0.0899251	0.015625	0.0279793	0.0438066	0.0354267	0.0483271	0.0255474	0.00680272	0.0192791	0.002849	0.00185357	0.00257069	0.0382679	0.0260532	0.00904605	0.0095037	0.00122699	0	0	0.135922	0.00341588	0.00681818	0.0670786	0.136179	0.139535	0.229801	0.346549	0.151134	0.044484	0.14479	0.113164	0.0172257	0.0824176	0.260067	0.1	0.00942507	0.0219245
2.2	0.100193	0.109252	0.00775194	0.00733496	0.022293	0.0062435	0.00574163	0.0146199	0.127812	0.12963	0.128645	0.149592	0.0774355	0.0167411	0.0186528	0.0317221	0.041868	0.039653	0.026764	0.00907029	0.0217938	0.00759734	0.00926784	0.0359897	0.0574018	0.0327051	0.0205592	0.0200634	0.0220859	0.0100091	0.0235546	0.154457	0.0162254	0.0125	0.0520741	0.118902	0.125323	0.217209	0.312775	0.144836	0.0364769	0.116373	0.0935335	0.00362647	0.0593407	0.261745	0.072	0.0169651	0.0414129
2.25	0.104689	0.106299	0.0129199	0.0154849	0.014862	0.0156087	0.00956938	0.0126706	0.134969	0.125421	0.127787	0.145966	0.0782681	0.015625	0.0279793	0.0302115	0.0660225	0.047088	0.0255474	0.0136054	0.0251467	0.00854701	0.0185357	0.0822622	0.06143	0.0315965	0.0230263	0.0179514	0.0257669	0.0127389	0.0321199	0.157988	0.0153715	0.0227273	0.0776699	0.147358	0.151163	0.228751	0.325991	0.171285	0.0507117	0.124493	0.10739	0.0344515	0.0967033	0.27349	0.08	0.0169651	0.0377588
2.3	0.1079	0.114173	0.0198105	0.0220049	0.044586	0.0218522	0.0162679	0.0253411	0.137014	0.11532	0.125214	0.135993	0.0749376	0.0223214	0.0373057	0.0302115	0.0950081	0.0731103	0.0437956	0.031746	0.0368818	0.014245	0.0240964	0.0796915	0.0906344	0.0266075	0.0238487	0.0221753	0.0257669	0.0254777	0.0406852	0.172992	0.0196413	0.0238636	0.0944395	0.226626	0.200258	0.135362	0.422907	0.189547	0.0871886	0	0	0.0172257	0.110989	0.474832	0.0986667	0.0235627	0.0304507
2.35	0.120745	0.11811	0.0335917	0.0268949	0.0477707	0.0197711	0.0114833	0.0204678	0.129857	0.103535	0.111492	0.155938	0.0932556	0.0301339	0.0476684	0.0574018	0.0917874	0.0669145	0.0437956	0.031746	0.03772	0.0379867	0.0435589	0.11054	0.10574	0.0476718	0.0460526	0.0369588	0.0478528	0.0309372	0.0674518	0.211827	0.0179334	0.0454545	0.0803177	0.154472	0.175711	0.343127	0.408223	0.169395	0.0524911	0.11908	0.103926	0.0326383	0.0835165	0.278523	0.113333	0.0263902	0.0523752
2.4	0	0	0.0344531	0.0643847	0.112527	0.0218522	0.0143541	0.0545809	0.312883	0.240741	0.198971	0.0834089	0.0308077	0.0323661	0.0362694	0.081571	0.109501	0.0879802	0.0827251	0.0748299	0.0486169	0.0474834	0.0574606	0.11054	0.126888	0.0443459	0.0822368	0.0464625	0.0601227	0.0318471	0.0952891	0.228597	0.0196413	0.0625	0.0917917	0.159553	0.183463	0.350472	0.38326	0.176952	0.0613879	0.132612	0.0889145	0.0634633	0.0835165	0.269295	0.126667	0.0311027	0.0535932
2.45	0.127168	0.137795	0.0645995	0.0619397	0.124204	0.105099	0.0220096	0.0341131	0.164622	0.154882	0.0960549	0.146872	0.0824313	0.0345982	0.0404145	0.0196375	0.112721	0.107807	0.0827251	0.0941043	0.0838223	0.0826211	0.081557	0.140103	0.147029	0.0742794	0.118421	0.0760296	0.103067	0.0527753	0.126338	0.266549	0.030743	0.0943182	0.11474	0.184959	0.206718	0.387198	0.408223	0.202771	0.0809609	0.146143	0.103926	0.0897552	0.105495	0.292785	0.158667	0.0565504	0.0767357
2.5	0.124599	0.140748	0.0663221	0.0847596	0.150743	0.105099	0.0191388	0.039961	0.186094	0.15404	0.116638	0.172257	0.115737	0.0412946	0.0621762	0.0770393	0.161031	0.13259	0.0863747	0.117914	0.0888516	0.0978158	0.0797034	0.12982	0.116818	0.0659645	0.130757	0.093981	0.106748	0.0418562	0.104925	0.269197	0.0631939	0.0897727	0.0803177	0.148374	0.200258	0.344176	0.356828	0.192065	0.0604982	0.136671	0.0727483	0.0625567	0.0538462	0.252517	0.141333	0.0499529	0.0755177
2.55	0.116249	0.139764	0.0714901	0.105949	0.174098	0.108221	0.0191388	0.0467836	0.184049	0.143098	0.132075	0.152312	0.109076	0.0401786	0.0601036	0.0528701	0.164251	0.14746	0.105839	0.126984	0.111484	0.127255	0.115848	0.164524	0.140987	0.0892461	0.154605	0.0718057	0.137423	0.0609645	0.150964	0.302736	0.125534	0.0977273	0.112974	0.179878	0.250646	0.386149	0.393539	0.224811	0.0987544	0.165088	0.115473	0.0924751	0.0989011	0.272651	0.169333	0.0716305	0.0950061
2.6	0.137444	0.150591	0.0697674	0.116544	0.217622	0.112383	0.0277512	0.0662768	0.189162	0.146465	0.139794	0.155938	0.131557	0.0558036	0.0683938	0.0770393	0.178744	0.163569	0.114355	0.143991	0.119028	0.144349	0.125116	0.160668	0.1571	0.119734	0.148849	0.0791975	0.132515	0.0764331	0.158458	0.320388	0.11614	0.103409	0.105031	0.176829	0.262274	0.359916	0.380323	0.224811	0.107651	0.139378	0.0969977	0.0761559	0.0813187	0.280201	0.164	0.0772856	0.0816078
2.65	0.143866	0.172244	0.081826	0.136104	0.235669	0.1436	0.0363636	0.0964912	0.189162	0.146465	0.14837	0.164098	0.139883	0.0725446	0.0756477	0.0936556	0.196457	0.188352	0.118005	0.15873	0.124895	0.146249	0.146432	0.152956	0.158107	0.129157	0.153783	0.111932	0.147239	0.0873521	0.162741	0.338041	0.111016	0.102273	0.1015	0.177846	0.26615	0.381952	0.38326	0.215365	0.11121	0.142084	0.122402	0.0888486	0.0824176	0.261745	0.2	0.0735156	0.0986602
2.7	0.168272	0.185039	0.0913006	0.162999	0.274947	0.169615	0.0507177	0.114035	0.192229	0.138889	0.14837	0.18223	0.15154	0.0959821	0.0932642	0.110272	0.196457	0.200743	0.126521	0.15873	0.134954	0.152896	0.15848	0.177378	0.18429	0.154656	0.167763	0.107709	0.168098	0.0855323	0.175589	0.375993	0.136635	0.1125	0.121801	0.194106	0.293282	0.397692	0.419971	0.222922	0.126335	0.132612	0.124711	0.0951949	0.0879121	0.286074	0.221333	0.0857681	0.114495
2.75	0.179191	0.193898	0.086994	0.152404	0.329087	0.184183	0.0574163	0.120858	0.215746	0.150673	0.172384	0.174977	0.15154	0.0970982	0.0880829	0.0966767	0.20934	0.216853	0.144769	0.162132	0.128248	0.14245	0.140871	0.178663	0.192346	0.166297	0.175164	0.116156	0.153374	0.0764331	0.159529	0.396293	0.149445	0.127273	0.173875	0.203252	0.29199	0.400839	0.43025	0.209698	0.122776	0.113667	0.118938	0.0951949	0.0967033	0.281879	0.241333	0.0942507	0.0962241
2.8	0.18754	0.21752	0.108527	0.165444	0.364119	0.197711	0.0727273	0.12963	0.229039	0.150673	0.178388	0.166818	0.178185	0.132812	0.110881	0.119335	0.227053	0.211896	0.158151	0.171202	0.120704	0.118708	0.137164	0.16581	0.190332	0.16796	0.184211	0.157339	0.15092	0.0709736	0.163812	0.398941	0.140051	0.119318	0.211827	0.221545	0.339793	0.389297	0.468429	0.223552	0.134342	0.120433	0.138568	0.0970082	0.105495	0.375839	0.288	0.0933082	0.103532
2.85	0.177906	0.233268	0.112834	0.157294	0.382166	0.19667	0.0669856	0.120858	0.222904	0.146465	0.17753	0.168631	0.182348	0.132812	0.111917	0.114804	0.244767	0.204461	0.141119	0.171202	0.153395	0.134853	0.151993	0.197943	0.197382	0.169069	0.208059	0.107709	0.170552	0.0928116	0.194861	0.44925	0.167378	0.134091	0.209179	0.20935	0.403101	0.364113	0.459618	0.224811	0.170819	0.136671	0.165127	0.0888486	0.101099	0.389262	0.341333	0.127238	0.142509
2.9	0.199101	0.251969	0.128338	0.176854	0.418259	0.208117	0.0880383	0.1423	0.240286	0.165825	0.183533	0.185857	0.199001	0.159598	0.133679	0.137462	0.225443	0.22057	0.188564	0.176871	0.166806	0.144349	0.156627	0.217224	0.182276	0.169069	0.200658	0.122492	0.160736	0.10737	0.206638	0.46955	0.175064	0.148864	0.198588	0.223577	0.394057	0.388248	0.480176	0.215365	0.16637	0.138024	0.146651	0.104261	0.103297	0.389262	0.330667	0.151744	0.148599
2.95	0.204239	0.271654	0.13006	0.174409	0.422505	0.19667	0.0832536	0.138402	0.241309	0.155724	0.188679	0.197643	0.194005	0.169643	0.136788	0.132931	0.239936	0.232962	0.181265	0.187075	0.162615	0.144349	0.152919	0.197943	0.182276	0.185698	0.189967	0.212249	0.16319	0.0982712	0.197002	0.492498	0.17848	0.138636	0.268314	0.236789	0.428941	0.378804	0.491924	0.224181	0.191281	0.170501	0.165127	0.109701	0.10989	0.397651	0.398667	0.138549	0.175396
3	0.209377	0.276575	0.146425	0.189894	0.455414	0.203954	0.0995215	0.154971	0.243354	0.170034	0.194683	0.204896	0.20816	0.180804	0.139896	0.148036	0.241546	0.25031	0.201946	0.189342	0.152557	0.134853	0.150139	0.18509	0.196375	0.194013	0.177632	0.218585	0.16319	0.0909918	0.205567	0.512798	0.177626	0.1375	0.226831	0.23374	0.475452	0.359916	0.468429	0.230479	0.203737	0.185386	0.176674	0.107888	0.107692	0.370805	0.442667	0.152686	0.19732
3.05	0.211304	0.287402	0.156761	0.189894	0.46603	0.192508	0.10622	0.153021	0.250511	0.174242	0.208405	0.210335	0.202331	0.195313	0.153368	0.152568	0.267311	0.275093	0.19708	0.208617	0.175189	0.139601	0.157553	0.160668	0.187311	0.18847	0.182566	0.181626	0.166871	0.101911	0.191649	0.555163	0.180188	0.151136	0.23301	0.287602	0.540052	0.377754	0.475771	0.267632	0.258007	0.219215	0.228637	0.13146	0.12967	0.375	0.512	0.192271	0.192448
3.1	0.213231	0.311024	0.16882	0.193969	0.464968	0.172737	0.110048	0.138402	0.257669	0.178451	0.207547	0.208522	0.202331	0.200893	0.151295	0.143505	0.246377	0.270136	0.198297	0.221088	0.160939	0.132953	0.138091	0.16581	0.208459	0.185698	0.178454	0.218585	0.165644	0.0973612	0.208779	0.570168	0.18275	0.145455	0.210944	0.283537	0.563307	0.365163	0.409692	0.245592	0.258897	0.215156	0.213626	0.124207	0.104396	0.350671	0.474667	0.194156	0.183922
3.15	0.193963	0.330709	0.19466	0.197229	0.47983	0.192508	0.122488	0.151072	0.252556	0.185185	0.204974	0.225748	0.218984	0.209821	0.168912	0.178248	0.26248	0.275093	0.183698	0.213152	0.166806	0.150997	0.149212	0.164524	0.226586	0.194013	0.180099	0.252376	0.176687	0.11101	0.207709	0.593116	0.185312	0.163636	0.225949	0.320122	0.611111	0.422875	0.427313	0.260076	0.314947	0.31935	0.233256	0.149592	0.125275	0.343121	0.497333	0.205467	0.193666
3.2	0.188182	0.325787	0.192937	0.197229	0.460722	0.175858	0.123445	0.136452	0.251534	0.171717	0.219554	0.239347	0.230641	0.207589	0.174093	0.196375	0.26409	0.277571	0.172749	0.201814	0.152557	0.145299	0.13253	0.147815	0.244713	0.193459	0.179276	0.199578	0.17546	0.101911	0.200214	0.579876	0.175064	0.1625	0.218888	0.370935	0.629199	0.43022	0.356828	0.27204	0.330071	0.2977	0.255196	0.142339	0.115385	0.375	0.428	0.199811	0.188794
3.25	0.191394	0.340551	0.211886	0.211084	0.507431	0.200832	0.136842	0.155945	0.270961	0.203704	0.22813	0.244787	0.238135	0.227679	0.187565	0.193353	0.26409	0.301115	0.189781	0.22449	0.140821	0.151947	0.134384	0.151671	0.258812	0.211197	0.176809	0.193242	0.164417	0.10646	0.211991	0.597529	0.180188	0.180682	0.21271	0.386179	0.634367	0.448059	0.340675	0.259446	0.33363	0.38295	0.284065	0.150499	0.110989	0.425336	0.374667	0.195099	0.19732
3.3	0.172768	0.357283	0.225668	0.219234	0.508493	0.194589	0.132057	0.161793	0.281186	0.199495	0.229846	0.25204	0.229808	0.252232	0.194819	0.197885	0.26409	0.283767	0.193431	0.210884	0.152557	0.17094	0.153846	0.152956	0.273917	0.216186	0.189967	0.248152	0.190184	0.11192	0.224839	0.619594	0.188728	0.198864	0.210944	0.368902	0.639535	0.458552	0.330396	0.261965	0.346085	0.391069	0.309469	0.162285	0.116484	0.407718	0.353333	0.219604	0.20341
3.35	0.175337	0.374016	0.218777	0.216789	0.497877	0.169615	0.127273	0.153021	0.277096	0.173401	0.235849	0.25748	0.226478	0.243304	0.203109	0.206949	0.259259	0.275093	0.203163	0.201814	0.146689	0.166192	0.142725	0.147815	0.27996	0.219512	0.172697	0.233369	0.191411	0.0973612	0.205567	0.60459	0.172502	0.244318	0.194175	0.348577	0.627907	0.463799	0.302496	0.256297	0.356762	0.410014	0.314088	0.163191	0.106593	0.401846	0.385333	0.203582	0.194884
3.4	0.156069	0.38878	0.248923	0.229014	0.524416	0.169615	0.145455	0.164717	0.294479	0.186027	0.252144	0.251133	0.228976	0.257813	0.210363	0.205438	0.267311	0.296159	0.223844	0.216553	0.162615	0.190883	0.140871	0.143959	0.294058	0.227827	0.183388	0.176346	0.211043	0.0955414	0.216274	0.636364	0.181896	0.264773	0.214475	0.355691	0.652455	0.498426	0.323054	0.252519	0.370996	0.447903	0.349885	0.188577	0.127473	0.401846	0.425333	0.212064	0.207065
3.45	0.168272	0.372047	0.247201	0.237164	0.529724	0.1436	0.143541	0.191033	0.310838	0.180135	0.262436	0.255666	0.234804	0.266741	0.209326	0.229607	0.297907	0.289963	0.251825	0.208617	0.16513	0.19943	0.147359	0.143959	0.306143	0.256098	0.198191	0.20169	0.215951	0.0991811	0.219486	0.650485	0.183604	0.2625	0.208297	0.363821	0.651163	0.497377	0.284875	0.236146	0.365658	0.420839	0.354503	0.174071	0.124176	0.391779	0.404	0.216777	0.205847
3.5	0.174053	0.369094	0.250646	0.233904	0.532909	0.154006	0.145455	0.197856	0.296524	0.176768	0.255575	0.259293	0.233972	0.266741	0.212435	0.220544	0.293076	0.282528	0.270073	0.217687	0.160101	0.221273	0.148285	0.143959	0.296073	0.257761	0.191612	0.197466	0.226994	0.100091	0.207709	0.637246	0.183604	0.260227	0.203001	0.367886	0.643411	0.525708	0.286344	0.243703	0.376335	0.454668	0.371824	0.19311	0.124176	0.393456	0.394667	0.235627	0.207065
3.55	0.189467	0.372047	0.24031	0.228199	0.508493	0.127992	0.137799	0.197856	0.302658	0.153199	0.25729	0.259293	0.231474	0.27567	0.207254	0.197885	0.281804	0.275093	0.293187	0.208617	0.170997	0.261159	0.152919	0.1491	0.315206	0.267738	0.20148	0.182682	0.230675	0.10646	0.205567	0.64519	0.187874	0.289773	0.209179	0.377033	0.644703	0.543547	0.273128	0.244332	0.411032	0.437077	0.394919	0.19311	0.12967	0.407718	0.405333	0.231857	0.211937
3.6	0.197174	0.379921	0.256675	0.244499	0.505308	0.130073	0.144498	0.211501	0.299591	0.151515	0.259863	0.271985	0.242298	0.289063	0.225907	0.234139	0.305958	0.277571	0.307786	0.21542	0.163453	0.25736	0.160334	0.143959	0.338369	0.289911	0.212171	0.217529	0.230675	0.0982712	0.208779	0.668138	0.195559	0.278409	0.202118	0.359756	0.643411	0.505771	0.239354	0.238665	0.41637	0.428958	0.394919	0.181324	0.116484	0.389262	0.430667	0.231857	0.209501
3.65	0.191394	0.384843	0.261843	0.242869	0.524416	0.137357	0.154067	0.220273	0.281186	0.15404	0.245283	0.261106	0.230641	0.289063	0.211399	0.220544	0.285024	0.273854	0.305353	0.221088	0.178541	0.251662	0.166821	0.173522	0.340383	0.313747	0.21875	0.161563	0.240491	0.121019	0.229122	0.699029	0.208369	0.278409	0.191527	0.35874	0.618863	0.528856	0.246696	0.231108	0.393238	0.447903	0.396074	0.186763	0.121978	0.386745	0.410667	0.263902	0.202192
3.7	0.199101	0.393701	0.263566	0.238794	0.526539	0.139438	0.151196	0.221248	0.268916	0.147306	0.240995	0.270172	0.23647	0.296875	0.21658	0.232628	0.289855	0.28005	0.29562	0.219955	0.160939	0.219373	0.151993	0.136247	0.325277	0.33592	0.203125	0.172122	0.231902	0.0973612	0.195931	0.696381	0.194705	0.264773	0.218005	0.414634	0.643411	0.56978	0.279001	0.25063	0.420819	0.487145	0.43418	0.226655	0.16044	0.430369	0.454667	0.246937	0.192448
3.75	0.193963	0.40748	0.274763	0.240424	0.537155	0.155047	0.155981	0.223197	0.260736	0.151515	0.222127	0.265639	0.241465	0.304688	0.227979	0.241692	0.31401	0.281289	0.306569	0.229025	0.151718	0.203229	0.139944	0.137532	0.319235	0.357539	0.209704	0.156283	0.229448	0.0946315	0.200214	0.713151	0.200683	0.238636	0.185349	0.365854	0.616279	0.514166	0.215859	0.226071	0.424377	0.496617	0.426097	0.19039	0.128571	0.393456	0.446667	0.247879	0.164434
3.8	0.188182	0.420276	0.286822	0.248574	0.545648	0.181061	0.173206	0.226121	0.262781	0.164141	0.214408	0.245694	0.250624	0.313616	0.233161	0.23716	0.307568	0.27881	0.323601	0.235828	0.16513	0.193732	0.144578	0.140103	0.299094	0.368071	0.223684	0.145723	0.230675	0.105551	0.188437	0.715799	0.196413	0.225	0.188879	0.36687	0.611111	0.493179	0.227606	0.22796	0.421708	0.511502	0.429561	0.168631	0.124176	0.401846	0.457333	0.275212	0.157125
3.85	0.214515	0.416339	0.283376	0.259984	0.523355	0.174818	0.162679	0.217349	0.275051	0.156566	0.213551	0.25476	0.264779	0.325893	0.243523	0.246224	0.312399	0.283767	0.333333	0.230159	0.166806	0.204179	0.151993	0.132391	0.29708	0.364191	0.216283	0.157339	0.233129	0.11101	0.174518	0.701677	0.186166	0.226136	0.181818	0.367886	0.605943	0.513116	0.217327	0.224181	0.424377	0.534506	0.446882	0.183137	0.127473	0.394295	0.452	0.271442	0.154689
3.9	0.213873	0.390748	0.285099	0.262429	0.535032	0.168574	0.169378	0.22807	0.274029	0.151515	0.209262	0.25204	0.25229	0.323661	0.237306	0.240181	0.320451	0.289963	0.356448	0.234694	0.171836	0.202279	0.151993	0.1491	0.314199	0.384146	0.23602	0.160507	0.251534	0.10737	0.203426	0.721977	0.196413	0.228409	0.195057	0.379065	0.630491	0.565582	0.245228	0.235516	0.429715	0.550744	0.467667	0.205802	0.141758	0.394295	0.473333	0.279925	0.168088
3.95	0.208735	0.377953	0.292851	0.263244	0.528662	0.150884	0.178947	0.22807	0.276074	0.151515	0.233276	0.210335	0.272273	0.333705	0.255959	0.219033	0.289855	0.297398	0.344282	0.230159	0.170159	0.204179	0.142725	0.150386	0.316213	0.395787	0.226151	0.19113	0.244172	0.105551	0.206638	0.733451	0.193851	0.226136	0.172992	0.357724	0.590439	0.543547	0.193833	0.215365	0.421708	0.529093	0.448037	0.168631	0.115385	0.386745	0.472	0.280867	0.153471
4	0.239563	0.38189	0.28596	0.267319	0.489384	0.138398	0.173206	0.226121	0.273006	0.12037	0.217839	0.228468	0.303913	0.327009	0.273575	0.229607	0.291465	0.306072	0.352798	0.240363	0.160101	0.202279	0.142725	0.136247	0.292044	0.388581	0.213816	0.161563	0.244172	0.101001	0.188437	0.721094	0.179334	0.226136	0.187996	0.376016	0.608527	0.534103	0.204112	0.220403	0.41548	0.512855	0.431871	0.181324	0.128571	0.39849	0.466667	0.262017	0.165652
4.05	0.231214	0.356299	0.286822	0.262429	0.522293	0.12487	0.180861	0.229045	0.288344	0.138047	0.238422	0.210335	0.305579	0.331473	0.26943	0.255287	0.31723	0.319703	0.355231	0.259637	0.173512	0.212726	0.151993	0.158098	0.309164	0.404656	0.224507	0.146779	0.260123	0.11374	0.207709	0.74316	0.18275	0.2375	0.159753	0.35061	0.585271	0.509969	0.199706	0.207179	0.403915	0.529093	0.448037	0.165005	0.107692	0.393456	0.469333	0.282752	0.174178
4.1	0.0892742	0.23622	0.265289	0.273839	0.510616	0.0905307	0.158852	0.24269	0.347648	0.162458	0.321612	0.214869	0.183181	0.340402	0.243523	0.277946	0.362319	0.314746	0.383212	0.232426	0.17435	0.216524	0.147359	0.152956	0.302115	0.429601	0.224507	0.154171	0.239264	0.11283	0.203426	0.749338	0.183604	0.219318	0.176523	0.36687	0.618863	0.52361	0.189427	0.221662	0.393238	0.529093	0.454965	0.191296	0.130769	0.380872	0.424	0.282752	0.168088
4.15	0.284522	0.454724	0.283376	0.252649	0.563694	0.198751	0.182775	0.232943	0.218814	0.118687	0.181818	0.232094	0.338052	0.339286	0.283938	0.232628	0.272142	0.315985	0.33455	0.243764	0.168483	0.209877	0.140871	0.151671	0.313192	0.43459	0.222039	0.143611	0.229448	0.10737	0.208779	0.760812	0.17848	0.210227	0.150044	0.336382	0.593023	0.539349	0.192364	0.20466	0.376335	0.529093	0.446882	0.168631	0.103297	0.345638	0.398667	0.276155	0.163216
4.2	0.252408	0.589567	0.325581	0.247759	0.690021	0.218522	0.23445	0.246589	0.121677	0.103535	0.0960549	0.214869	0.441299	0.325893	0.294301	0.291541	0.26409	0.340768	0.319951	0.282313	0.162615	0.20133	0.146432	0.1491	0.310171	0.449002	0.220395	0.142555	0.233129	0.10828	0.201285	0.744042	0.160547	0.203409	0.162401	0.356707	0.629199	0.524659	0.192364	0.209068	0.400356	0.512855	0.463048	0.172257	0.128571	0.383389	0.442667	0.265787	0.168088
4.25	0.278099	0.36122	0.268734	0.282804	0.547771	0.183143	0.18756	0.19883	0.290389	0.18266	0.252144	0.244787	0.44796	0.367188	0.370984	0.265861	0.257649	0.335812	0.318735	0.22449	0.175189	0.196581	0.133457	0.160668	0.330312	0.471175	0.203947	0.134108	0.228221	0.123749	0.207709	0.753751	0.146029	0.196591	0.167696	0.371951	0.622739	0.499475	0.195301	0.20466	0.404804	0.500677	0.446882	0.18495	0.134066	0.406879	0.452	0.282752	0.169306
4.3	0.278741	0.399606	0.254953	0.277914	0.525478	0.17898	0.176077	0.170565	0.310838	0.201178	0.258148	0.235721	0.472107	0.379464	0.373057	0.238671	0.228663	0.333333	0.282238	0.235828	0.162615	0.204179	0.13253	0.145244	0.299094	0.452328	0.236842	0.151003	0.239264	0.118289	0.19379	0.729921	0.170794	0.2125	0.173875	0.364837	0.647287	0.442812	0.187959	0.205919	0.437722	0.523681	0.474596	0.19039	0.13956	0.404362	0.46	0.27804	0.164434
4.35	0.233141	0.42126	0.228252	0.245314	0.474522	0.0770031	0.154067	0.202729	0.295501	0.170034	0.229846	0.265639	0.321399	0.335938	0.282902	0.220544	0.247987	0.288724	0.290754	0.195011	0.169321	0.194682	0.12975	0.155527	0.303122	0.459534	0.226974	0.128828	0.240491	0.11556	0.208779	0.72639	0.171648	0.194318	0.157988	0.362805	0.621447	0.428122	0.18649	0.197733	0.449288	0.550744	0.484988	0.185857	0.121978	0.393456	0.433333	0.284637	0.154689
4.4	0.226718	0.441929	0.242894	0.254279	0.537155	0.112383	0.179904	0.217349	0.280164	0.141414	0.232419	0.221215	0.350541	0.345982	0.291192	0.256798	0.252818	0.317224	0.301703	0.230159	0.151718	0.190883	0.134384	0.14653	0.302115	0.468958	0.226151	0.139388	0.247853	0.118289	0.207709	0.723742	0.161401	0.188636	0.163283	0.355691	0.625323	0.434418	0.174743	0.203401	0.467972	0.56157	0.513857	0.194016	0.128571	0.377517	0.414667	0.27427	0.165652
4.45	0.224791	0.408465	0.236865	0.246944	0.522293	0.109261	0.168421	0.203704	0.263804	0.138889	0.223842	0.210335	0.34055	0.334821	0.27772	0.23565	0.230274	0.30855	0.288321	0.207483	0.167645	0.194682	0.149212	0.173522	0.316213	0.5	0.238487	0.217529	0.257669	0.141037	0.217345	0.744925	0.16994	0.202273	0.153575	0.351626	0.627907	0.436516	0.173275	0.188917	0.457295	0.556157	0.51963	0.184044	0.128571	0.378356	0.416	0.295005	0.192448
4.5	0.224149	0.397638	0.239449	0.249389	0.526539	0.106139	0.168421	0.208577	0.270961	0.132997	0.232419	0.214869	0.354704	0.334821	0.287047	0.256798	0.236715	0.317224	0.282238	0.212018	0.177703	0.209877	0.15848	0.192802	0.313192	0.488914	0.239309	0.192186	0.272393	0.145587	0.223769	0.741395	0.170794	0.223864	0.194175	0.364837	0.644703	0.464848	0.190896	0.219773	0.466192	0.571042	0.520785	0.215775	0.162637	0.39094	0.442667	0.32328	0.209501
4.55	0.245986	0.356299	0.224806	0.238794	0.484076	0.0936524	0.16555	0.197856	0.264826	0.130471	0.221269	0.208522	0.355537	0.319196	0.275648	0.243202	0.220612	0.297398	0.270073	0.205215	0.162615	0.189934	0.141798	0.16838	0.288016	0.491131	0.240954	0.134108	0.255215	0.121019	0.213062	0.735216	0.190436	0.198864	0.156222	0.364837	0.657623	0.44596	0.171806	0.197103	0.484875	0.549391	0.515012	0.192203	0.135165	0.401846	0.442667	0.29689	0.181486
4.6	0.258831	0.364173	0.224806	0.246944	0.5138	0.10718	0.174163	0.221248	0.242331	0.132997	0.233276	0.219402	0.358868	0.329241	0.289119	0.26284	0.246377	0.314746	0.288321	0.219955	0.151718	0.196581	0.134384	0.164524	0.283988	0.495011	0.226974	0.147835	0.244172	0.117379	0.20985	0.740512	0.16994	0.225	0.147396	0.343496	0.617571	0.407135	0.151248	0.188287	0.47331	0.534506	0.491917	0.184044	0.123077	0.386745	0.426667	0.287465	0.163216
4.65	0.325626	0.351378	0.195521	0.222494	0.481953	0.113424	0.154067	0.205653	0.257669	0.131313	0.220412	0.238441	0.382182	0.297991	0.274611	0.26435	0.21095	0.299876	0.265207	0.210884	0.158424	0.225071	0.128823	0.178663	0.284995	0.498891	0.237664	0.153115	0.253988	0.11283	0.215203	0.749338	0.175064	0.257955	0.141218	0.324187	0.621447	0.396642	0.142438	0.18136	0.429715	0.556157	0.513857	0.186763	0.10989	0.371644	0.404	0.310085	0.170524
4.7	0.367373	0.436024	0.221361	0.220864	0.451168	0.0915713	0.157895	0.194932	0.222904	0.117003	0.183533	0.218495	0.440466	0.31808	0.304663	0.256798	0.196457	0.297398	0.248175	0.208617	0.147527	0.211776	0.125116	0.16838	0.278953	0.509424	0.227796	0.142555	0.251534	0.10646	0.206638	0.749338	0.172502	0.235227	0.157988	0.357724	0.624031	0.416579	0.162996	0.193955	0.475089	0.576455	0.523095	0.197643	0.127473	0.419463	0.452	0.302545	0.165652
4.75	0.464997	0.311024	0.20758	0.257539	0.438429	0.172737	0.167464	0.164717	0.327198	0.190236	0.272727	0.271985	0.578684	0.367188	0.413472	0.247734	0.21256	0.322181	0.238443	0.229025	0.157586	0.216524	0.128823	0.16581	0.267875	0.519401	0.23273	0.179514	0.255215	0.1101	0.207709	0.759929	0.171648	0.240909	0.148279	0.317073	0.613695	0.406086	0.123348	0.190176	0.446619	0.552097	0.517321	0.176791	0.124176	0.389262	0.412	0.302545	0.17296
4.8	0.428388	0.267717	0.180879	0.232274	0.392781	0.170656	0.146411	0.140351	0.328221	0.177609	0.281304	0.264733	0.562864	0.330357	0.388601	0.244713	0.217391	0.306072	0.199513	0.193878	0.147527	0.188984	0.123262	0.192802	0.274924	0.532151	0.220395	0.161563	0.260123	0.100091	0.224839	0.761695	0.157131	0.205682	0.13857	0.333333	0.605943	0.413431	0.151248	0.175693	0.462633	0.548038	0.510393	0.18223	0.128571	0.416107	0.442667	0.30443	0.157125
4.85	0.432241	0.25	0.169681	0.226569	0.380042	0.167534	0.134928	0.133528	0.348671	0.180135	0.288165	0.256573	0.559534	0.328125	0.384456	0.246224	0.201288	0.297398	0.184915	0.207483	0.150042	0.190883	0.121409	0.199229	0.263847	0.542129	0.235197	0.139388	0.284663	0.11101	0.221627	0.762577	0.167378	0.211364	0.151809	0.347561	0.622739	0.424974	0.145374	0.178212	0.483986	0.560217	0.54157	0.185857	0.132967	0.412752	0.434667	0.312912	0.181486
4.9	0.458574	0.253937	0.174849	0.229829	0.378981	0.17794	0.146411	0.138402	0.341513	0.175926	0.284734	0.263826	0.577852	0.339286	0.401036	0.247734	0.215781	0.309789	0.195864	0.20068	0.147527	0.195632	0.122335	0.18509	0.249748	0.53714	0.235197	0.145723	0.290798	0.11556	0.220557	0.752868	0.157985	0.197727	0.174757	0.365854	0.647287	0.465897	0.18649	0.198992	0.506228	0.608931	0.569284	0.215775	0.152747	0.427852	0.457333	0.303487	0.210719
4.95	0.452152	0.250984	0.169681	0.222494	0.354565	0.158169	0.14067	0.139376	0.346626	0.166667	0.287307	0.261106	0.56453	0.332589	0.393782	0.232628	0.223833	0.29368	0.193431	0.202948	0.139983	0.180437	0.115848	0.173522	0.229607	0.547672	0.219572	0.140444	0.268712	0.1101	0.20985	0.752868	0.146029	0.192045	0.147396	0.344512	0.614987	0.424974	0.152717	0.173804	0.496441	0.562923	0.546189	0.197643	0.12967	0.39849	0.446667	0.295947	0.190012
5	0.455363	0.247047	0.173988	0.233904	0.343949	0.14256	0.134928	0.135478	0.349693	0.156566	0.280446	0.262013	0.577019	0.329241	0.402073	0.238671	0.21256	0.283767	0.178832	0.19161	0.145851	0.185185	0.115848	0.190231	0.225579	0.556541	0.226974	0.128828	0.269939	0.11283	0.214133	0.752868	0.154569	0.194318	0.135922	0.333333	0.613695	0.412382	0.145374	0.167506	0.477758	0.55751	0.560046	0.18767	0.131868	0.368289	0.413333	0.299717	0.19732
5.05	0.462428	0.23622	0.164513	0.231459	0.343949	0.149844	0.133971	0.124756	0.360941	0.157407	0.277015	0.262919	0.568693	0.330357	0.394819	0.240181	0.202899	0.289963	0.182482	0.205215	0.143336	0.189934	0.112141	0.197943	0.199396	0.559313	0.225329	0.138332	0.247853	0.1101	0.203426	0.736099	0.146029	0.1875	0.139453	0.343496	0.624031	0.411333	0.157122	0.168766	0.496441	0.564276	0.562356	0.197643	0.134066	0.379195	0.436	0.295947	0.199756
5.1	0.46307	0.233268	0.172265	0.229829	0.328025	0.140479	0.136842	0.12768	0.352761	0.152357	0.256432	0.247507	0.56786	0.322545	0.396891	0.216012	0.1562	0.27881	0.181265	0.180272	0.133277	0.179487	0.111214	0.205656	0.197382	0.567073	0.217928	0.128828	0.240491	0.11101	0.211991	0.736981	0.138343	0.1875	0.126214	0.307927	0.620155	0.362015	0.116006	0.160579	0.498221	0.552097	0.52194	0.160471	0.114286	0.345638	0.437333	0.286522	0.193666
5.15	0.455363	0.234252	0.173988	0.216789	0.332272	0.139438	0.127273	0.112086	0.357873	0.144781	0.285592	0.261106	0.557036	0.316964	0.388601	0.223565	0.177134	0.273854	0.186131	0.180272	0.132439	0.179487	0.0991659	0.187661	0.17422	0.554878	0.208882	0.131996	0.239264	0.10919	0.190578	0.72639	0.135781	0.2	0.134157	0.333333	0.603359	0.420776	0.15859	0.163098	0.495552	0.573748	0.540416	0.188577	0.128571	0.375	0.452	0.283695	0.186358
5.2	0.414258	0.21752	0.164513	0.216789	0.315287	0.121748	0.111962	0.105263	0.362986	0.145623	0.2753	0.233001	0.52373	0.297991	0.357513	0.196375	0.169082	0.267658	0.164234	0.179138	0.12741	0.190883	0.111214	0.188946	0.160121	0.56541	0.211349	0.134108	0.23681	0.10646	0.204497	0.731686	0.143467	0.204545	0.115622	0.316057	0.602067	0.370409	0.118943	0.15869	0.47331	0.565629	0.556582	0.18223	0.11978	0.35906	0.430667	0.287465	0.188794
5.25	0.44316	0.218504	0.161068	0.220049	0.312102	0.0936524	0.114833	0.105263	0.347648	0.132997	0.265009	0.237534	0.527061	0.3125	0.373057	0.202417	0.161031	0.270136	0.193431	0.166667	0.120704	0.174739	0.0963855	0.16581	0.1571	0.567627	0.194901	0.108765	0.222086	0.0937216	0.19379	0.721094	0.12895	0.189773	0.113857	0.307927	0.611111	0.346275	0.0881057	0.163728	0.461744	0.525034	0.54157	0.178604	0.115385	0.353188	0.38	0.272385	0.158343
5.3	0.417469	0.225394	0.150732	0.210269	0.308917	0.0832466	0.104306	0.107212	0.344581	0.138047	0.254717	0.219402	0.510408	0.294643	0.357513	0.185801	0.149758	0.267658	0.190998	0.171202	0.131601	0.188034	0.110287	0.20437	0.159114	0.572062	0.214638	0.119324	0.255215	0.1101	0.203426	0.729921	0.144321	0.213636	0.117387	0.324187	0.624031	0.372508	0.143906	0.147355	0.484875	0.566982	0.555427	0.183137	0.126374	0.376678	0.445333	0.299717	0.186358
5.35	0.439306	0.190945	0.161929	0.218419	0.300425	0.094693	0.111962	0.117934	0.359918	0.143098	0.263293	0.216682	0.531224	0.296875	0.365803	0.196375	0.165862	0.277571	0.193431	0.181406	0.130763	0.180437	0.1038	0.187661	0.140987	0.576497	0.211349	0.112988	0.241718	0.103731	0.188437	0.724625	0.134073	0.2	0.124448	0.337398	0.604651	0.388248	0.118943	0.154912	0.485765	0.560217	0.560046	0.19039	0.142857	0.374161	0.433333	0.295005	0.181486
5.4	0.452152	0.198819	0.149871	0.203749	0.307856	0.0863684	0.104306	0.115984	0.333333	0.133838	0.246998	0.215775	0.530391	0.280134	0.366839	0.191843	0.151369	0.257745	0.170316	0.170068	0.117351	0.175689	0.0973123	0.164524	0.135952	0.583149	0.198191	0.104541	0.21227	0.0946315	0.171306	0.710503	0.122118	0.179545	0.126214	0.333333	0.599483	0.396642	0.126285	0.157431	0.476868	0.573748	0.558891	0.186763	0.140659	0.366611	0.416	0.278982	0.17296
5.45	0.439306	0.199803	0.145564	0.193969	0.286624	0.069719	0.103349	0.102339	0.328221	0.128788	0.253002	0.194016	0.510408	0.280134	0.349223	0.178248	0.161031	0.252788	0.1618	0.174603	0.129925	0.181387	0.114921	0.183805	0.132931	0.567073	0.212993	0.127772	0.220859	0.11374	0.187366	0.708738	0.125534	0.189773	0.128861	0.352642	0.622739	0.414481	0.148311	0.156171	0.50089	0.581867	0.558891	0.199456	0.142857	0.393456	0.437333	0.28935	0.181486
5.5	0.430957	0.226378	0.167959	0.210269	0.302548	0.0842872	0.119617	0.11501	0.317996	0.131313	0.247856	0.219402	0.542881	0.299107	0.376166	0.203927	0.167472	0.247831	0.170316	0.172336	0.12741	0.180437	0.108434	0.181234	0.132931	0.583149	0.224507	0.124604	0.217178	0.11192	0.185225	0.718447	0.133219	0.180682	0.117387	0.330285	0.612403	0.370409	0.0983847	0.149244	0.475089	0.554804	0.554273	0.185857	0.136264	0.357383	0.385333	0.291235	0.170524
5.55	0.412974	0.195866	0.136951	0.192339	0.260085	0.0520291	0.0985646	0.0945419	0.316973	0.119529	0.265009	0.196736	0.517069	0.270089	0.34715	0.188822	0.149758	0.225527	0.143552	0.156463	0.125733	0.17189	0.101946	0.192802	0.124874	0.582594	0.220395	0.162619	0.225767	0.104641	0.198073	0.720212	0.12468	0.180682	0.102383	0.319106	0.609819	0.360965	0.0983847	0.143577	0.493772	0.539919	0.54388	0.174977	0.11978	0.363255	0.412	0.287465	0.17905
5.6	0.398844	0.188976	0.14298	0.192339	0.265393	0.0645161	0.0947368	0.0984405	0.317996	0.124579	0.251286	0.180417	0.508743	0.266741	0.340933	0.163142	0.135266	0.231722	0.138686	0.156463	0.125733	0.187085	0.10658	0.177378	0.107754	0.56153	0.199836	0.12566	0.198773	0.11374	0.172377	0.684907	0.114432	0.184091	0.112974	0.345528	0.586563	0.388248	0.133627	0.141688	0.494662	0.556157	0.539261	0.203083	0.141758	0.373322	0.409333	0.286522	0.183922
5.65	0.393064	0.201772	0.149009	0.197229	0.259023	0.0686785	0.108134	0.107212	0.324131	0.126263	0.248714	0.174071	0.493755	0.277902	0.33886	0.173716	0.141707	0.237918	0.154501	0.157596	0.112322	0.175689	0.0982391	0.197943	0.115811	0.58204	0.194901	0.112988	0.209816	0.101911	0.204497	0.728155	0.12041	0.189773	0.137688	0.349593	0.609819	0.38405	0.13069	0.163728	0.475979	0.550744	0.553118	0.207616	0.162637	0.379195	0.394667	0.287465	0.17296
5.7	0.391137	0.193898	0.146425	0.195599	0.251592	0.0645161	0.101435	0.0935673	0.308793	0.118687	0.237564	0.183137	0.502082	0.25	0.33886	0.178248	0.133655	0.226766	0.139903	0.15873	0.121542	0.17094	0.104727	0.18509	0.11279	0.576497	0.20148	0.101373	0.202454	0.105551	0.189507	0.712268	0.126388	0.175	0.106796	0.321138	0.598191	0.351522	0.105727	0.139798	0.459075	0.510149	0.524249	0.180417	0.116484	0.366611	0.381333	0.290292	0.163216
5.75	0.440591	0.15748	0.13609	0.197229	0.225053	0.0811655	0.0966507	0.079922	0.321063	0.118687	0.246998	0.17951	0.500416	0.235491	0.336788	0.15861	0.135266	0.223048	0.127737	0.163265	0.112322	0.169041	0.0908248	0.196658	0.118832	0.587583	0.199013	0.0971489	0.195092	0.0964513	0.210921	0.706973	0.123826	0.179545	0.111209	0.333333	0.577519	0.38405	0.120411	0.141688	0.44484	0.522327	0.524249	0.194016	0.130769	0.36745	0.370667	0.287465	0.152253
5.8	0.442518	0.145669	0.13609	0.196414	0.219745	0.094693	0.0937799	0.082846	0.334356	0.121212	0.243568	0.171351	0.50458	0.225446	0.345078	0.166163	0.127214	0.216853	0.120438	0.157596	0.122381	0.179487	0.1038	0.190231	0.0986908	0.568182	0.208882	0.105597	0.213497	0.10919	0.203426	0.70256	0.142613	0.190909	0.086496	0.322154	0.55168	0.355719	0.12188	0.117128	0.455516	0.510149	0.530023	0.180417	0.110989	0.377517	0.386667	0.295947	0.164434
5.85	0.44316	0.144685	0.140396	0.203749	0.194268	0.0842872	0.0851675	0.0701754	0.314928	0.109428	0.226415	0.171351	0.489592	0.22433	0.340933	0.155589	0.10789	0.2057	0.110706	0.145125	0.107293	0.163343	0.0926784	0.191517	0.106747	0.573171	0.193257	0.0876452	0.184049	0.0900819	0.199143	0.691086	0.119556	0.178409	0.0944395	0.322154	0.564599	0.347324	0.111601	0.119647	0.424377	0.508796	0.496536	0.172257	0.108791	0.369966	0.365333	0.269557	0.142509
5.9	0.454721	0.141732	0.142119	0.204564	0.211253	0.0894901	0.0937799	0.0808967	0.320041	0.112795	0.225557	0.18223	0.506245	0.232143	0.350259	0.169184	0.133655	0.214374	0.122871	0.14966	0.118189	0.173789	0.10658	0.209512	0.121853	0.585366	0.199836	0.0876452	0.206135	0.10828	0.217345	0.713151	0.129804	0.188636	0.0803177	0.302846	0.560724	0.343127	0.0939794	0.110202	0.424377	0.476319	0.469977	0.166818	0.0989011	0.352349	0.352	0.299717	0.151035
5.95	0.456005	0.125984	0.130922	0.199674	0.200637	0.0915713	0.0803828	0.0847953	0.322086	0.112795	0.240137	0.198549	0.493755	0.222098	0.349223	0.18429	0.146538	0.215613	0.136253	0.14966	0.114837	0.161443	0.0889713	0.172237	0.0966767	0.562084	0.193257	0.0791975	0.184049	0.0946315	0.192719	0.690203	0.11187	0.177273	0.0776699	0.305894	0.572351	0.316894	0.0881057	0.111461	0.409253	0.466847	0.466513	0.165911	0.1	0.353188	0.328	0.283695	0.138855
6	0.451509	0.103346	0.125754	0.193154	0.185775	0.0926119	0.0755981	0.0818713	0.322086	0.11532	0.233276	0.186763	0.488759	0.198661	0.335751	0.167674	0.135266	0.213135	0.124088	0.146259	0.128248	0.173789	0.0926784	0.155527	0.0946626	0.574279	0.177632	0.0834213	0.182822	0.100091	0.180942	0.691968	0.1076	0.1875	0.09797	0.319106	0.589147	0.336831	0.0954479	0.131612	0.399466	0.485792	0.505774	0.173164	0.130769	0.355705	0.312	0.280867	0.140073
6.05	0.457932	0.101378	0.130922	0.189894	0.187898	0.109261	0.076555	0.0711501	0.309816	0.111953	0.22813	0.18223	0.4796	0.202009	0.337824	0.160121	0.112721	0.214374	0.108273	0.141723	0.142498	0.176638	0.0991659	0.169666	0.0886203	0.56153	0.178454	0.0887012	0.192638	0.104641	0.178801	0.687555	0.104184	0.217045	0.0997352	0.332317	0.599483	0.332634	0.0954479	0.141688	0.427046	0.480379	0.505774	0.184044	0.132967	0.395973	0.353333	0.298775	0.153471
6.1	0.458574	0.107283	0.120586	0.198044	0.138004	0.0395421	0.0698565	0.0555556	0.320041	0.0993266	0.22813	0.219402	0.491257	0.217634	0.352332	0.167674	0.114332	0.219331	0.135036	0.137188	0.139145	0.185185	0.0963855	0.172237	0.0896274	0.557095	0.181743	0.0781415	0.186503	0.104641	0.179872	0.673433	0.1076	0.276136	0.0953222	0.333333	0.586563	0.330535	0.117474	0.122796	0.41726	0.487145	0.497691	0.176791	0.121978	0.386745	0.344	0.279925	0.148599
6.15	0.480411	0.0728346	0.11025	0.193969	0.165605	0.105099	0.062201	0.0516569	0.306748	0.109428	0.2247	0.215775	0.508743	0.185268	0.346114	0.181269	0.119163	0.201983	0.0985401	0.134921	0.119028	0.178538	0.0926784	0.163239	0.0855992	0.554324	0.17352	0.0749736	0.190184	0.0991811	0.186296	0.677846	0.11614	0.259091	0.0882613	0.327236	0.55814	0.328437	0.0983847	0.117758	0.401246	0.474966	0.481524	0.174071	0.116484	0.380872	0.333333	0.28181	0.141291
6.2	0.479769	0.0787402	0.121447	0.204564	0.164544	0.125911	0.0717703	0.0526316	0.297546	0.114478	0.232419	0.199456	0.514571	0.191964	0.356477	0.182779	0.111111	0.198265	0.0924574	0.136054	0.114837	0.17284	0.0908248	0.16581	0.0906344	0.552661	0.185855	0.0728617	0.188957	0.0973612	0.183084	0.679612	0.122972	0.243182	0.0794351	0.304878	0.573643	0.283316	0.0690162	0.117128	0.393238	0.416779	0.452656	0.161378	0.108791	0.357383	0.3	0.280867	0.135201
6.25	0.481696	0.0777559	0.120586	0.211084	0.16242	0.135276	0.0755981	0.0604288	0.295501	0.124579	0.233276	0.203083	0.518734	0.191964	0.364767	0.187311	0.123994	0.206939	0.0973236	0.143991	0.126572	0.169991	0.0954588	0.177378	0.0795569	0.563747	0.190789	0.0570222	0.177914	0.101911	0.180942	0.676081	0.119556	0.2	0.0723742	0.288618	0.541344	0.301154	0.061674	0.101385	0.376335	0.403248	0.461894	0.154125	0.101099	0.354027	0.274667	0.284637	0.132765
6.3	0.459859	0.0570866	0.102498	0.193969	0.145435	0.116545	0.0602871	0.045809	0.282209	0.109428	0.208405	0.191296	0.49209	0.176339	0.340933	0.148036	0.0821256	0.203222	0.0875912	0.12585	0.107293	0.160494	0.0889713	0.164524	0.0725076	0.549889	0.174342	0.0760296	0.170552	0.0982712	0.168094	0.653133	0.102477	0.176136	0.0829656	0.328252	0.578811	0.311647	0.0939794	0.111461	0.408363	0.433018	0.479215	0.176791	0.115385	0.374161	0.292	0.259189	0.130329
6.35	0.464997	0.0629921	0.0981912	0.199674	0.141189	0.108221	0.0602871	0.037037	0.285276	0.118687	0.220412	0.188577	0.494588	0.174107	0.340933	0.160121	0.101449	0.204461	0.0875912	0.131519	0.0963956	0.160494	0.0824838	0.136247	0.0745217	0.551552	0.171053	0.0517423	0.160736	0.0964513	0.165953	0.651368	0.105038	0.168182	0.0723742	0.314024	0.568475	0.296957	0.0631424	0.107053	0.369217	0.403248	0.461894	0.162285	0.104396	0.361577	0.274667	0.255419	0.125457
6.4	0.449583	0.0561024	0.0981912	0.189079	0.129512	0.105099	0.045933	0.0341131	0.273006	0.110269	0.213551	0.191296	0.469609	0.165179	0.331606	0.154079	0.099839	0.197026	0.0778589	0.123583	0.104778	0.162393	0.0926784	0.167095	0.0835851	0.56929	0.180099	0.0739176	0.195092	0.11192	0.170236	0.667255	0.125534	0.177273	0.0917917	0.325203	0.568475	0.303253	0.082232	0.115869	0.380783	0.431664	0.473441	0.177697	0.11978	0.370805	0.288	0.271442	0.146163
6.45	0.425819	0.0570866	0.101637	0.186634	0.13482	0.0978148	0.0478469	0.042885	0.253579	0.112795	0.202401	0.186763	0.471274	0.154018	0.323316	0.149547	0.0885668	0.179678	0.0583942	0.113379	0.0963956	0.159544	0.0898981	0.140103	0.0574018	0.544346	0.162829	0.0718057	0.173006	0.103731	0.158458	0.640777	0.109308	0.173864	0.0873786	0.327236	0.594315	0.298006	0.0734214	0.11272	0.378114	0.405954	0.476905	0.174071	0.112088	0.375	0.269333	0.258247	0.132765
6.5	0.446371	0.0501969	0.0904393	0.190709	0.10828	0.0853278	0.0526316	0.0380117	0.283231	0.116162	0.210978	0.181324	0.468776	0.162946	0.337824	0.143505	0.0933977	0.180917	0.0632603	0.123583	0.0880134	0.151947	0.0778499	0.131105	0.0594159	0.552106	0.157072	0.0549102	0.170552	0.0973612	0.1606	0.638129	0.110162	0.164773	0.0803177	0.313008	0.559432	0.289612	0.0748899	0.11398	0.359431	0.403248	0.461894	0.170444	0.116484	0.369128	0.265333	0.242224	0.136419
6.55	0.455363	0.0570866	0.0973299	0.190709	0.10828	0.0790843	0.0526316	0.0321637	0.269939	0.104377	0.21012	0.189483	0.480433	0.166295	0.337824	0.15861	0.0982287	0.173482	0.0474453	0.114512	0.0846605	0.151947	0.0704356	0.131105	0.0533736	0.547118	0.15625	0.0601901	0.165644	0.0864422	0.154176	0.64519	0.1076	0.163636	0.0750221	0.308943	0.55814	0.278069	0.0646109	0.100756	0.370996	0.407307	0.465358	0.165911	0.112088	0.380872	0.276	0.248822	0.123021
6.6	0.435453	0.0610236	0.0921619	0.198859	0.118896	0.0842872	0.0497608	0.0350877	0.276074	0.122054	0.208405	0.18495	0.475437	0.166295	0.332642	0.148036	0.0885668	0.184634	0.0583942	0.11678	0.0804694	0.147198	0.0787766	0.125964	0.0523666	0.552661	0.147204	0.0496304	0.171779	0.0864422	0.157388	0.635481	0.10333	0.156818	0.0759047	0.310976	0.540052	0.268625	0.0690162	0.0982368	0.367438	0.400541	0.444573	0.170444	0.108791	0.372483	0.242667	0.240339	0.112058
6.65	0.42903	0.0659449	0.109388	0.197229	0.117834	0.074922	0.0583732	0.0341131	0.267894	0.123737	0.207547	0.188577	0.467943	0.168527	0.336788	0.137462	0.0901771	0.185874	0.0596107	0.115646	0.0821459	0.150047	0.0843373	0.131105	0.0443102	0.553769	0.158717	0.0527983	0.173006	0.101001	0.152034	0.623124	0.108454	0.169318	0.0873786	0.308943	0.55814	0.262329	0.0587372	0.108942	0.346085	0.359946	0.450346	0.173164	0.118681	0.364933	0.237333	0.245052	0.124239
6.7	0.416185	0.0639764	0.119724	0.210269	0.129512	0.103018	0.0717703	0.0487329	0.265849	0.137205	0.203259	0.183137	0.444629	0.166295	0.33057	0.137462	0.0756844	0.178439	0.0559611	0.11678	0.0905281	0.163343	0.0852641	0.150386	0.0634441	0.565965	0.152138	0.0527983	0.17546	0.101001	0.167024	0.635481	0.108454	0.178409	0.0697264	0.295732	0.524548	0.247639	0.0440529	0.0843829	0.351423	0.362652	0.445727	0.159565	0.107692	0.364933	0.222667	0.262017	0.113276
6.75	0.447013	0.0669291	0.121447	0.217604	0.13482	0.101977	0.0679426	0.0516569	0.269939	0.143939	0.213551	0.198549	0.474604	0.180804	0.335751	0.154079	0.0821256	0.19083	0.0681265	0.119048	0.0779547	0.1434	0.0704356	0.154242	0.0745217	0.577605	0.166118	0.0538543	0.180368	0.0973612	0.171306	0.654898	0.121264	0.153409	0.0714916	0.305894	0.546512	0.226653	0.0484581	0.0938287	0.350534	0.34912	0.43418	0.167724	0.106593	0.375	0.22	0.245052	0.114495
6.8	0.418754	0.0669291	0.134367	0.215159	0.131635	0.106139	0.0736842	0.0516569	0.268916	0.154882	0.209262	0.186763	0.453789	0.170759	0.33057	0.138973	0.0805153	0.173482	0.0608273	0.121315	0.0771165	0.149098	0.0769231	0.128535	0.0422961	0.56153	0.148026	0.0369588	0.154601	0.102821	0.154176	0.621359	0.104184	0.152273	0.0723742	0.313008	0.520672	0.244491	0.0602056	0.0944584	0.33452	0.354533	0.444573	0.170444	0.106593	0.36745	0.222667	0.239397	0.101096
6.85	0.434811	0.0738189	0.144703	0.223309	0.124204	0.0936524	0.0794258	0.0584795	0.266871	0.167508	0.20669	0.183137	0.455454	0.18192	0.334715	0.128399	0.0724638	0.1772	0.0571776	0.124717	0.0670578	0.1415	0.0676552	0.125964	0.0503525	0.567627	0.141447	0.0411827	0.144785	0.0846224	0.152034	0.614298	0.105892	0.147727	0.0644307	0.297764	0.533592	0.241343	0.0469897	0.0831234	0.335409	0.341001	0.442263	0.161378	0.107692	0.362416	0.204	0.227144	0.090134
6.9	0.440591	0.0688976	0.128338	0.214344	0.118896	0.0905307	0.0736842	0.0487329	0.271984	0.177609	0.212693	0.194016	0.456286	0.172991	0.328497	0.13142	0.0756844	0.19083	0.0632603	0.132653	0.071249	0.144349	0.0704356	0.141388	0.0463243	0.56929	0.161184	0.0348469	0.158282	0.0919017	0.167024	0.610768	0.117848	0.1625	0.0538394	0.299797	0.514212	0.240294	0.0572687	0.0780856	0.346085	0.345061	0.454965	0.162285	0.0956044	0.369966	0.210667	0.235627	0.101096
6.95	0.440591	0.0787402	0.13609	0.237164	0.109342	0.0884495	0.0870813	0.0389864	0.283231	0.165825	0.218696	0.24116	0.458784	0.171875	0.350259	0.169184	0.10789	0.218092	0.0888078	0.141723	0.0829841	0.150997	0.0843373	0.151671	0.0513595	0.560976	0.154605	0.0359029	0.165644	0.105551	0.163812	0.616946	0.1076	0.163636	0.0688438	0.311992	0.521964	0.204617	0.0367107	0.0919395	0.317616	0.317997	0.439954	0.166818	0.107692	0.386745	0.185333	0.243167	0.10475
7	0.829801	0.42126	0.659776	0.752241	0.561571	0.520291	0.577033	0.490253	0.52045	0.642256	0.297599	0.513146	0.726062	0.741071	0.769948	0.389728	0.259259	0.598513	0.472019	0.395692	0.0880134	0.157645	0.0852641	0.14653	0.040282	0.566519	0.161184	0.0390707	0.171779	0.0982712	0.163812	0.615181	0.105038	0.188636	0.0767873	0.29878	0.515504	0.213012	0	0.106423	0.285587	0.332882	0.481524	0.174977	0.117582	0.363255	0.153333	0.240339	0.105968
7.05	1	0.581693	0.827735	0.920945	0.781316	0.721124	0.800957	0.752437	0.820041	0.900673	0.578902	0.614687	0.932556	0.960937	1	0.634441	0.460548	0.788104	0.805353	0.537415	0.0729254	0.152896	0.068582	0.131105	0.040282	0.562084	0.161184	0.0190074	0.159509	0.0909918	0.157388	0.606355	0.117848	0.209091	0.0661959	0.323171	0.531008	0.259182	0.082232	0.0812343	0.353203	0.361299	0.475751	0.178604	0.115385	0.390101	0.218667	0.225259	0.0876979
7.1	0.875401	0.874016	0.994832	0.95273	0.954352	0.860562	0.925359	0.897661	0.761759	0.942761	0.712693	0.93019	0.97169	0.97433	0.988601	0.827795	0.719807	0.885998	0.908759	0.678005	0.0846605	0.178538	0.0880445	0.143959	0.0543807	0.560421	0.17023	0.032735	0.180368	0.0991811	0.165953	0.610768	0.12468	0.259091	0.059135	0.303862	0.549096	0.24554	0.0293686	0.0887909	0.329181	0.358593	0.486143	0.168631	0.105495	0.358221	0.193333	0.245994	0.114495
7.15	0.90045	0.937992	1	0.986145	0.988323	0.904266	0.984689	0.954191	0.807771	0.978114	0.827616	0.99184	1	1	0.995855	0.935045	0.855072	0.947955	0.985401	0.748299	0.128248	0.223172	0.162187	0.215938	0.131923	0.575388	0.212993	0.118268	0.251534	0.144677	0.203426	0.655781	0.159693	0.313636	0.059135	0.297764	0.576227	0.358867	0.0807636	0.0774559	0.317616	0.416779	0.476905	0.156845	0.114286	0.306208	0.194667	0.278982	0.175396
7.2	0.879897	0.955709	0.978467	0.989405	0.989384	0.919875	0.983732	0.982456	0.843558	1	0.890223	1	0.977519	0.987723	0.951295	0.954683	0.929147	0.971499	0.997567	0.780045	0.176027	0.25831	0.221501	0.27635	0.215509	0.590909	0.26727	0.269271	0.310429	0.193813	0.251606	0.675199	0.215201	0.322727	0.0759047	0.340447	0.657623	0.418678	0.108664	0.104534	0.418149	0.453315	0.488453	0.174977	0.118681	0.349832	0.310667	0.307257	0.257004
7.25	0.883751	0.982283	0.96727	1	1	0.912591	1	1	0.874233	0.978114	0.930532	0.999093	0.978351	0.987723	0.920207	1	0.985507	0.987608	1	0.828798	0.215423	0.283001	0.267841	0.299486	0.293051	0.634701	0.288651	0.360084	0.337423	0.216561	0.265525	0.696381	0.247652	0.331818	0.0997352	0.357724	0.686047	0.467996	0.110132	0.130353	0.442171	0.481732	0.494226	0.189483	0.132967	0.364933	0.368	0.318567	0.295981
7.3	0.849711	0.937008	0.884582	0.951915	0.957537	0.906348	0.95311	0.949318	0.877301	0.942761	0.937393	0.928377	0.923397	0.929688	0.831088	0.971299	0.971014	0.977695	0.965937	0.826531	0.284996	0.361823	0.338276	0.361183	0.374622	0.679601	0.337171	0.435058	0.398773	0.272975	0.328694	0.748455	0.296328	0.4	0.142101	0.402439	0.735142	0.537251	0.136564	0.185768	0.505338	0.537212	0.540416	0.245694	0.158242	0.383389	0.424	0.37606	0.367844
7.35	0.81246	0.902559	0.803618	0.90383	0.922505	0.866805	0.926316	0.917154	0.872188	0.902357	0.904803	0.895739	0.89592	0.861607	0.772021	0.959215	0.950081	0.947955	0.924574	0.816327	0.315172	0.384615	0.367933	0.410026	0.415911	0.707871	0.379112	0.468849	0.425767	0.287534	0.392934	0.779347	0.338173	0.420455	0.153575	0.387195	0.760982	0.515215	0.129222	0.220403	0.523132	0.56157	0.548499	0.244787	0.147253	0.378356	0.449333	0.392083	0.388551
7.4	0.797688	0.915354	0.778639	0.874491	0.922505	0.861602	0.915789	0.896686	0.878323	0.871212	0.918525	0.877607	0.895087	0.857143	0.743005	0.980363	0.969404	0.946716	0.923358	0.837868	0.347863	0.412156	0.393883	0.44473	0.487412	0.759978	0.413651	0.480465	0.440491	0.305732	0.426124	0.813769	0.382579	0.442045	0.201236	0.41565	0.780362	0.583421	0.157122	0.285894	0.531139	0.564276	0.556582	0.300091	0.179121	0.39094	0.464	0.393968	0.411693
7.45	0.767502	0.894685	0.740741	0.848411	0.902335	0.83871	0.885167	0.866472	0.870143	0.841751	0.912521	0.847688	0.849292	0.8125	0.694301	0.945619	0.938808	0.933086	0.903893	0.834467	0.401509	0.454891	0.433735	0.482005	0.522659	0.773836	0.452303	0.512144	0.487117	0.343039	0.448608	0.817299	0.421008	0.4875	0.241836	0.447154	0.817829	0.585519	0.202643	0.331234	0.566726	0.604871	0.56351	0.32185	0.196703	0.428691	0.504	0.426956	0.455542
7.5	0.743096	0.877953	0.71404	0.813366	0.904459	0.827263	0.896651	0.861598	0.867076	0.808923	0.903945	0.825929	0.841799	0.792411	0.679793	0.932024	0.927536	0.921933	0.879562	0.834467	0.413244	0.480532	0.461538	0.51671	0.556898	0.800443	0.472039	0.522703	0.49816	0.348499	0.482869	0.834951	0.448335	0.489773	0.267432	0.458333	0.852713	0.624344	0.242291	0.372796	0.588078	0.644114	0.579677	0.363554	0.228571	0.455537	0.516	0.440151	0.471376
7.55	0.725112	0.892717	0.708872	0.801141	0.914013	0.829344	0.896651	0.868421	0.871166	0.780303	0.907376	0.81505	0.830142	0.801339	0.660104	0.938066	0.940419	0.939281	0.900243	0.862812	0.449288	0.518519	0.496756	0.53856	0.596173	0.808204	0.499178	0.548046	0.530061	0.385805	0.507495	0.869373	0.478224	0.532955	0.299206	0.473577	0.857881	0.627492	0.259912	0.413098	0.603203	0.673884	0.602771	0.396192	0.258242	0.493289	0.552	0.463713	0.498173
7.6	0.698137	0.885827	0.711456	0.798696	0.897028	0.807492	0.879426	0.837232	0.883436	0.762626	0.899657	0.811423	0.800167	0.783482	0.636269	0.907855	0.925926	0.930607	0.883212	0.856009	0.481978	0.549858	0.52734	0.568123	0.642497	0.827051	0.527961	0.559662	0.547239	0.417652	0.546039	0.865843	0.508967	0.556818	0.338923	0.507114	0.877261	0.648478	0.320117	0.459698	0.643238	0.696888	0.621247	0.422484	0.297802	0.521812	0.6	0.477851	0.526188
7.65	0.662813	0.886811	0.723514	0.783211	0.882166	0.815817	0.862201	0.833333	0.876278	0.728956	0.88422	0.772439	0.771857	0.766741	0.614508	0.862538	0.877617	0.904585	0.845499	0.846939	0.498743	0.577398	0.544949	0.592545	0.655589	0.839246	0.541118	0.56811	0.564417	0.434031	0.561028	0.893204	0.542272	0.579545	0.364519	0.504065	0.890181	0.627492	0.315712	0.479849	0.643238	0.694181	0.627021	0.421578	0.312088	0.519295	0.585333	0.500471	0.540804
7.7	0.63648	0.897638	0.740741	0.809291	0.882166	0.831426	0.885167	0.846979	0.889571	0.741582	0.899657	0.775159	0.741049	0.765625	0.610363	0.867069	0.887279	0.929368	0.856448	0.878685	0.52808	0.603989	0.584801	0.616967	0.664653	0.854213	0.559211	0.570222	0.58773	0.474977	0.579229	0.913504	0.567037	0.603409	0.389232	0.550813	0.890181	0.674711	0.365639	0.489924	0.66637	0.713126	0.644342	0.461469	0.332967	0.553691	0.62	0.531574	0.548112
7.75	0.622351	0.908465	0.765719	0.811736	0.897028	0.866805	0.882297	0.85575	0.90184	0.731481	0.926244	0.788758	0.755204	0.785714	0.614508	0.900302	0.917874	0.923172	0.861314	0.887755	0.536463	0.622032	0.584801	0.622108	0.679758	0.860865	0.578125	0.587117	0.601227	0.480437	0.595289	0.903795	0.574722	0.621591	0.426302	0.555894	0.897933	0.665268	0.377386	0.52204	0.66637	0.729364	0.650115	0.472348	0.364835	0.560403	0.633333	0.544769	0.565164
7.8	0.584457	0.897638	0.760551	0.807661	0.895966	0.83871	0.867943	0.85575	0.90184	0.719697	0.927101	0.783318	0.726894	0.770089	0.595855	0.86858	0.909823	0.925651	0.858881	0.886621	0.558256	0.667616	0.607044	0.636247	0.697885	0.883592	0.594572	0.609293	0.623313	0.518653	0.626338	0.911739	0.586678	0.676136	0.444837	0.568089	0.901809	0.657922	0.378855	0.536524	0.687722	0.719892	0.632794	0.485947	0.365934	0.565436	0.612	0.573044	0.590743
7.85	0.591522	0.908465	0.780362	0.828851	0.893843	0.853278	0.8689	0.846979	0.92638	0.714646	0.927959	0.803264	0.729392	0.787946	0.615544	0.889728	0.925926	0.934325	0.86618	0.905896	0.576697	0.697056	0.63392	0.663239	0.717019	0.884146	0.618421	0.639916	0.644172	0.537762	0.650964	0.925861	0.612297	0.690909	0.508385	0.613821	0.94832	0.711438	0.434655	0.574937	0.712633	0.751015	0.696305	0.518586	0.428571	0.602349	0.625333	0.590952	0.62363
7.9	0.588953	0.90748	0.789836	0.826406	0.904459	0.850156	0.880383	0.861598	0.91002	0.712121	0.927101	0.829556	0.74771	0.794643	0.61658	0.891239	0.906602	0.939281	0.867397	0.882086	0.602682	0.708452	0.640408	0.70437	0.747231	0.881929	0.632401	0.629356	0.672393	0.566879	0.684154	0.9391	0.626815	0.710227	0.541924	0.74187	1	0.526758	0.415565	0.566121	1	0.603518	0.561201	0.456029	0.453846	0.972315	1	0.62771	0.646772
7.95	0.586384	0.937008	0.808786	0.850041	0.942675	0.874089	0.920574	0.898635	0.940695	0.723064	0.979417	0.845875	0.74771	0.815848	0.634197	0.936556	0.967794	0.959108	0.903893	0.927438	0.614417	0.739791	0.669138	0.694087	0.730111	0.894678	0.635691	0.655755	0.676074	0.582348	0.680942	0.931156	0.631085	0.715909	0.534863	0.614837	0.912145	0.781742	0.521292	0.588161	0.653025	0.797023	0.750577	0.576609	0.464835	0.57802	0.594667	0.637135	0.644336
8	0.585742	0.908465	0.799311	0.837816	0.928875	0.890739	0.905263	0.878168	0.94274	0.73064	0.950257	0.838622	0.74438	0.800223	0.621762	0.904834	0.929147	0.957869	0.873479	0.930839	0.634535	0.744539	0.670065	0.712082	0.761329	0.922395	0.648026	0.671595	0.689571	0.605096	0.706638	0.951456	0.656704	0.731818	0.568402	0.656504	0.919897	0.764953	0.518355	0.608942	0.72153	0.799729	0.727483	0.579329	0.497802	0.658557	0.652	0.66918	0.668697
8.05	0.599229	0.938976	0.790698	0.843521	0.914013	0.907388	0.908134	0.877193	0.944785	0.733165	0.957118	0.833182	0.742714	0.803571	0.626943	0.906344	0.943639	0.966543	0.883212	0.93424	0.66052	0.761633	0.687674	0.745501	0.775428	0.916297	0.65625	0.68321	0.70184	0.623294	0.721627	0.943513	0.664389	0.748864	0.600177	0.722561	0.928941	0.821616	0.590308	0.620907	0.763345	0.843031	0.759815	0.639166	0.538462	0.711409	0.654667	0.68803	0.678441
8.1	0.611432	0.927165	0.787252	0.827221	0.914013	0.905307	0.894737	0.878168	0.947853	0.73569	0.953688	0.845875	0.756869	0.799107	0.629016	0.901813	0.942029	0.97026	0.886861	0.933107	0.677284	0.766382	0.704356	0.769923	0.787513	0.911308	0.683388	0.690602	0.707975	0.642402	0.739829	0.958517	0.681469	0.751136	0.585172	0.693089	0.936693	0.749213	0.549192	0.615869	0.766014	0.820027	0.735566	0.605621	0.531868	0.691275	0.696	0.71819	0.696711
8.15	0.596018	0.931102	0.787252	0.809291	0.923567	0.920916	0.894737	0.882066	0.9591	0.741582	0.958834	0.838622	0.752706	0.78683	0.618653	0.901813	0.935588	0.966543	0.877129	0.945578	0.699078	0.788224	0.716404	0.784062	0.810675	0.936253	0.700658	0.719113	0.736196	0.66151	0.765525	0.957635	0.695132	0.754545	0.642542	0.731707	0.953488	0.795383	0.591777	0.65995	0.792705	0.85521	0.764434	0.638259	0.597802	0.727349	0.741333	0.740811	0.72838
8.2	0.597303	0.920276	0.771748	0.805216	0.910828	0.92924	0.889952	0.866472	0.956033	0.728956	0.965695	0.82049	0.750208	0.77567	0.612435	0.880665	0.929147	0.954151	0.885645	0.935374	0.710813	0.795821	0.723818	0.808483	0.835851	0.941242	0.727796	0.739176	0.76319	0.684258	0.788009	0.975287	0.735269	0.780682	0.60812	0.710366	0.934109	0.755509	0.530103	0.627834	0.779359	0.805142	0.750577	0.614687	0.576923	0.698826	0.704	0.753063	0.742996
8.25	0.626204	0.942913	0.776916	0.809291	0.92569	0.943809	0.902392	0.895712	0.965235	0.733165	0.959691	0.840435	0.780183	0.799107	0.623834	0.91994	0.94525	0.965304	0.891727	0.942177	0.729254	0.792972	0.73494	0.790488	0.816717	0.935144	0.731908	0.741288	0.760736	0.686988	0.776231	0.956752	0.732707	0.768182	0.642542	0.751016	0.940568	0.806925	0.597651	0.65869	0.811388	0.856563	0.788684	0.656392	0.60989	0.747483	0.752	0.757776	0.758831
8.3	0.62492	0.975394	0.79242	0.835371	0.937367	0.970864	0.926316	0.918129	1	0.757576	1	0.828649	0.786012	0.835938	0.635233	0.925982	1	1	0.905109	1	0.738474	0.791073	0.743281	0.804627	0.836858	0.950665	0.748355	0.736008	0.773006	0.696997	0.808351	0.9594	0.754056	0.771591	0.66549	0.780488	0.949612	0.795383	0.604993	0.674433	0.80694	0.838972	0.787529	0.670898	0.638462	0.76594	0.733333	0.768143	0.766139
8.35	0.637123	0.961614	0.763997	0.812551	0.940552	0.961498	0.926316	0.910331	0.97137	0.739057	0.989708	0.846782	0.780183	0.810268	0.627979	0.925982	0.993559	0.976456	0.900243	0.975057	0.761945	0.818613	0.771084	0.827763	0.840886	0.957871	0.759868	0.760296	0.781595	0.728844	0.830835	0.963813	0.754056	0.807955	0.66549	0.769309	0.934109	0.817419	0.613803	0.684509	0.798932	0.836265	0.779446	0.68087	0.646154	0.76594	0.722667	0.787936	0.777101
8.4	0.654464	0.966535	0.756245	0.808476	0.935244	0.976067	0.908134	0.901559	0.97546	0.743266	0.981132	0.848595	0.791007	0.802455	0.634197	0.92145	0.979066	0.981413	0.894161	0.965986	0.769489	0.830959	0.765524	0.83419	0.866062	0.9551	0.785362	0.785639	0.807362	0.747043	0.856531	0.969109	0.778822	0.805682	0.688438	0.785569	0.9677	0.824764	0.634361	0.699622	0.828292	0.859269	0.808314	0.705349	0.658242	0.783557	0.734667	0.812441	0.790499
8.45	0.646757	0.95374	0.743325	0.783211	0.895966	0.942768	0.894737	0.865497	0.952965	0.723906	0.953688	0.826836	0.787677	0.78125	0.606218	0.889728	0.929147	0.951673	0.858881	0.952381	0.762783	0.824311	0.76645	0.83419	0.864048	0.954545	0.766447	0.782471	0.782822	0.736124	0.842612	0.966461	0.769428	0.801136	0.711386	0.77439	0.950904	0.790136	0.632893	0.731738	0.824733	0.85115	0.821016	0.698096	0.683516	0.777685	0.758667	0.803959	0.781973
8.5	0.65896	0.963583	0.748493	0.797881	0.919321	0.973985	0.914833	0.888889	0.97137	0.753367	0.986278	0.830462	0.786012	0.797991	0.617617	0.918429	0.972625	0.962825	0.892944	0.964853	0.7829	0.836657	0.788693	0.835476	0.848943	0.947339	0.788651	0.80359	0.797546	0.761601	0.85439	0.968226	0.794193	0.828409	0.721977	0.785569	0.934109	0.83001	0.660793	0.739295	0.826512	0.85115	0.808314	0.720762	0.705495	0.784396	0.713333	0.821866	0.795371
8.55	0.65061	0.96063	0.732127	0.777506	0.91189	0.956296	0.900478	0.877193	0.968303	0.739057	0.975129	0.835902	0.779351	0.796875	0.60829	0.907855	0.953301	0.957869	0.886861	0.956916	0.789606	0.838557	0.783133	0.849614	0.861027	0.958426	0.800164	0.816262	0.823313	0.769791	0.852248	0.978817	0.795901	0.823864	0.733451	0.789634	0.962532	0.821616	0.669604	0.744962	0.817616	0.853857	0.801386	0.717135	0.7	0.786074	0.713333	0.829406	0.801462
8.6	0.671162	0.968504	0.732127	0.778321	0.906582	0.961498	0.90622	0.885965	0.973415	0.736532	0.973413	0.843155	0.786844	0.795759	0.605181	0.915408	0.967794	0.950434	0.885645	0.962585	0.795474	0.859449	0.807229	0.87018	0.869084	0.958426	0.856086	0.837381	0.862577	0.789809	0.880086	0.992056	0.854825	0.832955	0.773169	0.835366	0.963824	0.828961	0.696035	0.778967	0.850534	0.870095	0.829099	0.757933	0.751648	0.827181	0.753333	0.849199	0.834348
8.65	0.679512	0.974409	0.743325	0.786471	0.918259	0.969823	0.910048	0.896686	0.982618	0.743266	0.971698	0.838622	0.793505	0.797991	0.609326	0.92145	0.967794	0.964064	0.867397	0.975057	0.79715	0.853751	0.807229	0.871465	0.893253	0.96286	0.844572	0.839493	0.840491	0.7798	0.880086	0.981465	0.829206	0.831818	0.772286	0.825203	0.96124	0.841553	0.725404	0.754408	0.859431	0.866035	0.839492	0.764279	0.765934	0.827181	0.769333	0.842601	0.819732
8.7	0.659602	0.973425	0.742463	0.776691	0.904459	0.968783	0.909091	0.891813	0.986708	0.729798	0.988851	0.839529	0.777685	0.801339	0.594819	0.933535	0.995169	0.954151	0.884428	0.973923	0.808047	0.861349	0.817424	0.879177	0.885196	0.968958	0.840461	0.833157	0.855215	0.797088	0.879015	0.975287	0.833476	0.839773	0.773169	0.823171	0.966408	0.842602	0.71953	0.767003	0.847865	0.847091	0.844111	0.781505	0.769231	0.828859	0.776	0.857681	0.834348
8.75	0.683365	0.988189	0.727821	0.781581	0.916136	1	0.911005	0.892788	0.994888	0.756734	0.984563	0.839529	0.774355	0.802455	0.611399	0.932024	0.977456	0.973978	0.891727	0.993197	0.801341	0.862298	0.814643	0.881748	0.879154	0.971175	0.844572	0.836325	0.851534	0.792539	0.884368	0.967343	0.839453	0.842045	0.78376	0.838415	0.949612	0.837356	0.740088	0.782116	0.848754	0.856563	0.821016	0.784225	0.778022	0.830537	0.770667	0.863336	0.825822
8.8	0.682723	0.988189	0.729543	0.784841	0.892781	0.991675	0.902392	0.895712	0.980573	0.73569	0.977702	0.853128	0.785179	0.801339	0.611399	0.927492	0.964573	0.961586	0.885645	0.980726	0.826488	0.874644	0.825765	0.885604	0.88721	0.948448	0.855263	0.864836	0.879755	0.820746	0.875803	0.9594	0.853971	0.851136	0.805825	0.853659	0.968992	0.874082	0.770925	0.785894	0.879004	0.899865	0.864896	0.80417	0.8	0.862416	0.818667	0.887842	0.853837
8.85	0.67887	1	0.729543	0.778321	0.884289	0.998959	0.907177	0.892788	0.976483	0.729798	0.9494	0.854941	0.789342	0.802455	0.605181	0.92145	0.940419	0.954151	0.863747	0.95805	0.837385	0.880342	0.834106	0.892031	0.901309	0.965078	0.868421	0.864836	0.883436	0.839854	0.914347	0.972639	0.864219	0.868182	0.848191	0.876016	0.972868	0.89297	0.79442	0.835642	0.878114	0.91069	0.874134	0.847688	0.825275	0.862416	0.802667	0.891612	0.847747
8.9	0.687861	0.989173	0.721792	0.763651	0.882166	0.986472	0.891866	0.875244	0.978528	0.725589	0.942539	0.837715	0.794338	0.791295	0.602073	0.907855	0.943639	0.94052	0.854015	0.950113	0.829003	0.881292	0.845227	0.90617	0.92145	0.981707	0.877467	0.872228	0.883436	0.834395	0.904711	0.980583	0.874466	0.867045	0.797882	0.851626	0.94186	0.857293	0.785609	0.801637	0.864769	0.864682	0.847575	0.808704	0.78022	0.855705	0.814667	0.890669	0.840438
8.95	0.699422	0.981299	0.722653	0.766096	0.881104	0.991675	0.894737	0.889864	0.97137	0.717172	0.939966	0.840435	0.779351	0.782366	0.593782	0.906344	0.938808	0.935564	0.863747	0.944444	0.844929	0.902184	0.850788	0.915167	0.931521	0.971175	0.88898	0.883844	0.912883	0.852593	0.916488	0.978817	0.886422	0.877273	0.825243	0.854675	0.921189	0.870934	0.800294	0.813602	0.866548	0.894452	0.86836	0.836809	0.801099	0.847315	0.794667	0.900094	0.880633
9	0.692357	0.992126	0.722653	0.772616	0.884289	1.01769	0.907177	0.882066	0.988753	0.736532	0.93825	0.834995	0.789342	0.793527	0.598964	0.904834	0.950081	0.947955	0.856448	0.962585	0.843252	0.907882	0.859129	0.890746	0.940584	0.972284	0.898026	0.907075	0.905521	0.841674	0.912206	0.969109	0.894962	0.886364	0.842895	0.890244	0.9677	0.916055	0.839941	0.848866	0.893238	0.893099	0.889145	0.880326	0.846154	0.873322	0.8	0.886899	0.892814
9.05	0.70456	0.992126	0.715762	0.765281	0.873673	0.991675	0.890909	0.881092	0.98364	0.734848	0.939966	0.834089	0.782681	0.780134	0.597927	0.910876	0.953301	0.949195	0.851582	0.96712	0.849958	0.911681	0.869323	0.893316	0.929507	0.976164	0.88898	0.898627	0.905521	0.861692	0.912206	0.976169	0.886422	0.895455	0.849073	0.880081	0.981912	0.89297	0.837004	0.846348	0.88879	0.902571	0.886836	0.872167	0.82967	0.870805	0.816	0.900094	0.878197
9.1	0.683365	0.981299	0.695952	0.765281	0.867304	1.00624	0.885167	0.879142	0.98364	0.726431	0.927959	0.824116	0.778518	0.767857	0.585492	0.886707	0.930757	0.931846	0.846715	0.953515	0.860017	0.921178	0.871177	0.888175	0.920443	0.961197	0.900493	0.907075	0.910429	0.870792	0.917559	0.973522	0.895816	0.914773	0.850838	0.892276	0.957364	0.905561	0.85022	0.870907	0.885231	0.913396	0.897229	0.874887	0.853846	0.880872	0.829333	0.907634	0.886724
9.15	0.696211	0.975394	0.705426	0.762836	0.869427	0.998959	0.892823	0.878168	0.978528	0.725589	0.915952	0.839529	0.796836	0.771205	0.606218	0.913897	0.94525	0.944238	0.845499	0.959184	0.903604	0.941121	0.906395	0.952442	0.984894	0.977827	0.939145	0.938754	0.964417	0.912648	0.96788	0.980583	0.935098	0.936364	0.866726	0.917683	0.979328	0.911857	0.89721	0.867128	0.911032	0.94046	0.920323	0.908432	0.87033	0.89849	0.834667	0.942507	0.929354
9.2	0.686577	0.948819	0.701981	0.742461	0.834395	0.991675	0.877512	0.853801	0.972393	0.697811	0.901372	0.829556	0.786012	0.756696	0.578238	0.889728	0.921095	0.903346	0.810219	0.922902	0.888516	0.936372	0.899907	0.952442	0.98288	1	0.939145	0.931362	0.947239	0.898089	0.968951	1	0.944492	0.925	0.859665	0.888211	0.965116	0.917104	0.872247	0.865239	0.881673	0.890392	0.898383	0.894832	0.851648	0.88255	0.806667	0.938737	0.926918
9.25	0.688504	0.976378	0.704565	0.752241	0.847134	1.00312	0.883254	0.865497	0.989775	0.714646	0.897084	0.81777	0.766861	0.760045	0.578238	0.86858	0.922705	0.918216	0.836983	0.945578	0.895222	0.951567	0.908248	0.939589	0.954683	0.965632	0.940789	0.937698	0.947239	0.909918	0.949679	0.977935	0.936806	0.939773	0.871139	0.903455	0.962532	0.900315	0.885463	0.880982	0.912811	0.925575	0.918014	0.921124	0.852747	0.893456	0.818667	0.946277	0.928136
9.3	0.894669	1.33858	0.736434	0.740016	1.15499	1.26327	0.988517	0.974659	0.768916	0.609428	0.795026	0.796917	0.796836	0.748884	0.562694	1.0136	0.950081	0.936803	0.804136	1.01474	0.902766	0.964862	0.925857	0.947301	0.968781	0.959534	0.952303	0.983105	0.984049	0.925387	0.970021	0.973522	0.93339	0.965909	0.908208	0.945122	0.97416	0.944386	0.922173	0.907431	0.940391	0.97429	0.959584	0.952856	0.918681	0.920302	0.861333	0.950047	0.969549
9.35	0.705202	0.939961	0.717485	0.769356	0.848195	1.05099	0.908134	0.884016	1.04499	0.741582	0.945969	0.845875	0.787677	0.774554	0.594819	0.89426	1	0.931846	0.845499	0.952381	0.896899	0.940171	0.903614	0.96144	0.978852	0.983925	0.967928	0.95037	0.96319	0.906278	0.974304	0.991174	0.964133	0.9375	0.857017	0.877033	0.939276	0.881427	0.870778	0.890428	0.895907	0.897158	0.915704	0.905712	0.849451	0.874161	0.772	0.933082	0.946407
9.4	0.705202	0.978346	0.719208	0.757946	0.83121	1.01249	0.91866	0.885965	0.989775	0.704545	0.899657	0.844968	0.780183	0.771205	0.588601	0.900302	0.971014	0.913259	0.83455	0.947846	0.915339	0.958215	0.915663	0.931877	0.963746	0.97949	0.962993	0.949314	0.964417	0.910828	0.96788	0.980583	0.94193	0.9375	0.883495	0.919715	0.957364	0.911857	0.910426	0.911839	0.904804	0.913396	0.927252	0.928377	0.895604	0.913591	0.798667	0.945335	0.943971
9.45	0.696211	0.964567	0.699397	0.745721	0.846072	1.05411	0.896651	0.869396	1.02965	0.723906	0.906518	0.818676	0.759367	0.746652	0.567876	0.874622	0.937198	0.920694	0.846715	0.977324	0.923722	0.955366	0.924004	0.928021	0.944612	0.960089	0.949836	0.940866	0.948466	0.920837	0.950749	0.956752	0.938514	0.948864	0.901147	0.933943	0.963824	0.933893	0.913363	0.928841	0.910142	0.939107	0.93649	0.961015	0.916484	0.899329	0.796	0.93591	0.933009
9.5	0.728966	1.0128	0.730405	0.775061	0.867304	1.05515	0.929187	0.909357	1.01636	0.713805	0.90223	0.844062	0.793505	0.787946	0.612435	0.924471	0.961353	0.94052	0.879562	0.975057	0.93378	0.958215	0.937905	0.949871	0.975831	0.963969	0.969572	0.955649	0.957055	0.935396	0.963597	0.964695	0.953032	0.945455	0.924095	0.934959	0.966408	0.948583	0.935389	0.927582	0.939502	0.971583	0.953811	0.967362	0.925275	0.913591	0.832	0.965127	0.947625
9.55	0.721259	1.0187	0.722653	0.762836	0.828025	1.01353	0.912919	0.882066	0.996933	0.691077	0.871355	0.824116	0.779351	0.777902	0.585492	0.89577	0.937198	0.914498	0.847932	0.939909	0.953898	0.962013	0.949027	0.953728	0.979859	0.978936	0.976151	0.948258	0.970552	0.951774	0.977516	0.9797	0.955594	0.9625	0.938217	0.95935	0.958656	0.899265	0.930984	0.925063	0.958185	0.886333	0.919169	0.912058	0.941758	1	0.902667	0.974552	0.957369
9.6	0.695568	1.00591	0.713178	0.754686	0.839703	1.04162	0.915789	0.880117	1.0092	0.70202	0.875643	0.832276	0.774355	0.762277	0.577202	0.906344	0.964573	0.920694	0.843066	0.947846	0.958089	0.974359	0.953661	0.979434	0.978852	0.987251	0.986842	0.970433	0.979141	0.955414	0.978587	0.977935	0.972673	0.979545	0.946161	0.902439	0.914729	1	1	0.980479	0.831851	0.990528	0.995381	0.987307	0.961538	0.825503	0.72	0.978322	0.961023
9.65	0.680154	0.992126	0.704565	0.744906	0.815287	1.00728	0.901435	0.871345	0.996933	0.686027	0.882504	0.821396	0.755204	0.754464	0.564767	0.883686	0.938808	0.899628	0.829684	0.933107	0.966471	0.985755	0.97405	0.974293	0.986908	0.966741	0.995888	0.987328	1	0.990901	0.989293	0.971756	0.982067	0.989773	0.919682	0.916667	0.944444	0.905561	0.923642	0.95529	0.91548	0.94452	0.951501	0.93291	0.930769	0.908557	0.809333	0.994345	0.986602
9.7	0.678227	1.00197	0.709733	0.758761	0.823779	1.0333	0.909091	0.875244	0.994888	0.68771	0.863636	0.824116	0.759367	0.74442	0.565803	0.880665	0.929147	0.910781	0.845499	0.941043	0.970662	0.981956	0.986098	0.966581	0.992951	0.962306	0.991776	0.963041	0.966871	0.975432	0.976445	0.9594	0.975235	0.985227	0.976169	0.963415	0.971576	0.940189	0.9721	0.987406	0.956406	0.983762	0.974596	0.980961	0.963736	0.962248	0.873333	0.991517	0.962241
9.75	0.69043	1.03051	0.724376	0.762021	0.830149	1.01977	0.91866	0.895712	1.01022	0.693603	0.86964	0.830462	0.765196	0.771205	0.570984	0.904834	0.954911	0.915737	0.854015	0.956916	0.975692	0.977208	0.979611	0.976864	0.980866	0.969512	0.991776	0.963041	0.985276	0.987261	0.993576	0.973522	0.981213	0.984091	0.945278	0.970528	0.926357	0.916055	0.929515	0.990554	0.94306	0.962111	0.961894	0.964642	0.959341	0.964765	0.850667	0.99246	0.976857
9.8	0.669878	0.997047	0.704565	0.758761	0.787686	1.00728	0.895694	0.866472	0.986708	0.679293	0.848199	0.805077	0.737719	0.743304	0.548187	0.86858	0.917874	0.884758	0.807786	0.933107	0.979044	0.978158	0.984245	0.98329	0.995972	0.97949	0.994243	0.987328	0.991411	0.988171	0.981799	0.969991	0.982067	0.981818	0.980583	0.98374	0.95478	0.930745	0.964758	0.996851	0.970641	0.987821	0.983834	0.978241	1	0.98406	0.869333	1	0.984166
9.85	0.653179	0.995079	0.714901	0.753056	0.79087	1.01145	0.903349	0.849903	0.997955	0.680135	0.842196	0.795104	0.736053	0.735491	0.546114	0.845921	0.898551	0.893432	0.821168	0.92517	1	1	0.995366	1	1	0.970621	1	1	0.996319	1	1	0.969991	1	0.994318	0.984996	0.989837	0.950904	0.935992	0.957416	0.991184	0.975089	0.986468	1	1	0.992308	0.973993	0.889333	0.994345	0.995128
[truncated: 124 more columns]

## Sheet: Fig.1C Merge
Time (min)	GSK	GSK + Menthol		0.00945864	0.00955537
0	0.142095	0.130776		0.00900569	0.00977748
0.05	0.137532	0.129287		0.00925001	0.0104414
0.1	0.140745	0.136513		0.00917494	0.00960158
0.15	0.139686	0.128083		0.0090152	0.00932567
0.2	0.140621	0.13163		0.00885025	0.00975643
0.25	0.146985	0.136446		0.00923794	0.00925478
0.3	0.144833	0.126403		0.00959747	0.00924451
0.35	0.150666	0.132262		0.00944479	0.00944203
0.4	0.150215	0.129812		0.00943277	0.00937227
0.45	0.151787	0.122851		0.00895169	0.00935604
0.5	0.147374	0.131749		0.00953136	0.0107294
0.55	0.152718	0.139066		0.015459	0.00933749
0.6	0.191177	0.131072		0.00965752	0.00946703
0.65	0.149957	0.123979		0.00887849	0.00941623
0.7	0.141747	0.127989		0.00858899	0.00949578
0.75	0.145024	0.125348		0.00894318	0.00958496
0.8	0.139096	0.129315		0.00890752	0.00914948
0.85	0.147748	0.119633		0.00885998	0.0153857
0.9	0.147397	0.134412		0.0087568	0.00932174
0.95	0.146057	0.101832		0.00942106	0.00855896
1	0.148414	0.12485		0.00994968	0.00814105
1.05	0.143285	0.109668		0.00957374	0.00871098
1.1	0.136637	0.128487		0.00965742	0.0090496
1.15	0.132983	0.130017		0.00926999	0.00954575
1.2	0.134772	0.131854		0.00905679	0.00810174
1.25	0.133823	0.102629		0.00947297	0.00878563
1.3	0.132565	0.13588		0.0091635	0.00849722
1.35	0.134141	0.130715		0.00921098	0.00864875
1.4	0.132851	0.135374		0.00919514	0.00871933
1.45	0.131444	0.135641		0.00990227	0.00899369
1.5	0.137642	0.137833		0.00885182	0.00915612
1.55	0.128486	0.137344		0.00884792	0.00921599
1.6	0.119942	0.134761		0.0100468	0.00914548
1.65	0.140437	0.137213		0.00890123	0.00941389
1.7	0.132267	0.133532		0.00882081	0.00946348
1.75	0.126813	0.136495		0.00942576	0.00958511
1.8	0.130004	0.132157		0.00949465	0.00959282
1.85	0.132834	0.131972		0.00908061	0.00973757
1.9	0.128811	0.132524		0.00859517	0.0124586
1.95	0.126173	0.135856		0.0101814	0.0124177
2	0.12417	0.151543		0.0101648	0.0104782
2.05	0.126565	0.131783		0.0112669	0.0106647
2.1	0.129211	0.134071		0.0141669	0.0105475
2.15	0.135393	0.133214		0.0180607	0.010131
2.2	0.169995	0.130134		0.0216705	0.0108507
2.25	0.209113	0.159547		0.0255119	0.00961659
2.3	0.26216	0.138394		0.0278679	0.00988019
2.35	0.291482	0.155851		0.0321358	0.00996186
2.4	0.329675	0.174776		0.0327988	0.0101531
2.45	0.346929	0.193009		0.0354094	0.0112522
2.5	0.373378	0.205092		0.0352534	0.0115393
2.55	0.388696	0.220558		0.0367057	0.0120888
2.6	0.412135	0.232757		0.0366966	0.0125746
2.65	0.426695	0.241425		0.036476	0.0130362
2.7	0.436951	0.253469		0.0356224	0.0135208
2.75	0.448568	0.267959		0.0373442	0.0139106
2.8	0.464721	0.281751		0.0376006	0.0143326
2.85	0.47354	0.292576		0.0383361	0.0145782
2.9	0.482824	0.303891		0.0384904	0.0149967
2.95	0.492869	0.31065		0.0384987	0.0153614
3	0.502479	0.319285		0.0399947	0.0159149
3.05	0.517524	0.332888		0.0397733	0.0161047
3.1	0.521259	0.337769		0.0399431	0.0161513
3.15	0.52591	0.347355		0.0404873	0.0163901
3.2	0.535358	0.350527		0.0406648	0.0164091
3.25	0.536342	0.356984		0.0397093	0.0161738
3.3	0.543378	0.359578		0.040276	0.0167725
3.35	0.548295	0.365185		0.0401412	0.0168859
3.4	0.55824	0.373365		0.0398098	0.016849
3.45	0.566271	0.377868		0.0394688	0.0170451
3.5	0.574102	0.38522		0.0400563	0.0170318
3.55	0.578608	0.387469		0.0400617	0.0169889
3.6	0.592687	0.399865		0.0391736	0.0173976
3.65	0.587554	0.401759		0.0384082	0.0172299
3.7	0.594968	0.405536		0.0389084	0.0173169
3.75	0.609026	0.40978		0.0374234	0.0175774
3.8	0.60877	0.412812		0.0378438	0.0173642
3.85	0.617711	0.416667		0.0373424	0.0176255
3.9	0.618135	0.422437		0.0377889	0.0181521
3.95	0.625036	0.422602		0.0400492	0.0194363
4	0.621859	0.418574		0.0404267	0.0180854
4.05	0.655964	0.414184		0.0348069	0.018457
4.1	0.613345	0.42284		0.0358881	0.0184703
4.15	0.624901	0.431571		0.0342361	0.0181746
4.2	0.616359	0.439209		0.0338497	0.0176369
4.25	0.616219	0.44303		0.0340787	0.017577
4.3	0.613999	0.443123		0.0330848	0.0178696
4.35	0.618203	0.444586		0.0337079	0.0178344
4.4	0.617386	0.453643		0.0352208	0.0183183
4.45	0.643437	0.460876		0.0350779	0.0180067
4.5	0.63871	0.456252		0.0352624	0.0181437
4.55	0.648695	0.460434		0.0343321	0.0184108
4.6	0.6509	0.461293		0.0340908	0.0181792
4.65	0.64995	0.458788		0.0341602	0.0184605
4.7	0.659579	0.46162		0.0343602	0.0181207
4.75	0.663361	0.46904		0.0344162	0.0182089
4.8	0.670258	0.460993		0.0344572	0.0181861
4.85	0.671744	0.463944		0.0342513	0.0181902
4.9	0.670188	0.46946		0.0341971	0.0183556
4.95	0.666202	0.465254		0.0341778	0.0184388
5	0.670116	0.464686		0.0334	0.0189664
5.05	0.667233	0.470159		0.0341837	0.0190736
5.1	0.668179	0.466982		0.0336274	0.018927
5.15	0.667821	0.465504		0.0329555	0.0189335
5.2	0.664282	0.458451		0.033502	0.0192899
5.25	0.670454	0.459226		0.0325865	0.0194144
5.3	0.665829	0.466414		0.0326573	0.0193861
5.35	0.66509	0.464201		0.0326125	0.0194746
5.4	0.663381	0.465807		0.0326684	0.0188118
5.45	0.665033	0.460278		0.0320013	0.0190284
5.5	0.659062	0.440803		0.031383	0.0191797
5.55	0.654964	0.433937		0.032031	0.0195053
5.6	0.658542	0.428508		0.0321544	0.0196108
5.65	0.657522	0.430922		0.0319568	0.0192866
5.7	0.65244	0.429709		0.0319622	0.0209349
5.75	0.647245	0.445623		0.0312138	0.0195269
5.8	0.647799	0.43897		0.0308855	0.0196076
5.85	0.64379	0.436477		0.030885	0.0198202
5.9	0.638396	0.437305		0.0304063	0.0198606
5.95	0.633412	0.432595		0.0306371	0.019437
6	0.636732	0.430787		0.0302401	0.020002
6.05	0.624512	0.436399		0.0299251	0.0199144
6.1	0.624349	0.435918		0.029677	0.0199725
6.15	0.626918	0.435173		0.0295819	0.0202962
6.2	0.616972	0.441995		0.0301932	0.0205401
6.25	0.614518	0.425098		0.0294034	0.0199679
6.3	0.614271	0.434234		0.028961	0.0201725
6.35	0.605372	0.433571		0.0287942	0.0203185
6.4	0.60742	0.436618		0.0284628	0.0202495
6.45	0.60699	0.431298		0.028536	0.0202878
6.5	0.604434	0.429768		0.0283466	0.0206462
6.55	0.597384	0.434626		0.0282447	0.0206352
6.6	0.586976	0.432872		0.0279698	0.0204983
6.65	0.589878	0.431563		0.0277758	0.0205025
6.7	0.586271	0.432761		0.0274608	0.0206979
6.75	0.579112	0.433054		0.0272643	0.0207377
6.8	0.586604	0.429722		0.0272316	0.0206861
6.85	0.57558	0.431524		0.0264921	0.0204554
6.9	0.571156	0.436301		0.0257957	0.020921
6.95	0.570538	0.442352		0.0256841	0.0197788
7	0.565671	0.477602		0.0253217	0.0220676
7.05	0.568963	0.524631		0.0242285	0.0226032
7.1	0.573198	0.538955		0.0235363	0.0224107
7.15	0.577483	0.54577		0.022888	0.0221003
7.2	0.635784	0.57247		0.0228389	0.0220207
7.25	0.637364	0.595628		0.0223557	0.0201955
7.3	0.662063	0.604887		0.0222649	0.0191383
7.35	0.678098	0.611113		0.0219054	0.0182129
7.4	0.694269	0.629219		0.0241651	0.0176119
7.45	0.695209	0.646114		0.0232937	0.0169711
7.5	0.704321	0.655129		0.0249125	0.0162359
7.55	0.698471	0.676181		0.0244517	0.0157856
7.6	0.710012	0.6849		0.0197664	0.0152642
7.65	0.76648	0.696566		0.0186534	0.0145878
7.7	0.778359	0.706704		0.0187027	0.0146014
7.75	0.787168	0.718757		0.017955	0.0139294
7.8	0.805879	0.729775		0.017379	0.0133316
7.85	0.814611	0.743293		0.0168819	0.0129497
7.9	0.82483	0.75381		0.0167607	0.0124621
7.95	0.833067	0.764243		0.0159075	0.0114556
8	0.84541	0.77332		0.0153461	0.0113755
8.05	0.850243	0.781251		0.0145748	0.0105251
8.1	0.8523	0.788068		0.0138377	0.00999711
8.15	0.85959	0.804013		0.0139067	0.009728
8.2	0.858871	0.810388		0.0127627	0.00913708
8.25	0.868234	0.822361		0.0125149	0.00886827
8.3	0.876658	0.837935		0.0115167	0.0084823
8.35	0.874824	0.838759		0.0117874	0.00844616
8.4	0.872734	0.847685		0.0111499	0.00801407
8.45	0.881377	0.845418		0.0109504	0.00776855
8.5	0.878957	0.854708		0.0102647	0.00781441
8.55	0.881066	0.857731		0.00945322	0.00723641
8.6	0.894228	0.866496		0.0098195	0.00741986
8.65	0.891953	0.867964		0.00961255	0.00708622
8.7	0.890653	0.873653		0.00867246	0.00706655
8.75	0.896582	0.876771		0.0109081	0.00668722
8.8	0.879396	0.883767		0.00839881	0.00640217
8.85	0.900506	0.885671		0.00834667	0.00676007
8.9	0.893689	0.891003		0.00829428	0.0066233
8.95	0.899162	0.889856		0.00787041	0.00653879
9	0.895381	0.896603		0.00806085	0.00641164
9.05	0.895392	0.89791		0.00801539	0.00649073
9.1	0.901133	0.897238		0.00808731	0.00656519
9.15	0.898077	0.901292		0.00825879	0.0067289
9.2	0.901319	0.902669		0.00854232	0.00664738
9.25	0.896111	0.905491		0.00847523	0.00759511
9.3	0.90503	0.914121		0.00878441	0.0067183
9.35	0.90126	0.909964		0.0089369	0.0064477
9.4	0.898837	0.910157		0.00912004	0.0065115
9.45	0.897428	0.912028		0.00924542	0.00644927
9.5	0.900799	0.919592		0.00953105	0.00680976
9.55	0.896642	0.914529		0.00974037	0.00741933
9.6	0.89383	0.91305		0.0100507	0.00713211
9.65	0.891591	0.914868		0.0101635	0.00770839
9.7	0.891294	0.917372		0.0105109	0.0072988
9.75	0.885061	0.915615		0.0106464	0.00735065
9.8	0.885925	0.916769		0.0110006	0.00773839
9.85	0.878719	0.91961
9.9
