# Supplementary material for: Involvement of TRPV4 in temperature-dependent perspiration in mice
Source: eLife. 2024 Jul 4;13:RP92993. doi: 10.7554/eLife.92993 (PMC11223765; doi:10.7554/eLife.92993)
Supplement: Figure 3—source data 1. [file elife-92993-fig3-data1.xlsx]

## Sheet: Fig.3A (Ach)
WT-25C							V4KO-25C
Data ID	Area 1	Area 2	Area 3	Area 4	Total		Data ID	Area 1	Area 2	Area 3	Area 4	Total
171108-a	10	43	46	26	125		171108-a	14	18	23	9	64
171108-b	10	9	19	6	44		171108-c	1	24	41	19	85
171108-c	25	17	12	13	67		171114-e l	38	59	49	38	184
171108-d	22	24	22	21	89		17114-e r	6	34	14	14	68
240213-Wt#5-R	20	34	18	2	74		240221 V4KO#1-R	9	19	7	3	38
240213-Wt#6-L	10	26	19	14	69		240221 V4KO#2-R	2	13	12	0	27
240214-Wt#1-R	14	33	22	9	78		240229-V4KO#2-R	1	3	9	0	13
240214-Wt#3-R	6	30	18	11	65		240306-V4KO#5-R	0	28	30	0	58
240214-Wt#5-R	3	18	16	0	37
Mean dots/paw					72		Mean dots/paw					67.125
n					9		n					8
SD					17.3333		SD					33.9062
SEM					5.77778		SEM					11.9877
WT-35C							V4KO-35C
Data ID	Area 1	Area 2	Area 3	Area 4	Total		Data ID	Area 1	Area 2	Area 3	Area 4	Total
171108-e	43	38	32	21	134		171108-b	7	29	27	28	91
171108-f	41	60	97	55	253		171114 - d l	11	8	8	14	41
171031 - a	33	41	43	29	146		171114-d r	8	31	30	5	74
240214-Wt#2-R	16	46	64	17	143		240229-V4KO#3-R	0	1	4	1	6
240214-Wt#4-R	25	69	115	14	223		240305-V4KO#2-L	6	31	36	7	80
240305-Wt#1-R	20	61	66	9	156		240305-V4KO#2-R	3	43	41	2	89
240305-Wt#2-R	2	42	33	3	80		240306-V4KO#1-R	3	16	20	3	42
240305-Wt#6-R	14	23	26	6	69		240306-V4KO#2-R	13	27	28	6	74
240305-Wt#7-L	8	31	42	10	91		240306-V4KO#3-R	5	10	5	2	22
240305-Wt#8-L	14	21	37	17	89
Mean dots/paw					138.4		Mean dots/paw					57.6667
n					10		n					9
SD					45.8		SD					26.5926
SEM					14.4832		SEM					8.8642

## Sheet: Fig.3B (wo Ach)
WT-25C							V4KO-25C
Data ID	Area 1	Area 2	Area 3	Area 4	Total		Data ID	Area 1	Area 2	Area 3	Area 4	Total
240213-Wt#1-L	16	20	39	13	88		240221 V4KO#1-L	0	9	16	0	25
240213-Wt#2-L	9	36	69	41	155		240221 V4KO#2-L	8	10	16	4	38
240213-Wt#6-R	21	56	24	0	101		240221 V4KO#3-L	5	15	19	6	45
240229-Wt#1-L	7	28	48	11	94		240224-V4KO#1-L	3	38	24	0	65
240229-Wt#2-L	9	47	41	26	123		240229-V4KO#1-L	13	12	6	5	36
240229-Wt#2-R	5	26	39	5	75		240229-V4KO#2-L	0	5	15	1	21
240305-Wt#3-L	13	29	37	26	105		240229-V4KO#4-L	5	43	36	11	95
240305-Wt#4-L	14	36	38	17	105		240229-V4KO#5-L	7	35	13	14	69
240306-Wt#1-L	10	19	32	13	74		240306-V4KO#5-L	2	49	26	8	85
240306-Wt#1-R	9	39	30	11	89
Mean dots/paw					100.9		Mean dots/paw					53.2222
n					10		n					9
SD					16.9		SD					22.4691
SEM					5.34425		SEM					7.48971
WT-35C							V4KO-35C
Data ID	Area 1	Area 2	Area 3	Area 4	Total		Data ID	Area 1	Area 2	Area 3	Area 4	Total
240213-Wt#4-R	28	42	43	10	123		240221 V4KO#3-R	4	40	19	8	71
240214-Wt#2-L	14	44	37	28	123		240229-V4KO#1-R	7	8	4	1	20
240214-Wt#4-L	25	49	53	44	171		240229-V4KO#3-L	2	9	10	8	29
240229-Wt#1-R	27	56	60	17	160		240229-V4KO#4-R	8	52	31	0	91
240305-Wt#1-L	42	43	53	29	167		240229-V4KO#5-R	13	61	63	6	143
240305-Wt#2-L	15	45	58	27	145		240305-V4KO#1-L	1	12	29	15	57
240305-Wt#3-R	9	69	33	10	121		240306-V4KO#1-L	10	34	32	22	98
240305-Wt#5-L	20	39	48	27	134		240306-V4KO#2-L	16	69	56	20	161
240305-Wt#6-L	26	64	63	69	222		240306-V4KO#3-L	9	27	39	8	83
Mean dots/paw					151.778		Mean dots/paw					83.6667
n					9		n					9
SD					25.0864		SD					35.1852
SEM					8.36214		SEM					11.7284

## Sheet: Fig.3C (WT Menthol)
WT-EtOH							WT-Menthol
Data ID	Area 1	Area 2	Area 3	Area 4	Total		Data ID	Area 1	Area 2	Area 3	Area 4	Total
200508-1	15	20	39	22	96		200508-1	8	15	22	25	70
200508-2	13	15	30	32	90		200508-2	4	24	11	25	64
200511-1	16	19	31	46	112		200511-1	2	28	13	30	73
200511-3	18	9	15	23	65		200511-3	14	18	33	20	85
200521-2	24	18	13	17	72		200521-2	5	20	11	21	57
200521-3	35	23	27	33	118		200521-3	2	12	13	10	37
200521-4	21	14	41	17	93		200521-4	7	14	21	17	59
200521-5	17	11	18	10	56		200521-5	21	15	23	22	81
Mean dots/paw					87.75		Mean dots/paw					65.75
n					8		n					8
SD					17.5625		SD					11.5
SEM					6.20928		SEM					4.06586

## Sheet: Fig.3D (M8KO menthol)
M8KO-EtOH							M8KO-Menthol
Data ID	Area 1	Area 2	Area 3	Area 4	Total		Data ID	Area 1	Area 2	Area 3	Area 4	Total
240222 M8KO#1-L	17	75	57	15	164		240222 M8KO#1-R	22	31	22	28	103
240222 M8KO#2-L	2	20	43	22	87		240222 M8KO#2-R	2	3	18	11	34
240222 M8KO#3-L	5	30	20	1	56		240222 M8KO#3-R	8	29	29	9	75
240222 M8KO#4-L	11	81	43	23	158		240222 M8KO#4-R	9	40	17	1	67
240222 M8KO#5-L	2	23	55	11	91		240222 M8KO#5-R	5	13	24	8	50
240222 M8KO#6-L	3	23	24	5	55		240222 M8KO#6-R	1	7	3	0	11
240229 M8KO#1-L	7	7	13	18	45		240229 M8KO#3-L	16	16	8	26	66
240229 M8KO#2-L	10	39	63	5	117		240229 M8KO#4-L	3	13	34	4	54
							240229 M8KO#4-R	0	5	8	0	13
Mean dots/paw					96.625		Mean dots/paw					52.5556
n					8		n					9
SD					37.2812		SD					22.716
SEM					13.1809		SEM					7.57202

## Sheet: Fig.3E (Ani9 25C)
WT-EtOH							WT-Ani9
Data ID	Area 1	Area 2	Area 3	Area 4	Total		Data ID	Area 1	Area 2	Area 3	Area 4	Total
240324 Wt#1-L	4	13	38	29	84		240324 Wt#2-R	1	26	17	8	52
240324 Wt#2-L	14	63	28	4	109		240324 Wt#3-R	1	16	18	1	36
240324 Wt#3-L	20	65	40	19	144		240324 Wt#4-L	0	10	9	0	19
240324 Wt#5-L	15	22	38	15	90		240324 Wt#4-R	7	10	5	1	23
							240324 Wt#5-R	1	7	9	2	19
Mean dots/paw					106.75		Mean dots/paw					29.8
n					4		n					5
SD					19.75		SD					11.36
SEM					9.875		SEM					5.08035

## Sheet: Fig.3F (Ani9 35C)
WT-EtOH							WT-Ani9
Data ID	Area 1	Area 2	Area 3	Area 4	Total		Data ID	Area 1	Area 2	Area 3	Area 4	Total
240324 Wt#1-R	13	27	68	19	127		240325 Wt#1-L	7	14	11	2	34
240324 Wt#7-L	22	43	60	15	140		240325 Wt#1-R	2	5	6	6	19
240325 Wt#4-L	9	44	32	25	110		240325 Wt#2-L	3	4	10	5	22
240325 Wt#4-R	19	40	27	13	99		240325 Wt#2-R	2	1	3	1	7
							240325 Wt#3-L	5	1	8	5	19
							240325 Wt#3-R	0	22	10	1	33
Mean dots/paw					119		Mean dots/paw					22.3333
n					4		n					6
SD					14.5		SD					7.44444
SEM					7.25		SEM					3.03918
