# Supplementary material for: Involvement of TRPV4 in temperature-dependent perspiration in mice
Source: eLife. 2024 Jul 4;13:RP92993. doi: 10.7554/eLife.92993 (PMC11223765; doi:10.7554/eLife.92993)
Supplement: Figure 5—source data 1. [file elife-92993-fig5-data1.xlsx]

## Sheet: Sheet1
	TRPV4 expression
Control No.	Age	Sex		AIGA No.	Age	Sex
1	16	male	3+	1	26	male	1+
2	15	female	3+	2	35	male	1+
3	17	female	2+	3	34	male	2+
4	63	male	2+	4	53	male	1+
5	54	male	3+	5	54	male	1+
6	45	male	2+	6	45	male	1+
7	32	male	2+	7	55	male	1+
8	37	male	2+	8	24	male	1+
9	25	male	3+	9	52	male	1+
10	15	male	3+	10	36	male	1+
		Evaluated by increasing degree 1+, 2+, 3+
		AIGA:Acquired idiopathic generalized anhidrosis
